# Supplementary material for: Design, Synthesis and Biological Evaluation of N-phenylindole Derivatives as Pks13 Inhibitors againstMycobacterium tuberculosis
Source: MDPI journal article supplement (doi:10.3390/molecules27092844), 2022-04-29
Supplement: s1 [file s1]

# Design, Synthesis and Biological Evaluation of *N*-phenylindole Derivatives as Pks13 Inhibitors against *Mycobacterium tuberculosis*

Yanpeng Cai <sup>1,†</sup>, Wei Zhang <sup>1,†</sup>, Shichun Lun <sup>2,†</sup>, Tongtong Zhu <sup>1</sup>, Weijun Xu <sup>1</sup>, Fan Yang <sup>1</sup>, Jie Tang <sup>3</sup>, William R. Bishai <sup>2,\*</sup> and Lifang Yu <sup>1,\*</sup>

<sup>1</sup> Shanghai Engineering Research Center of Molecular Therapeutics and New Drug Development, School of Chemistry and Molecular Engineering, East China Normal University, 3663 North Zhongshan Road, Shanghai 200062, China; caiyanpengdl@163.com (Y.C.); zhangwei@chem.ecnu.edu.cn (W.Z.); zhutongtong816@163.com (T.Z.); xuweijundl@163.com (W.X.); fyang@chem.ecnu.edu.cn (F.Y.)

<sup>2</sup> Center for Tuberculosis Research, Department of Medicine, Division of Infectious Disease, Johns Hopkins School of Medicine, Baltimore, MD 21231-1044, USA; slun1@jhmi.edu

<sup>3</sup> Shanghai Key Laboratory of Green Chemistry and Chemical Process, School of Chemistry and Molecular Engineering, East China Normal University, 3663 North Zhongshan Road, Shanghai 200062, China; jtang@chem.ecnu.edu.cn

\* Correspondence: wbishai1@jhmi.edu (W.R.B.); lfyu@sat.ecnu.edu.cn (L.F.Y.)

† These authors contributed equally to this work.

|                                                                          |         |
|--------------------------------------------------------------------------|---------|
| NMR spectra ( <sup>1</sup> H and <sup>13</sup> C) of all final compounds | S2-S37  |
| Analytical HPLC purities of final compounds                              | S38     |
| Analytical HPLC traces of Compounds 45 and 58                            | S39-S41 |
| HRMS of Compounds 45 and 58                                              | S42     |

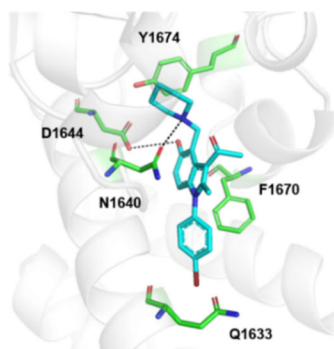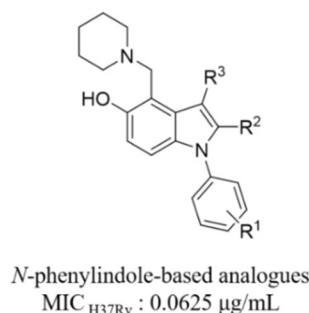

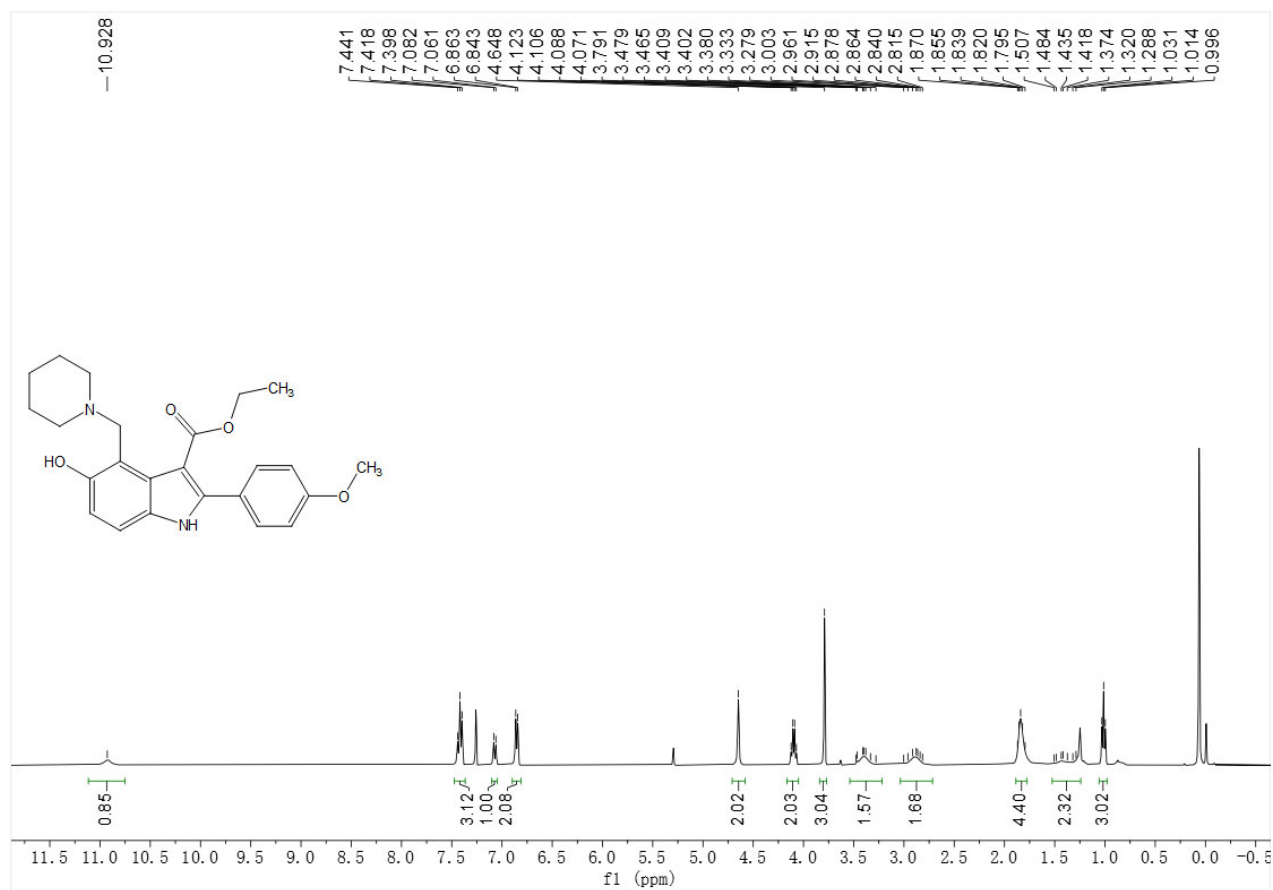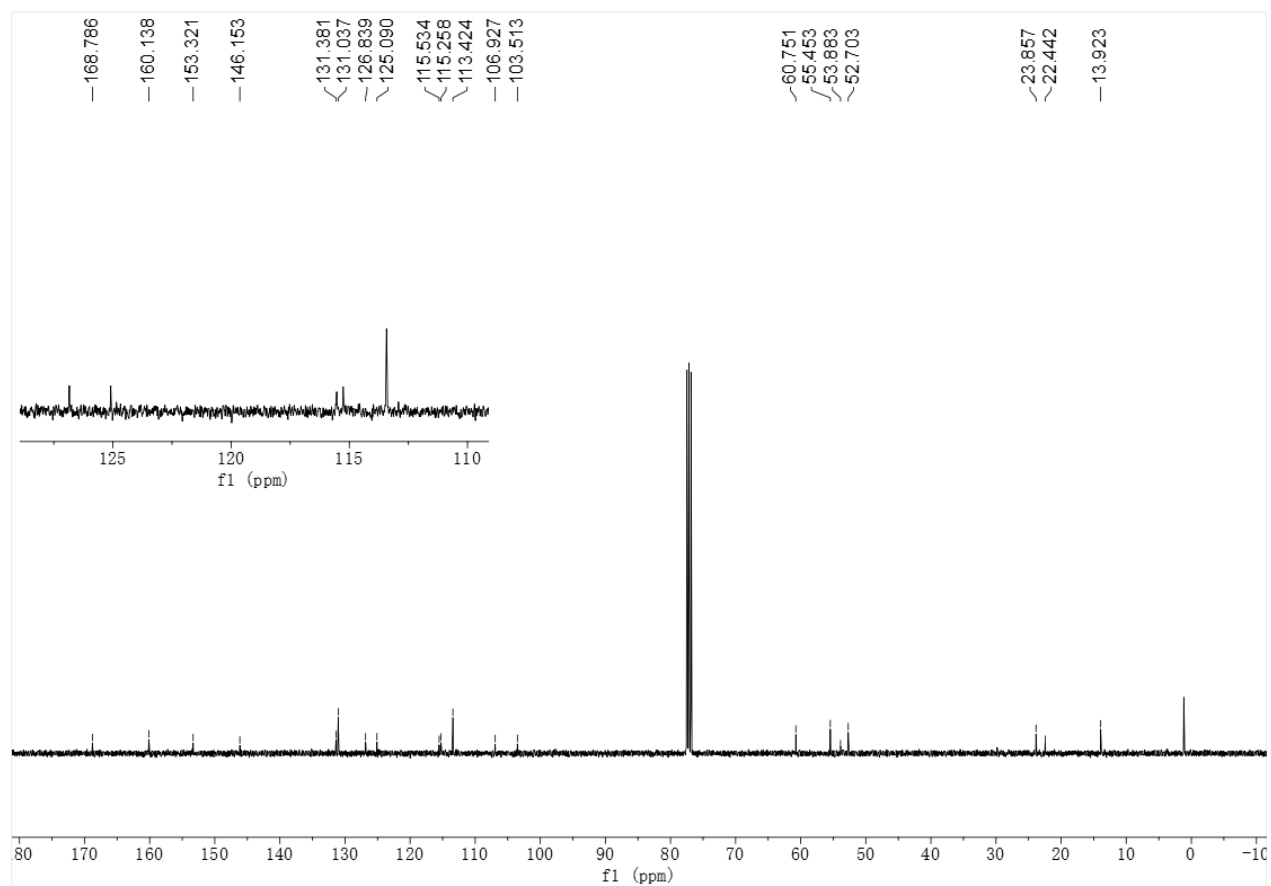

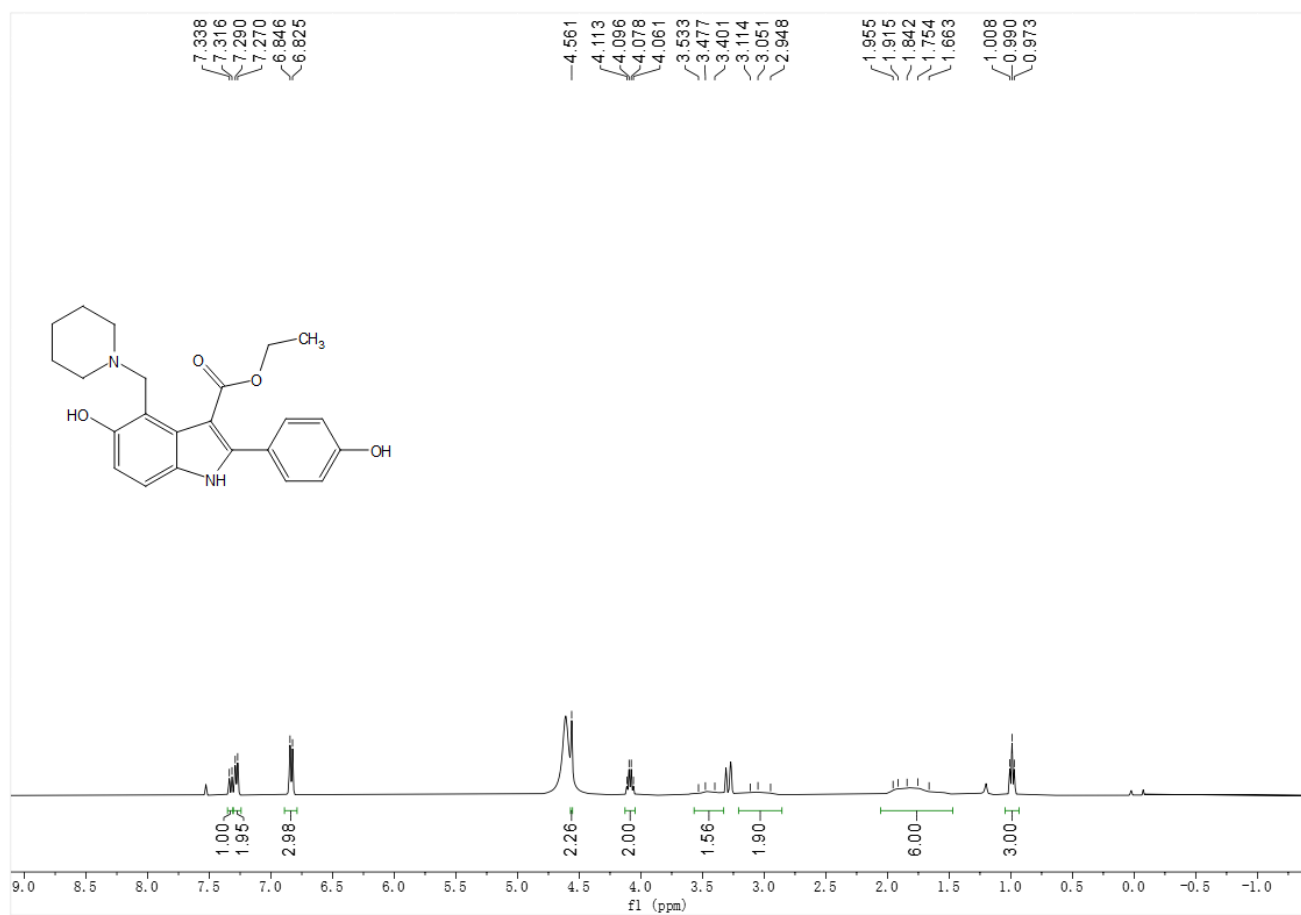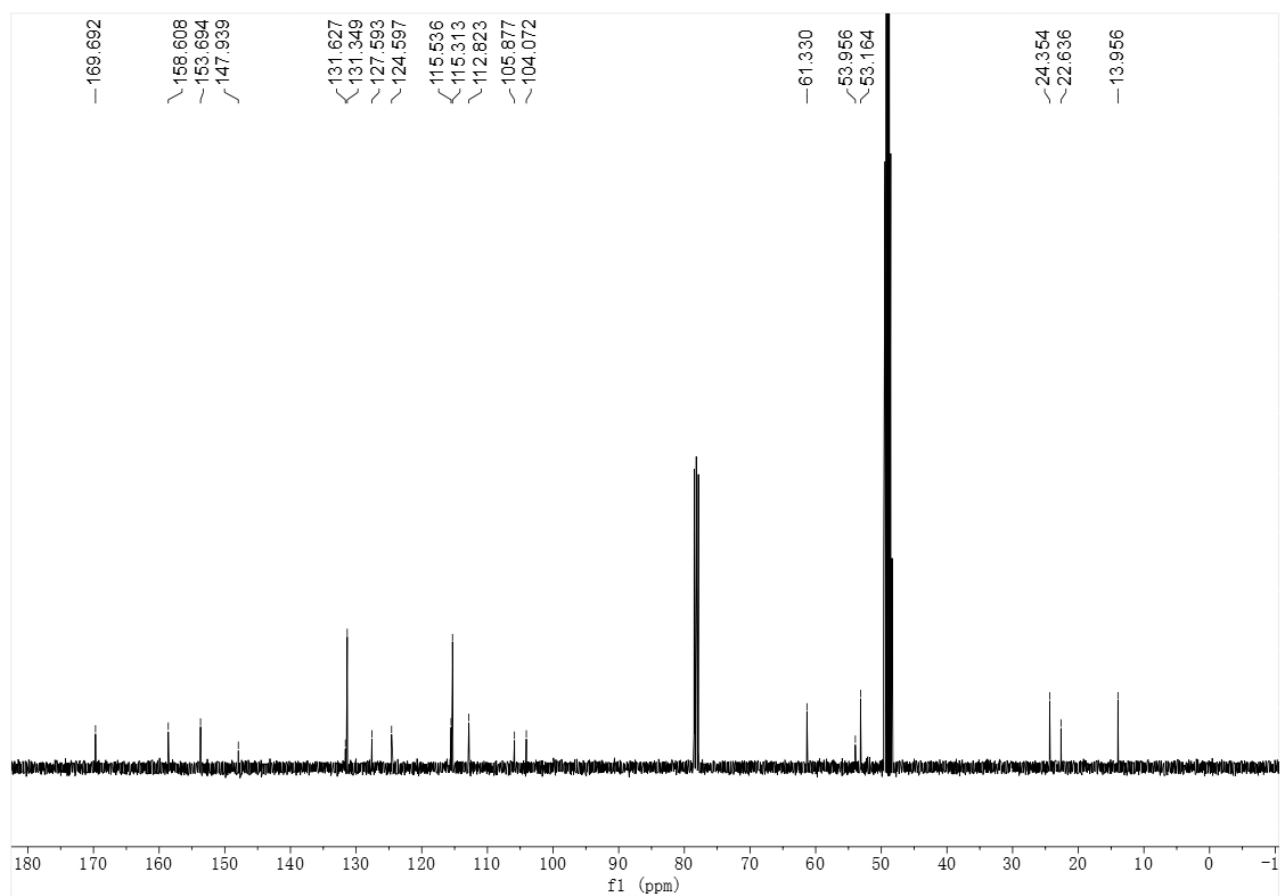

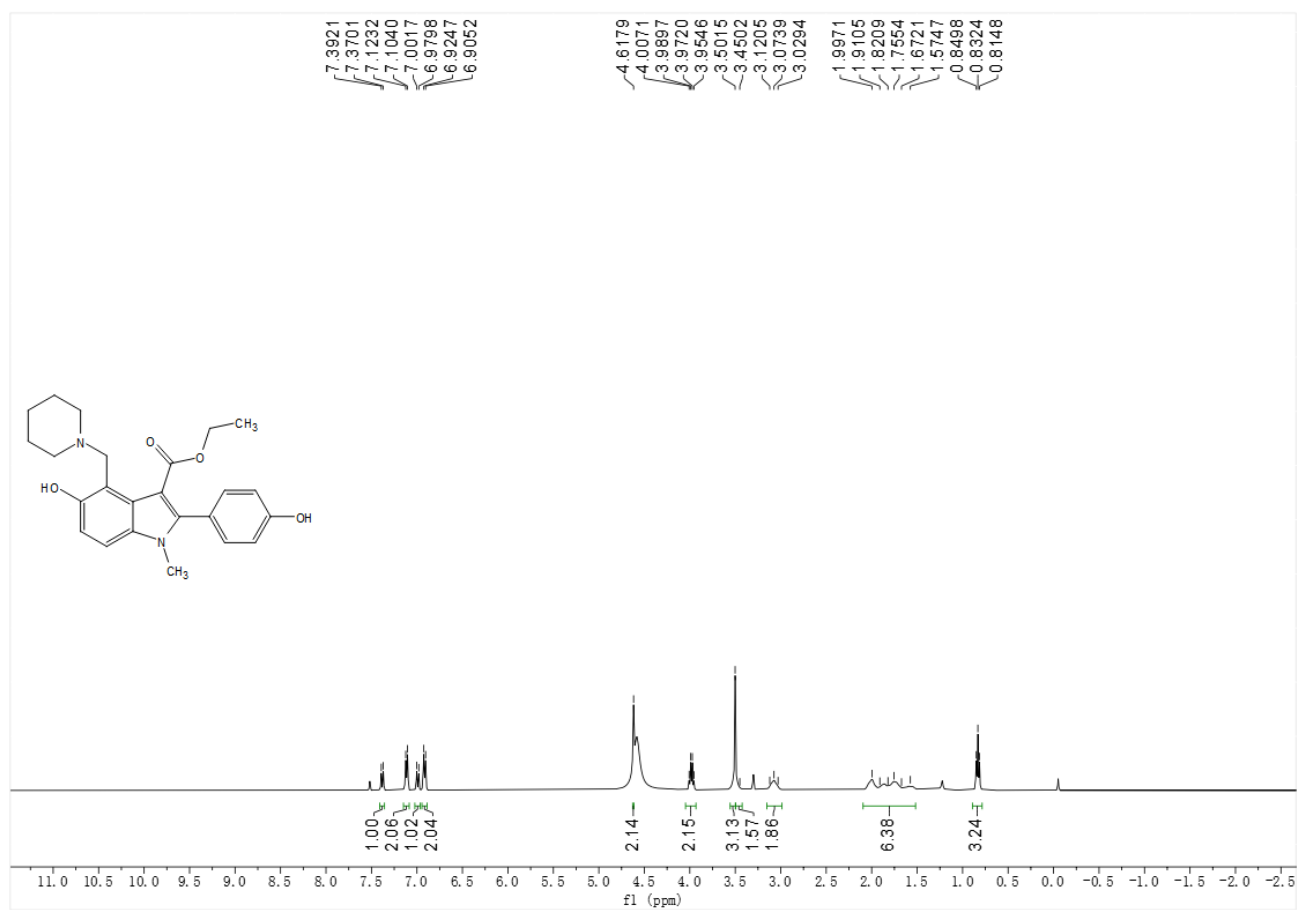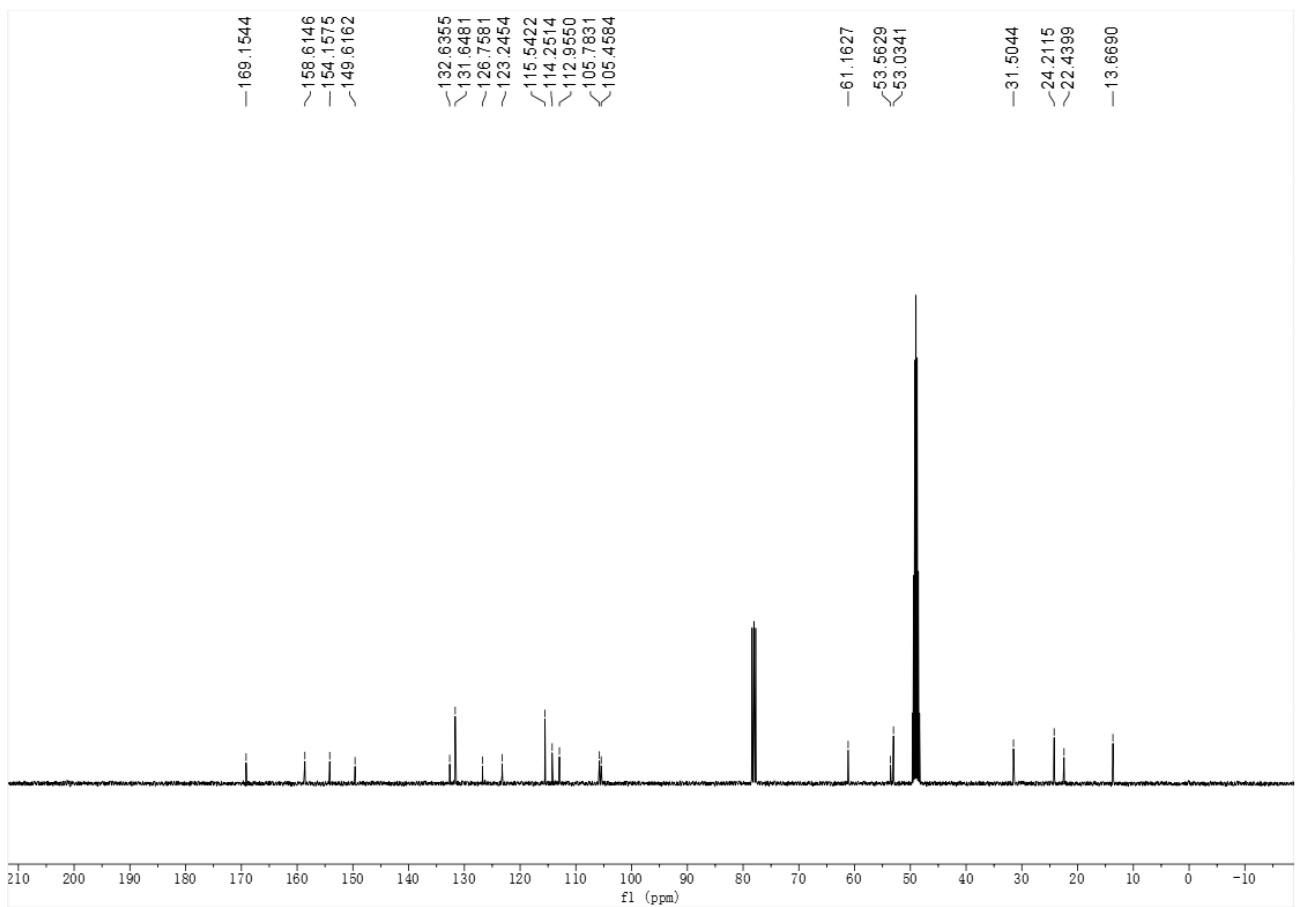

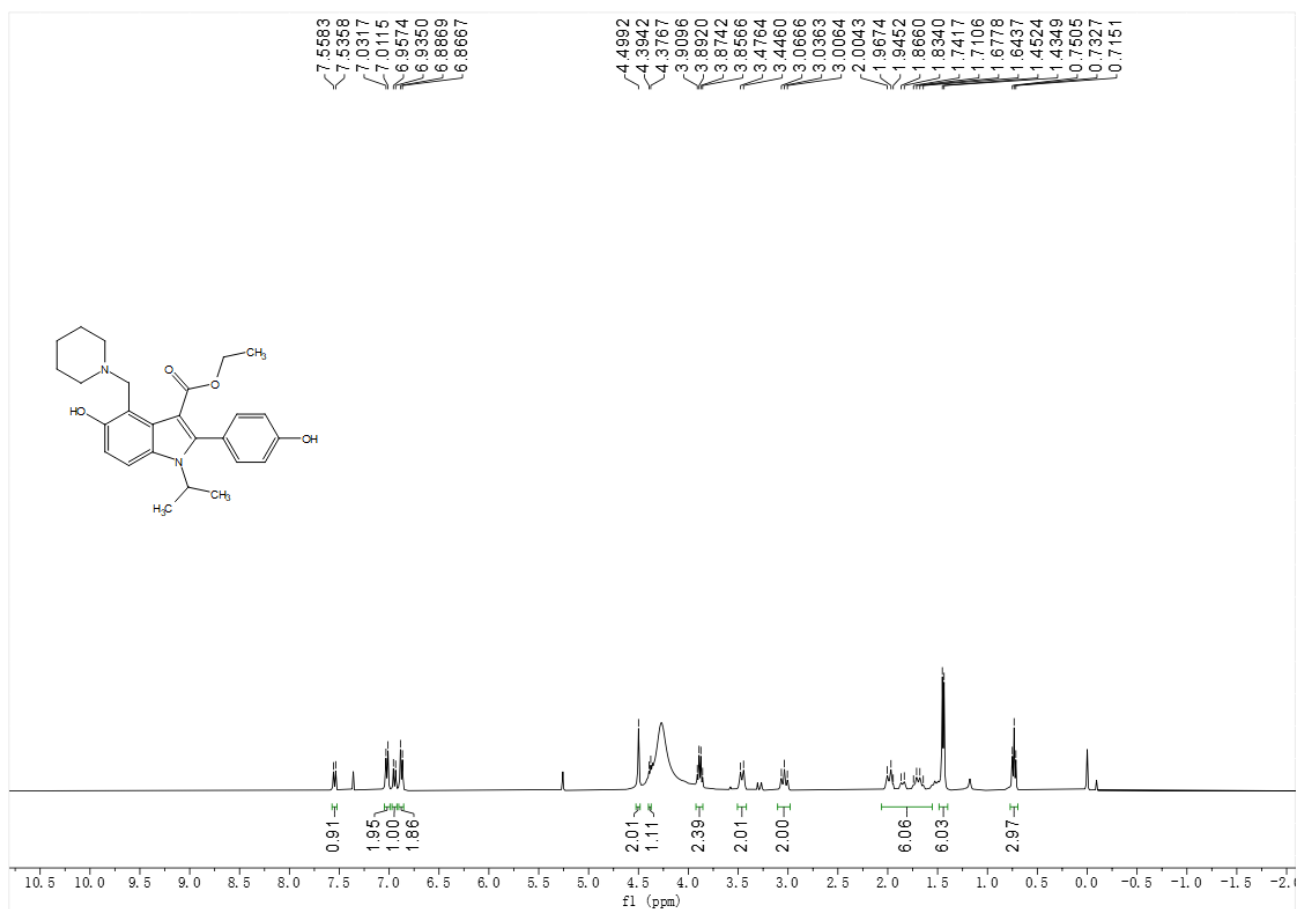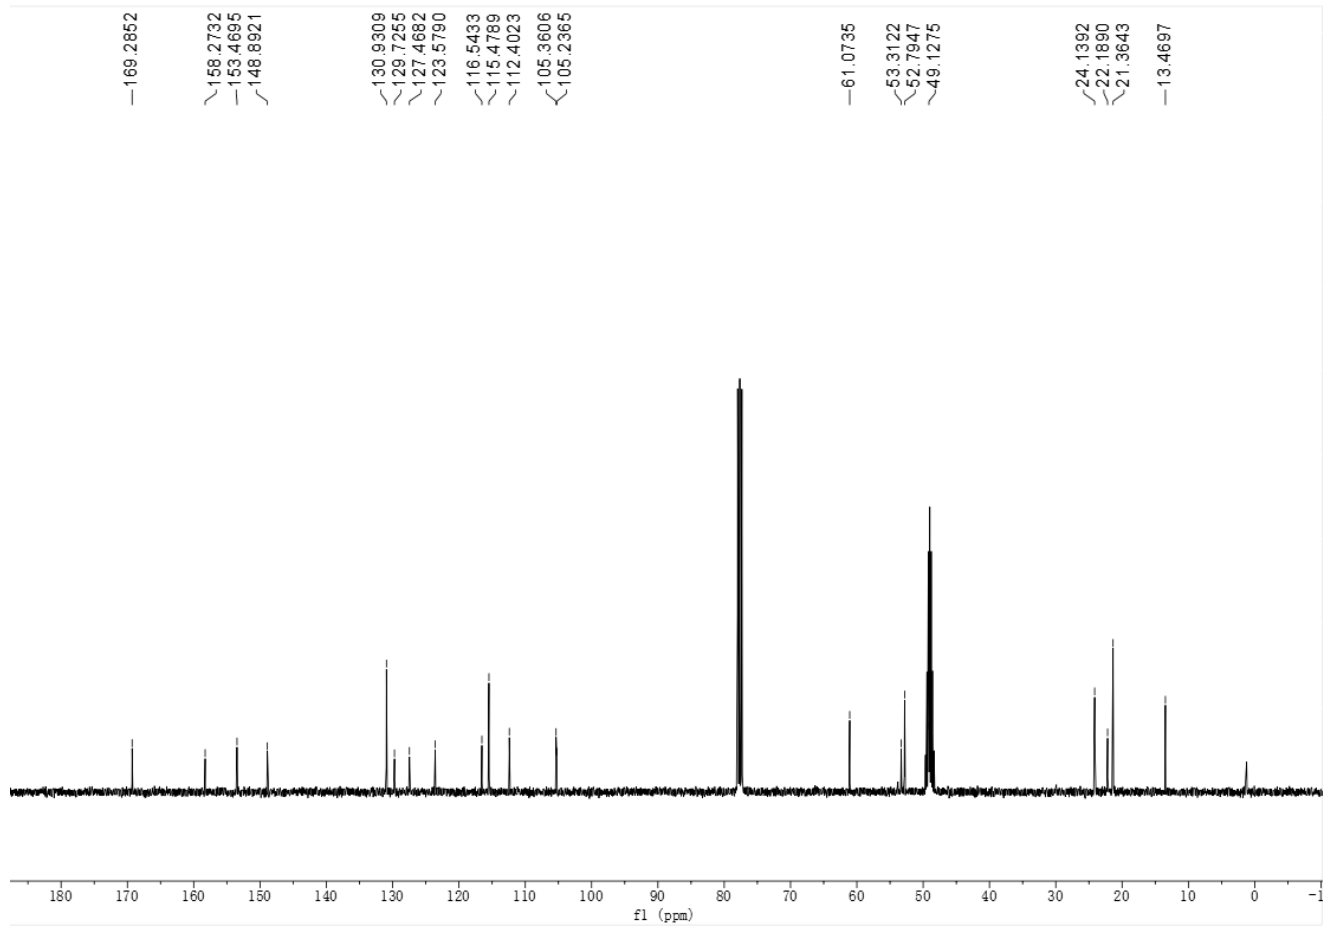

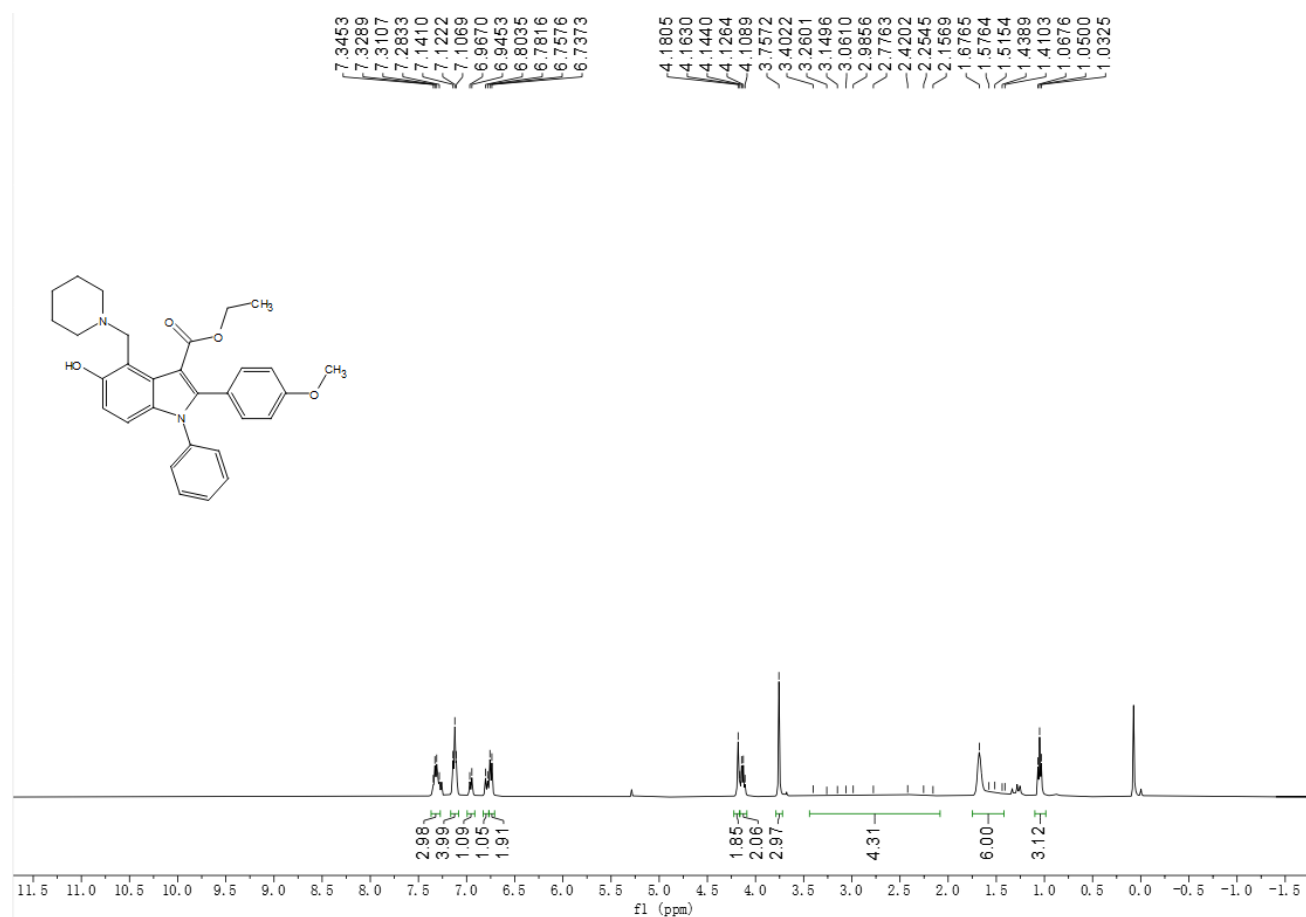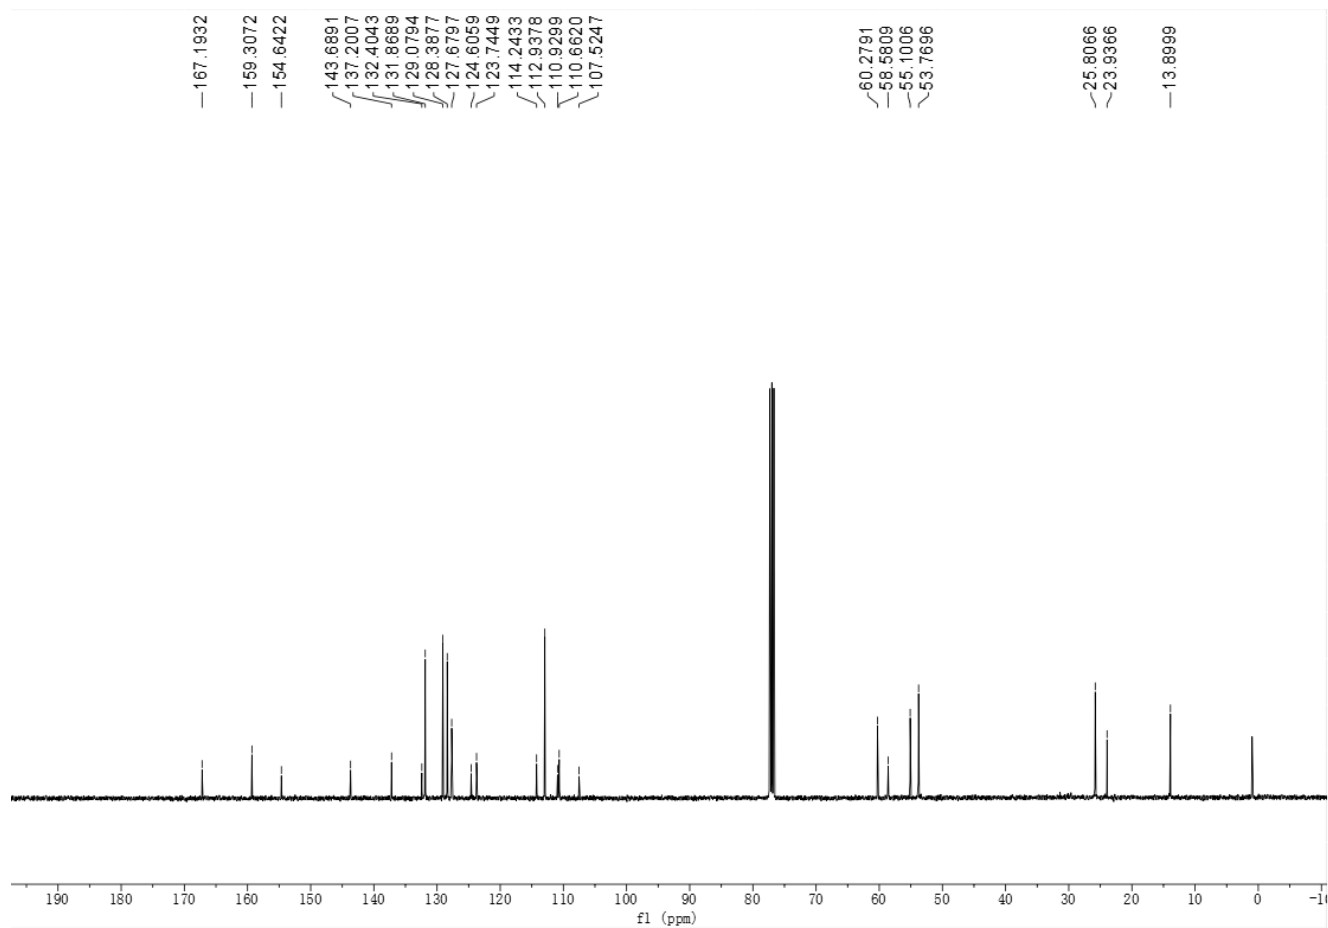

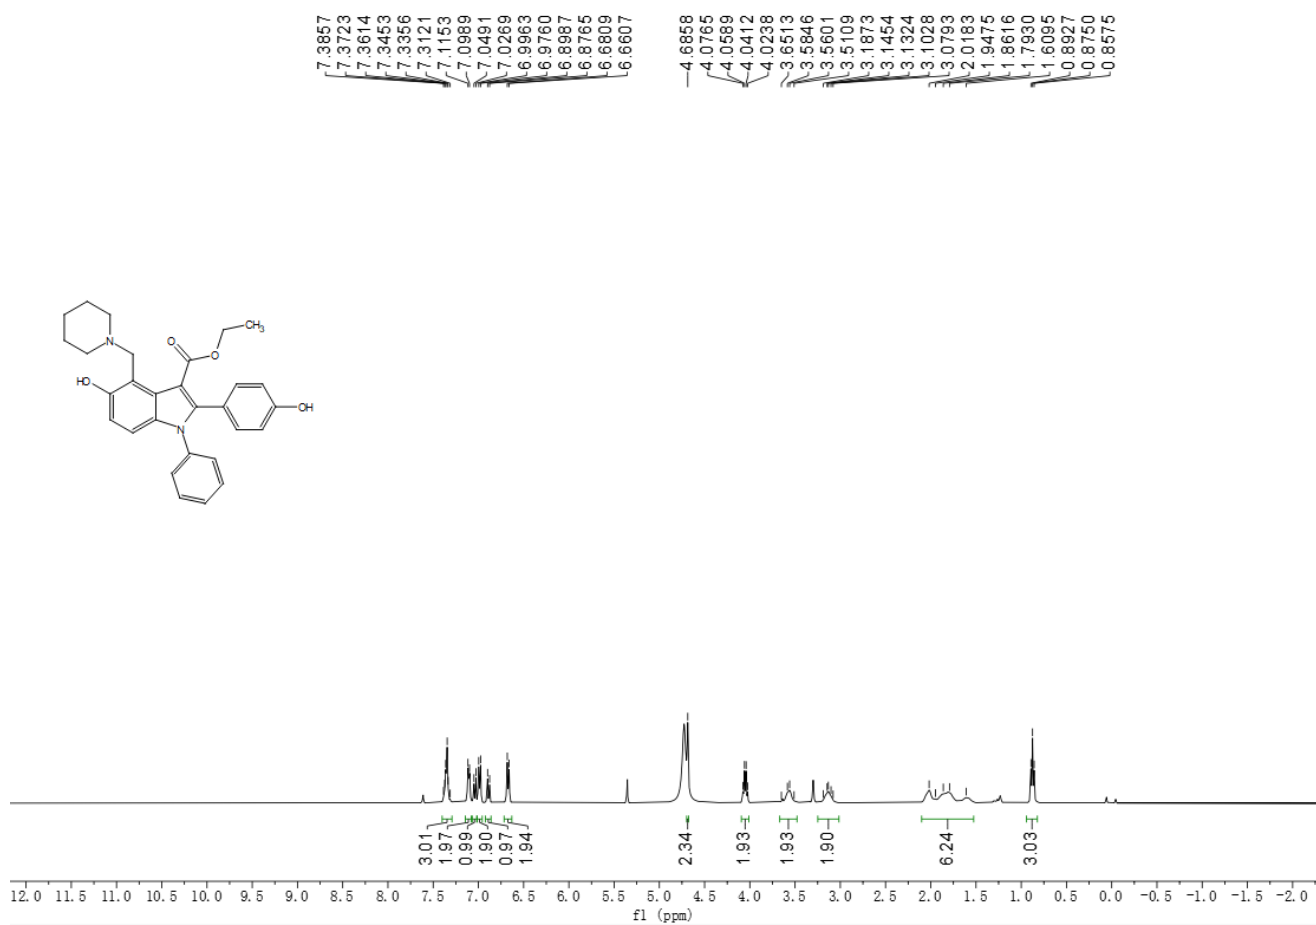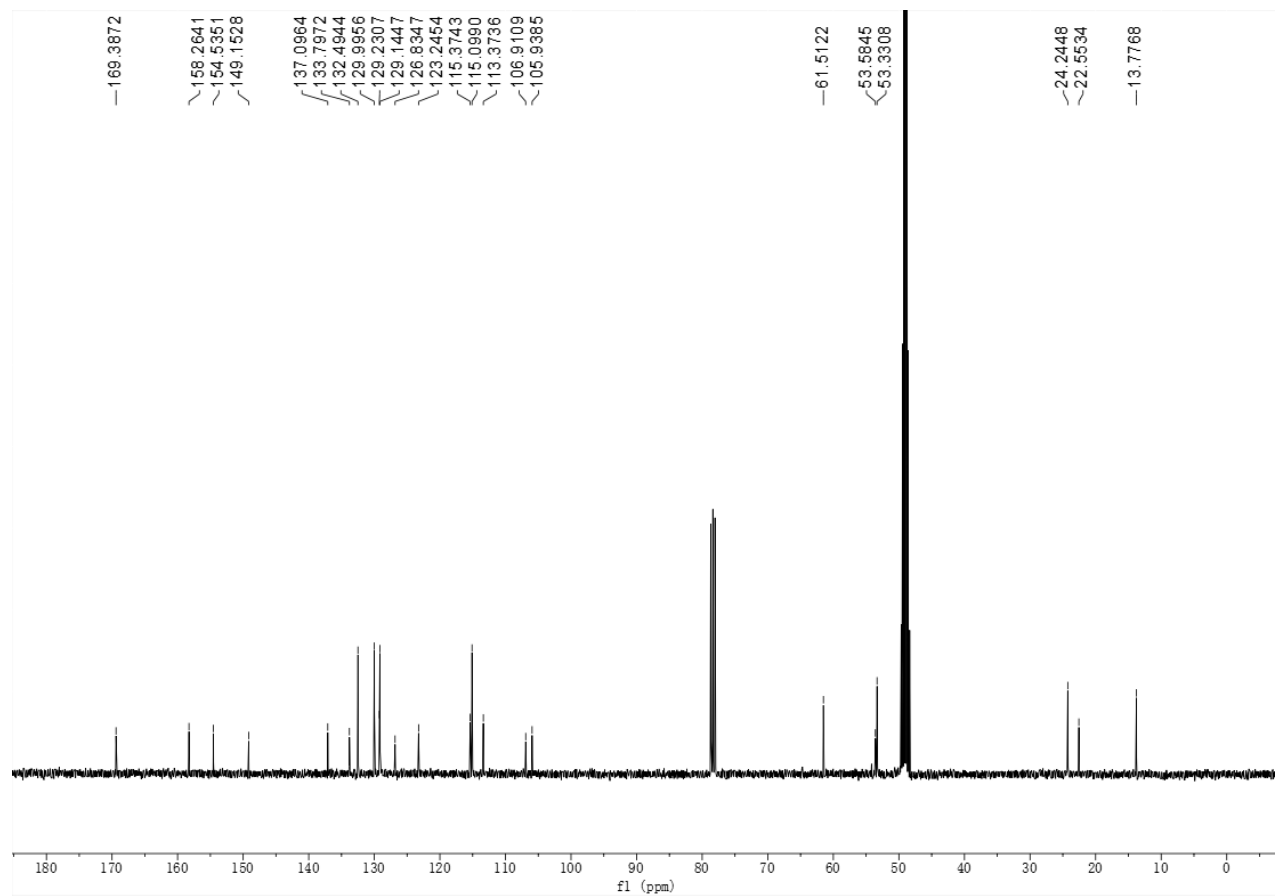

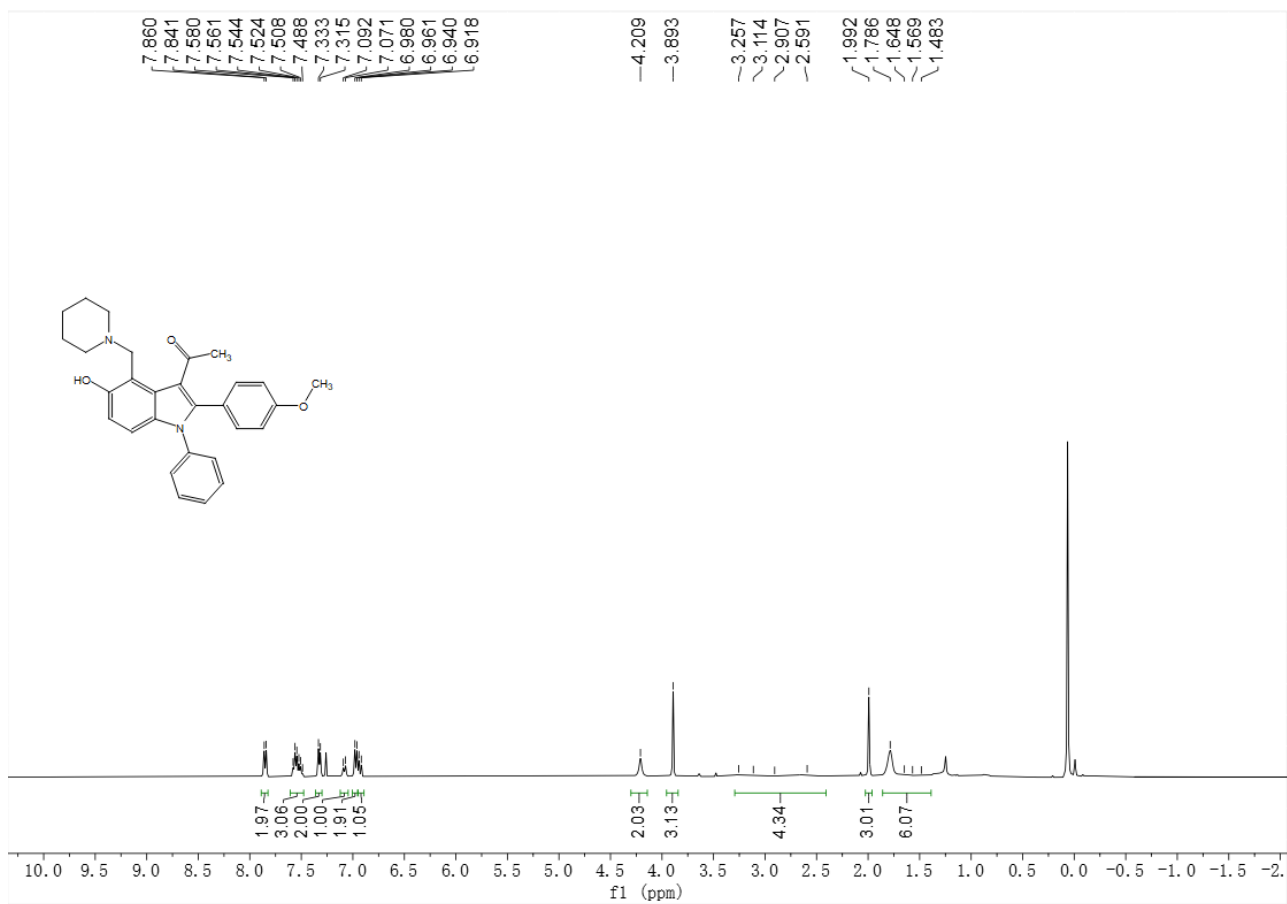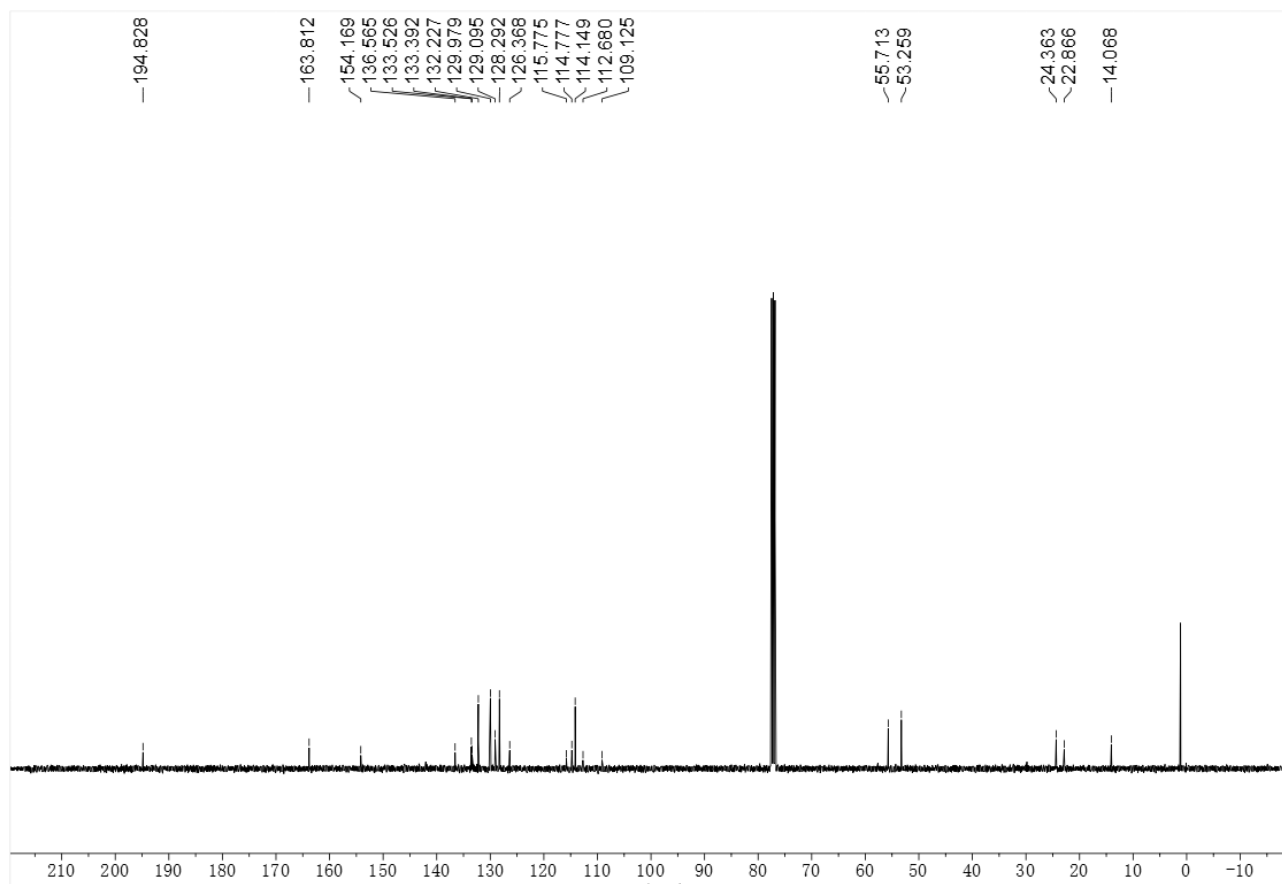



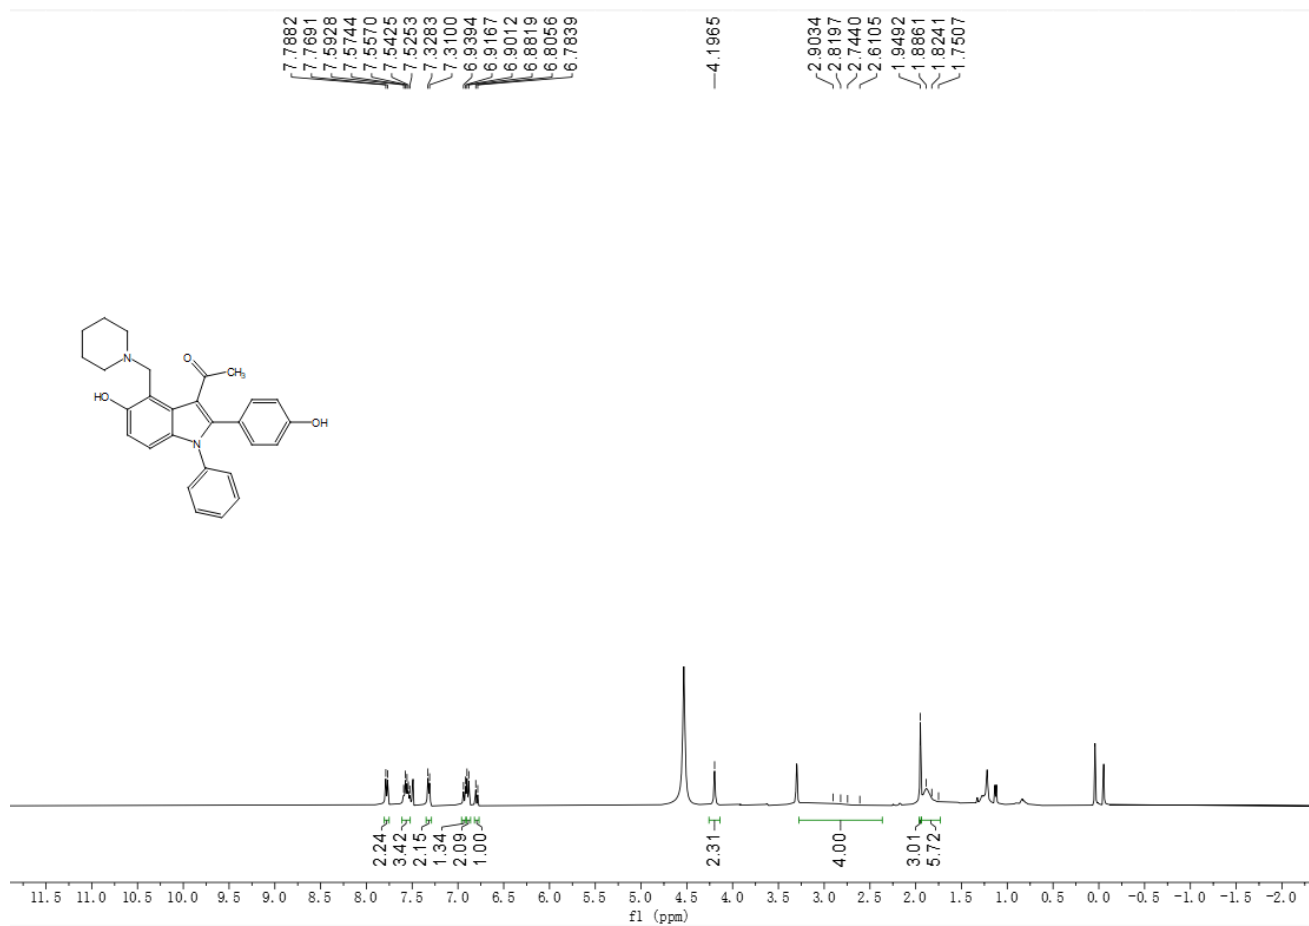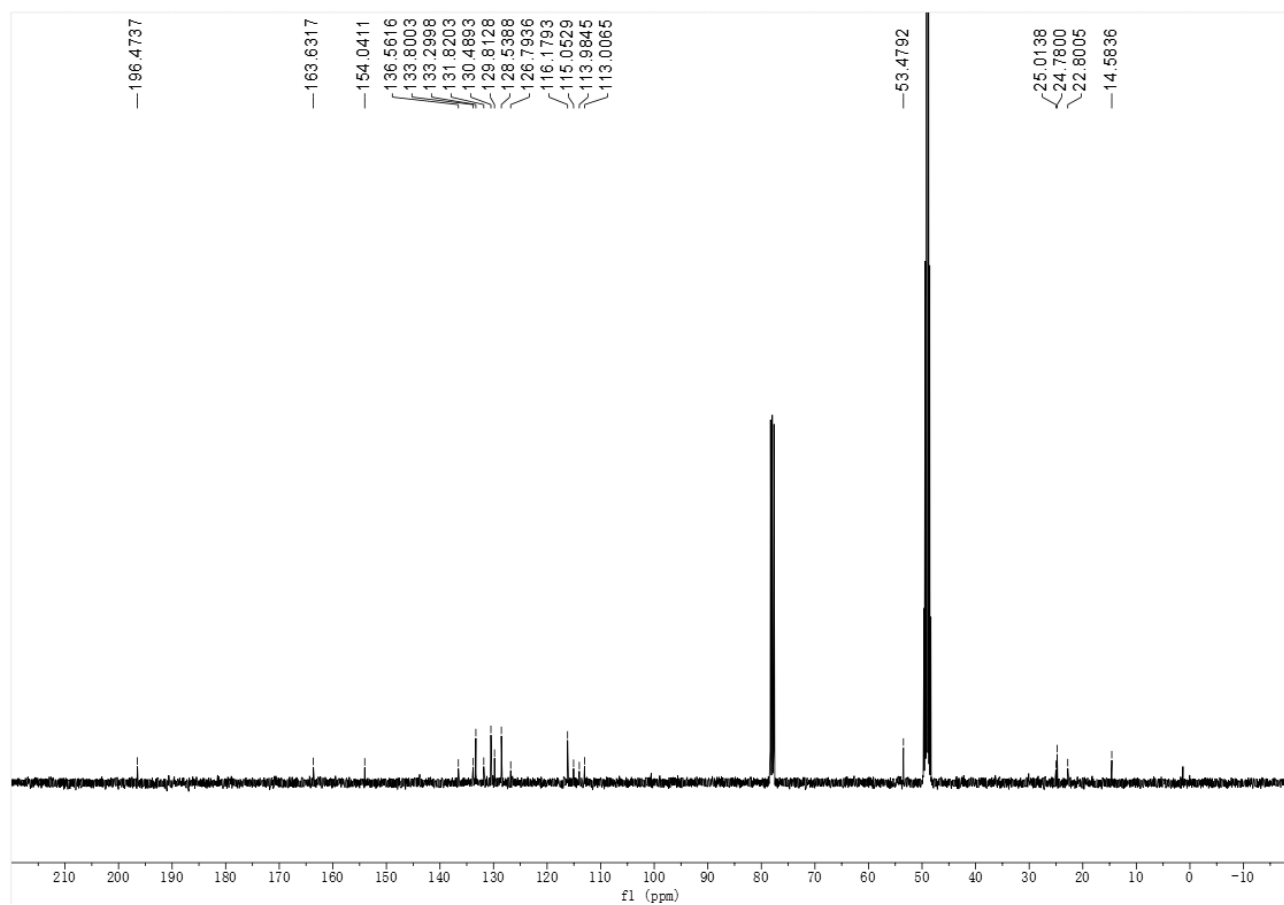

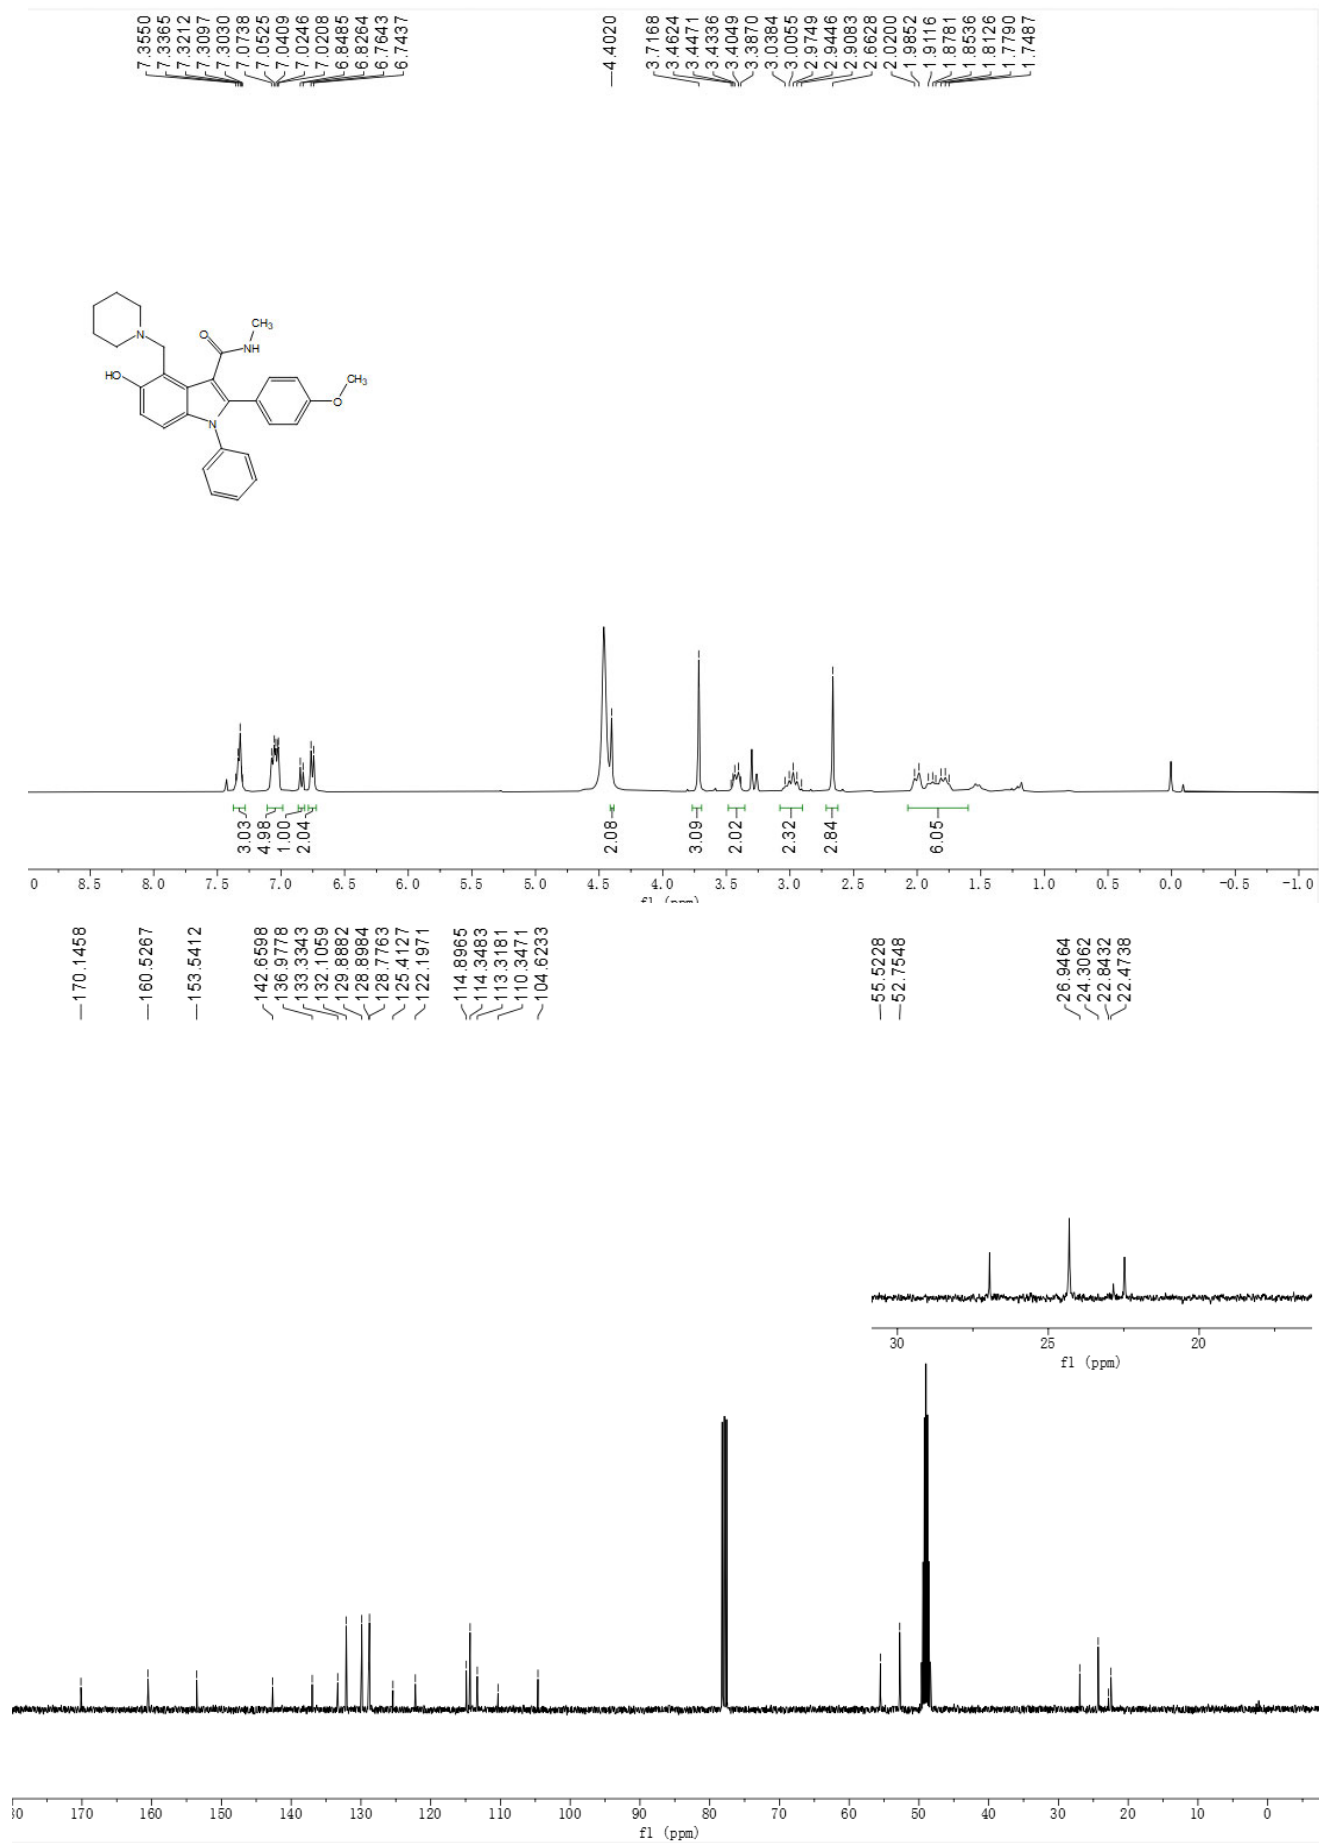

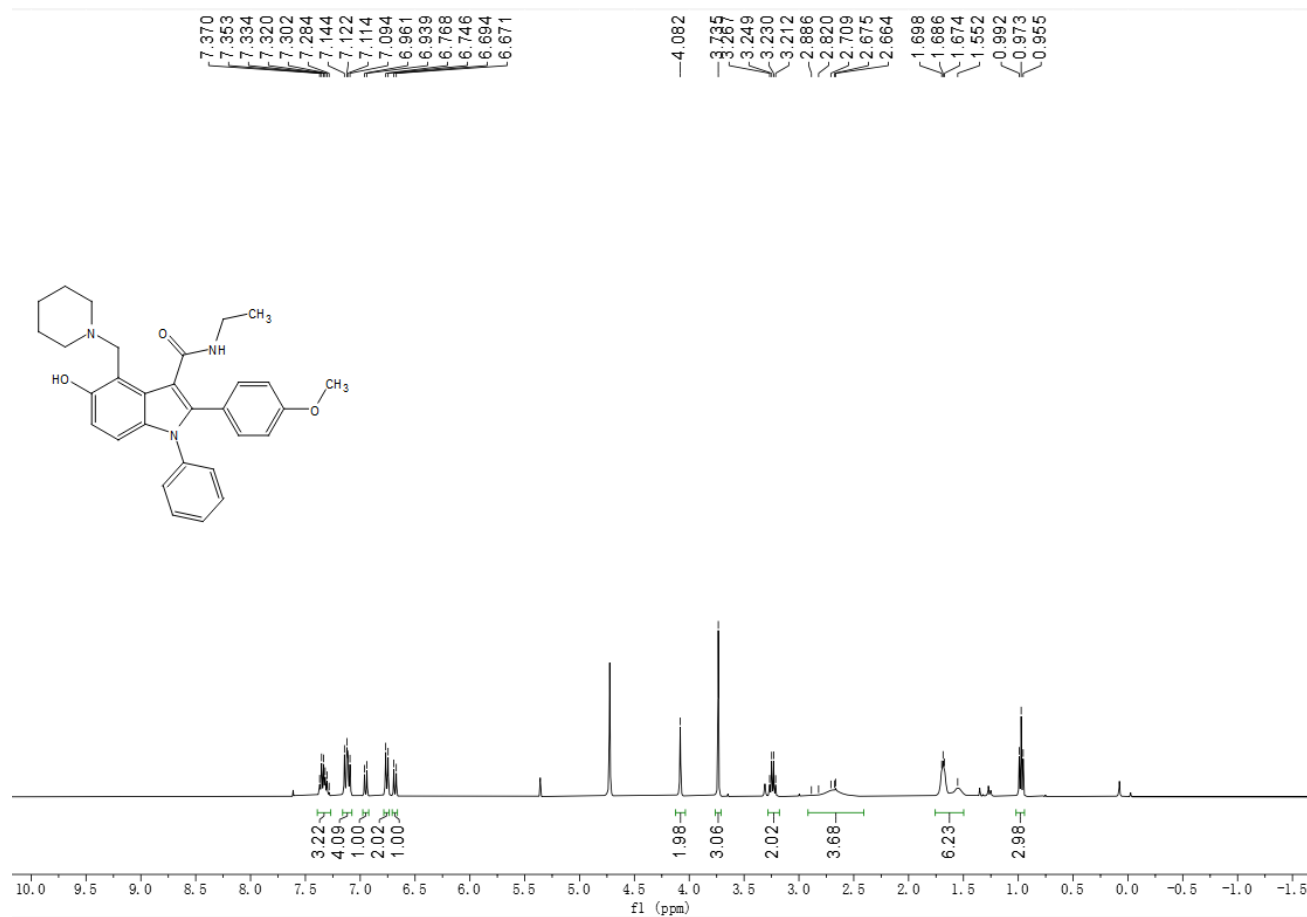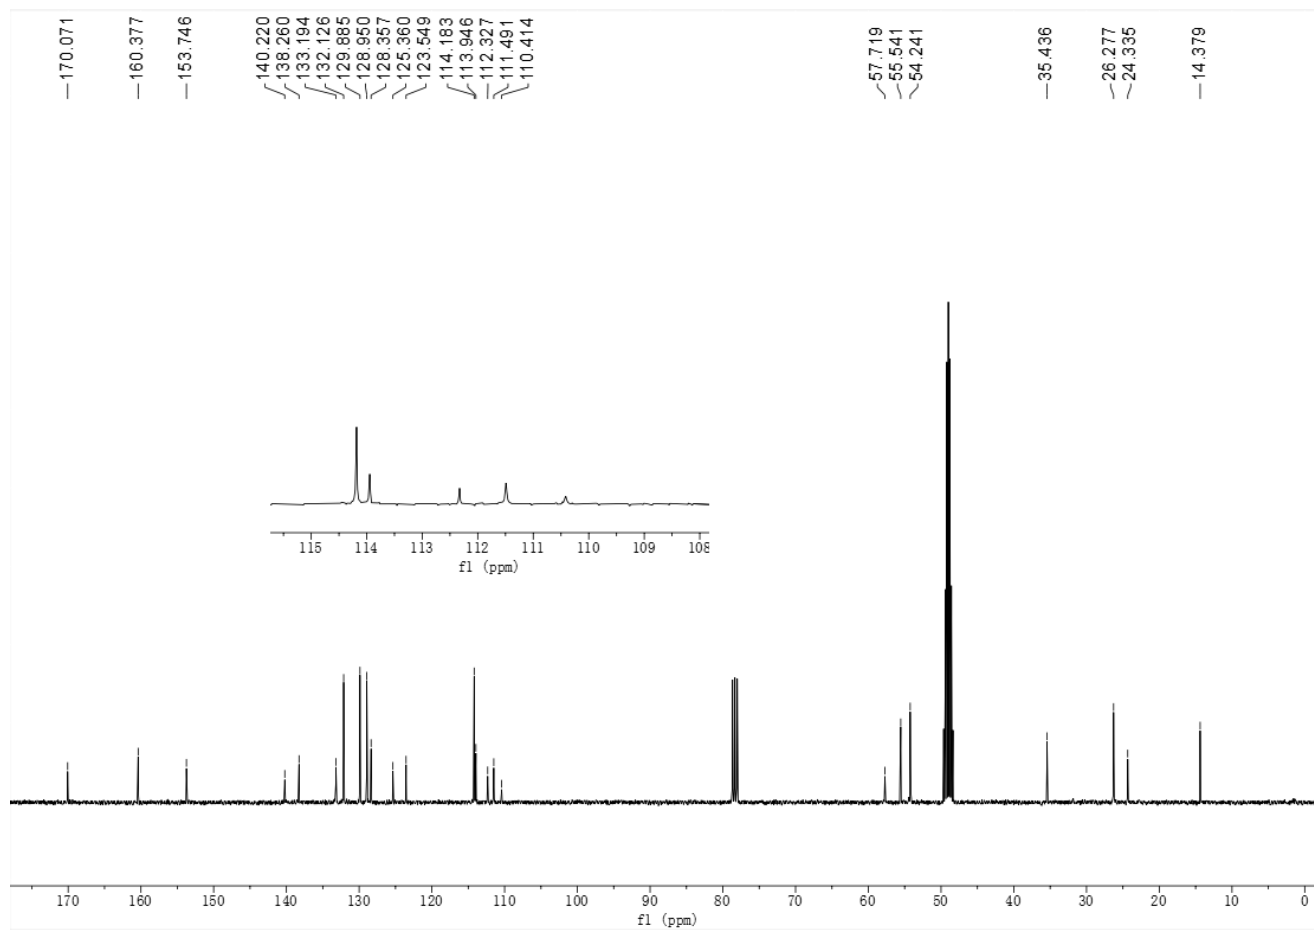

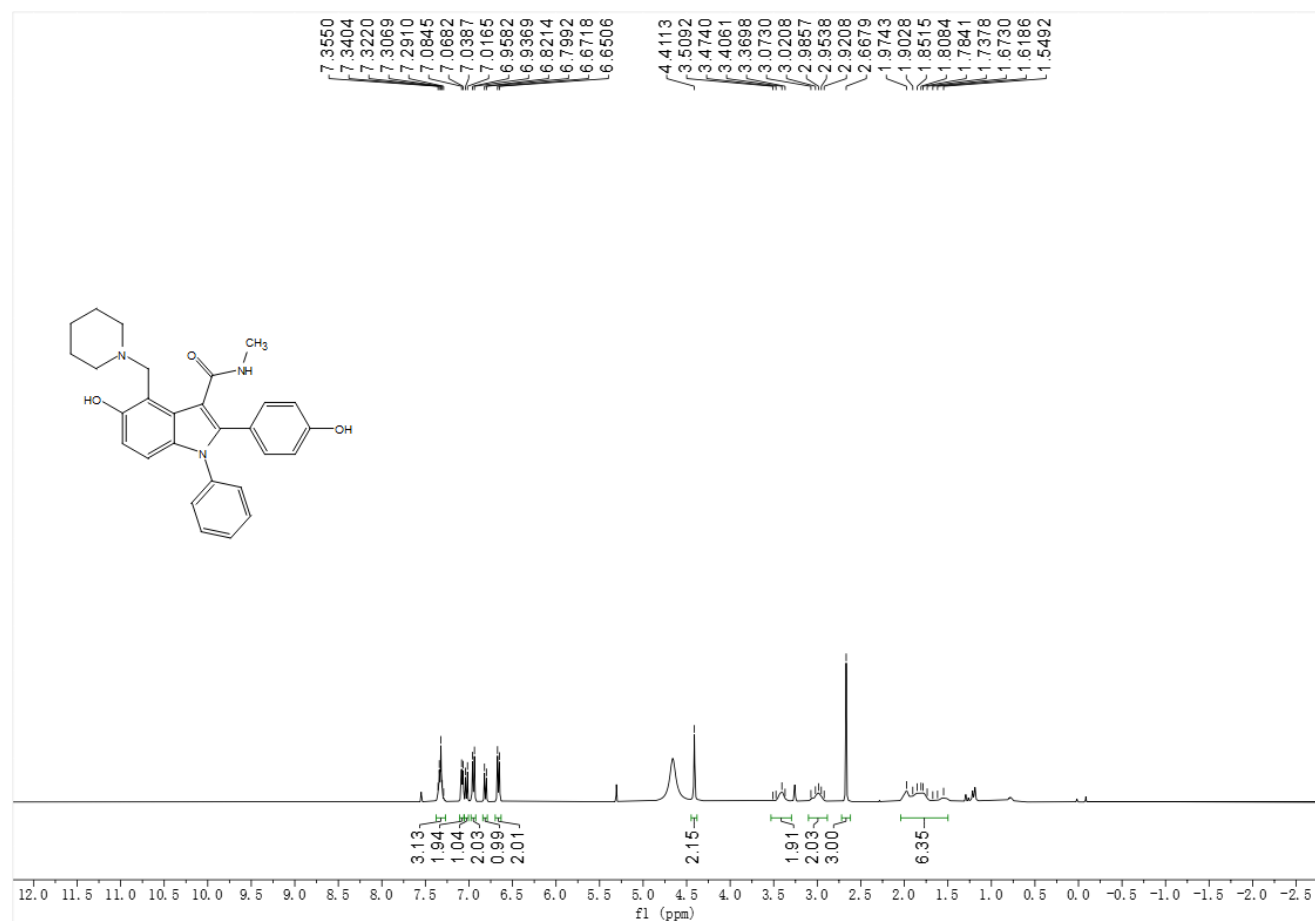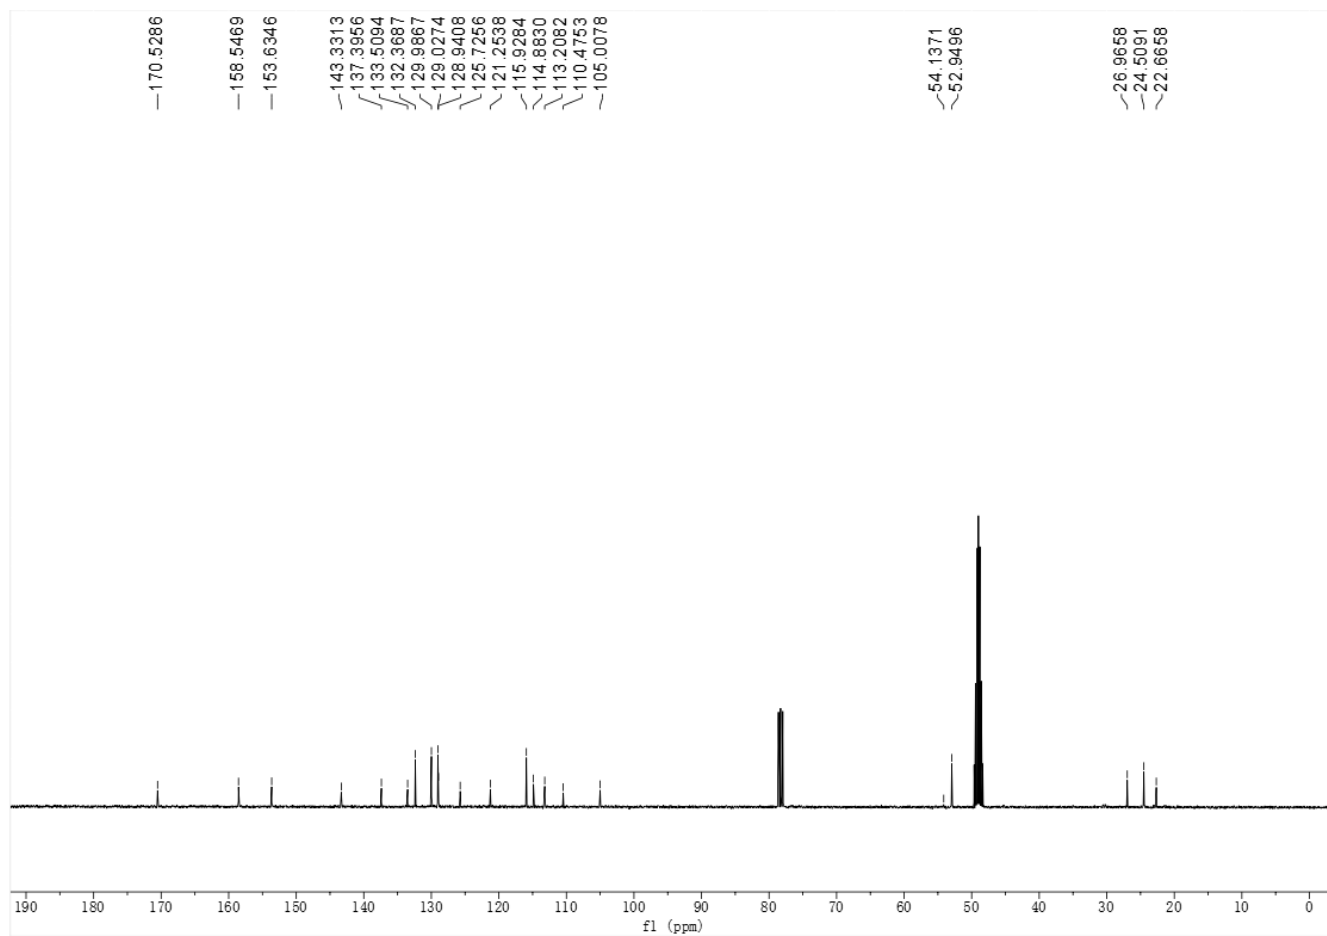

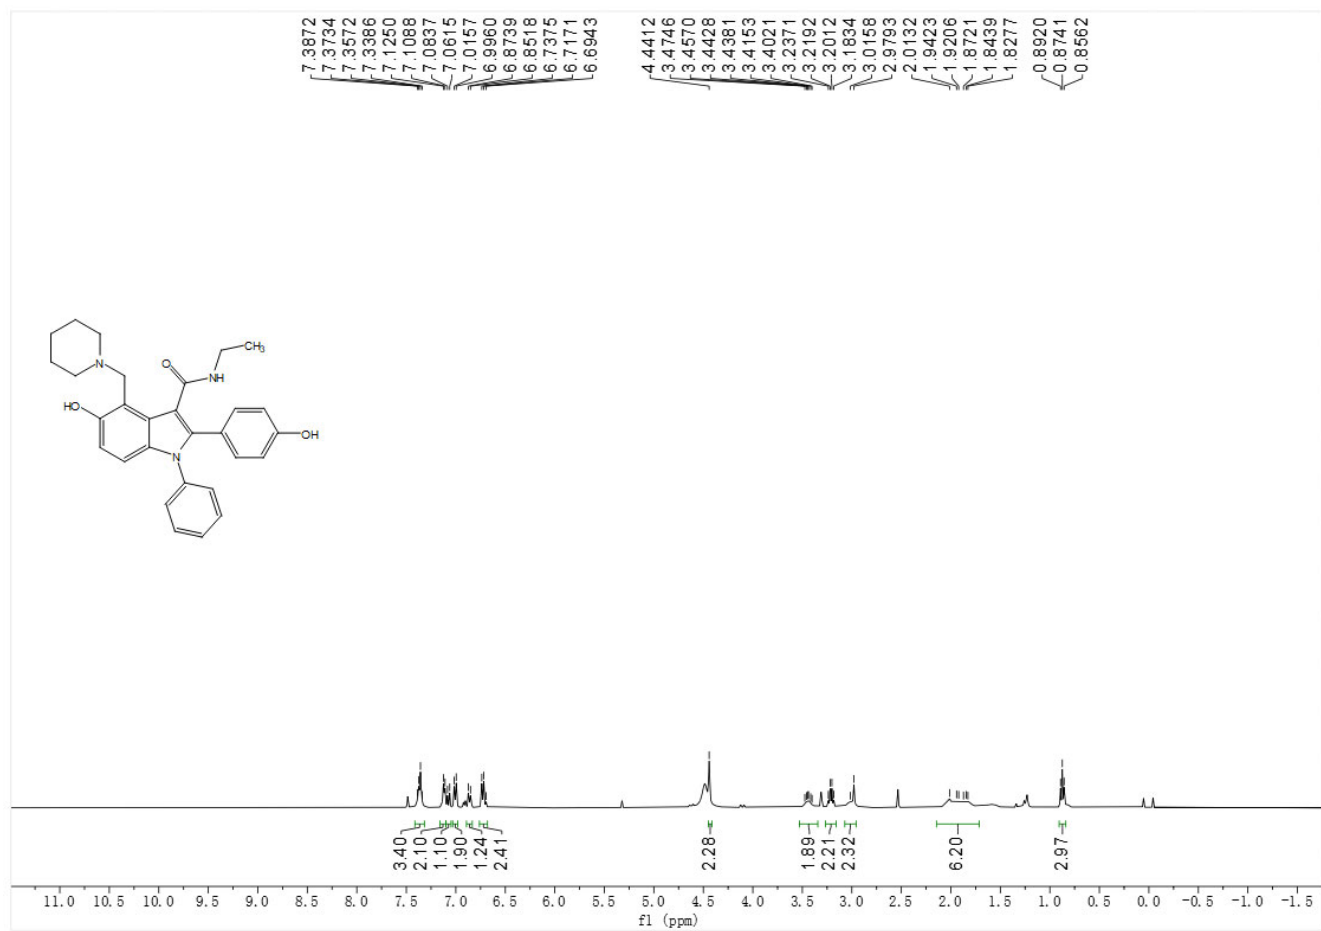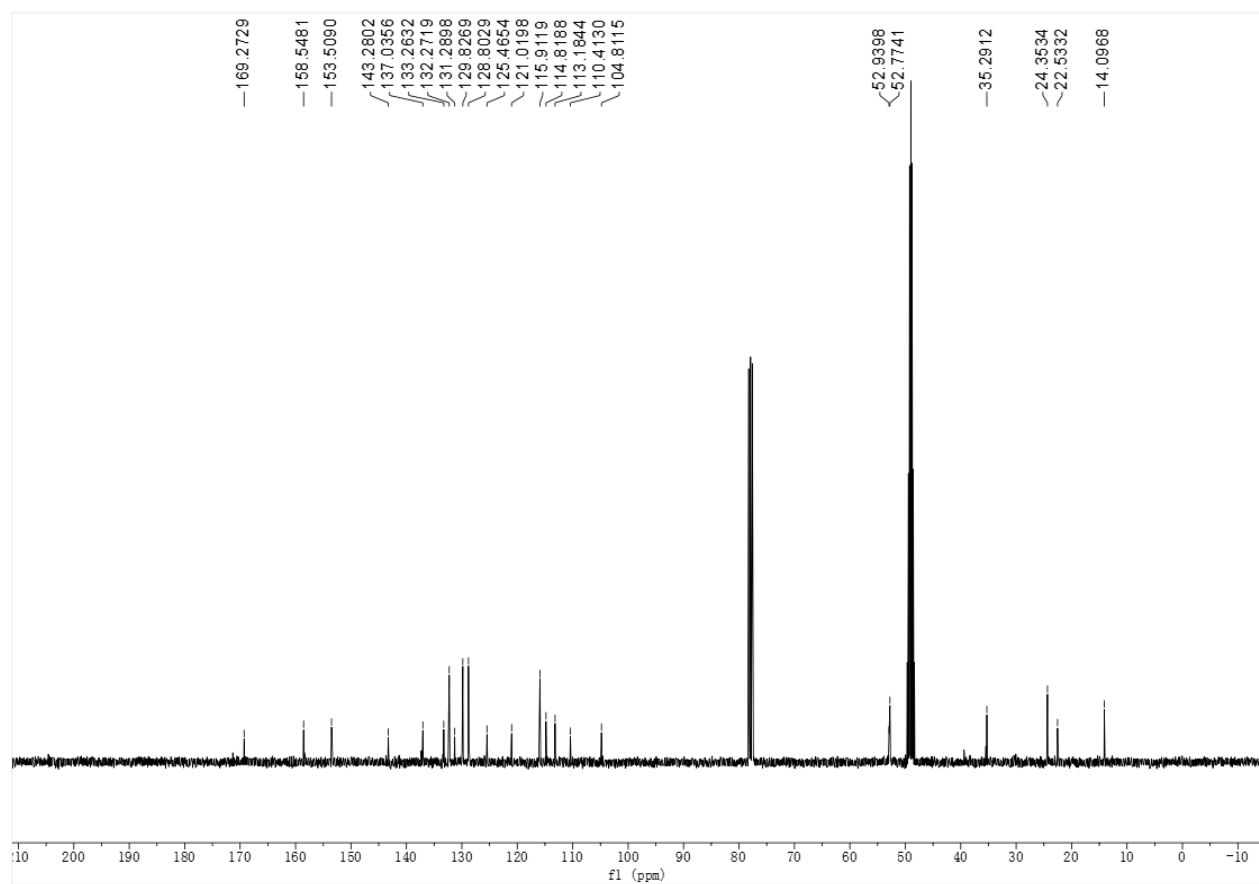



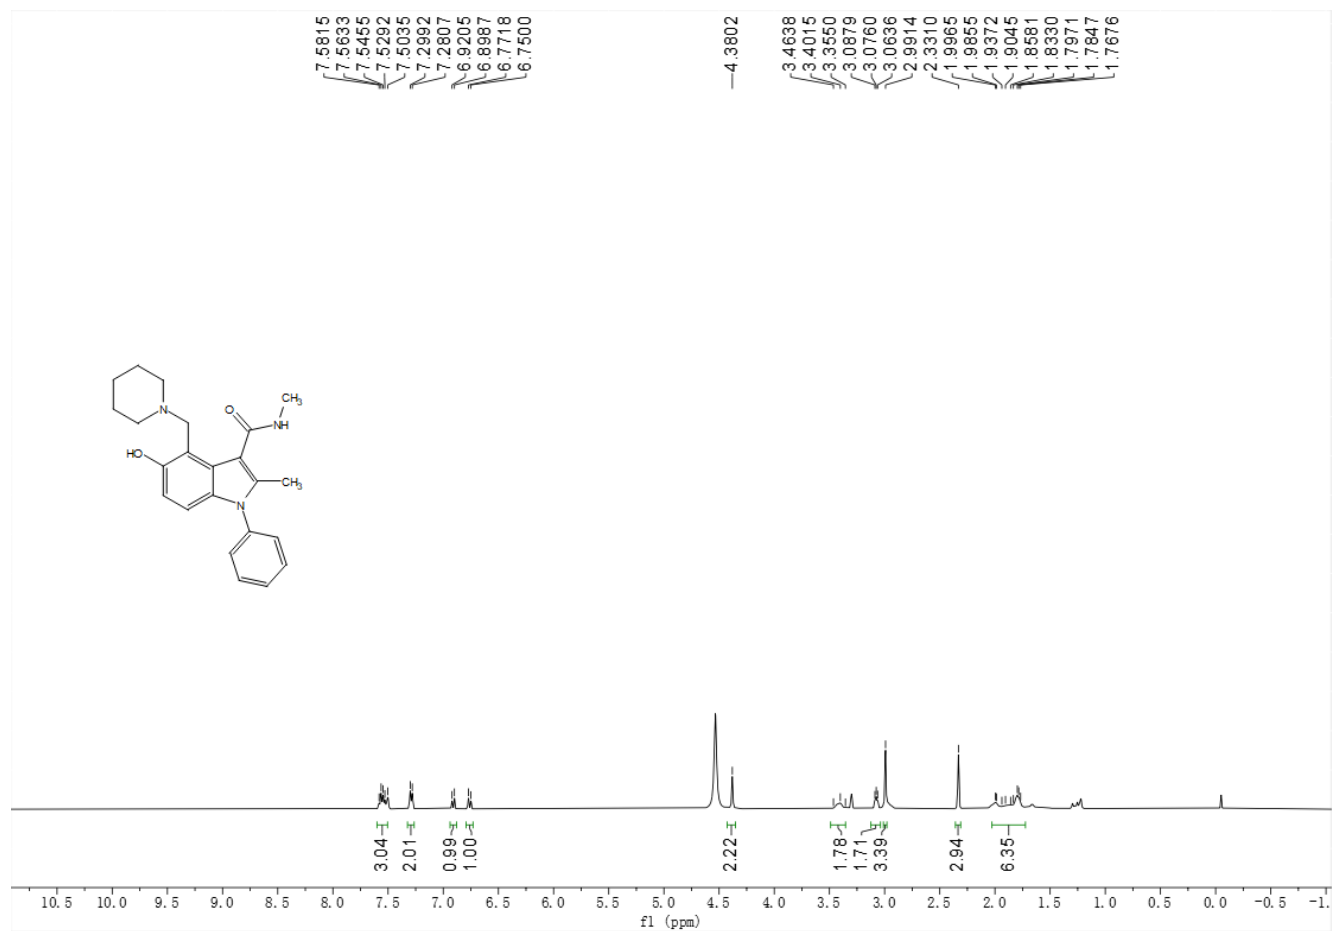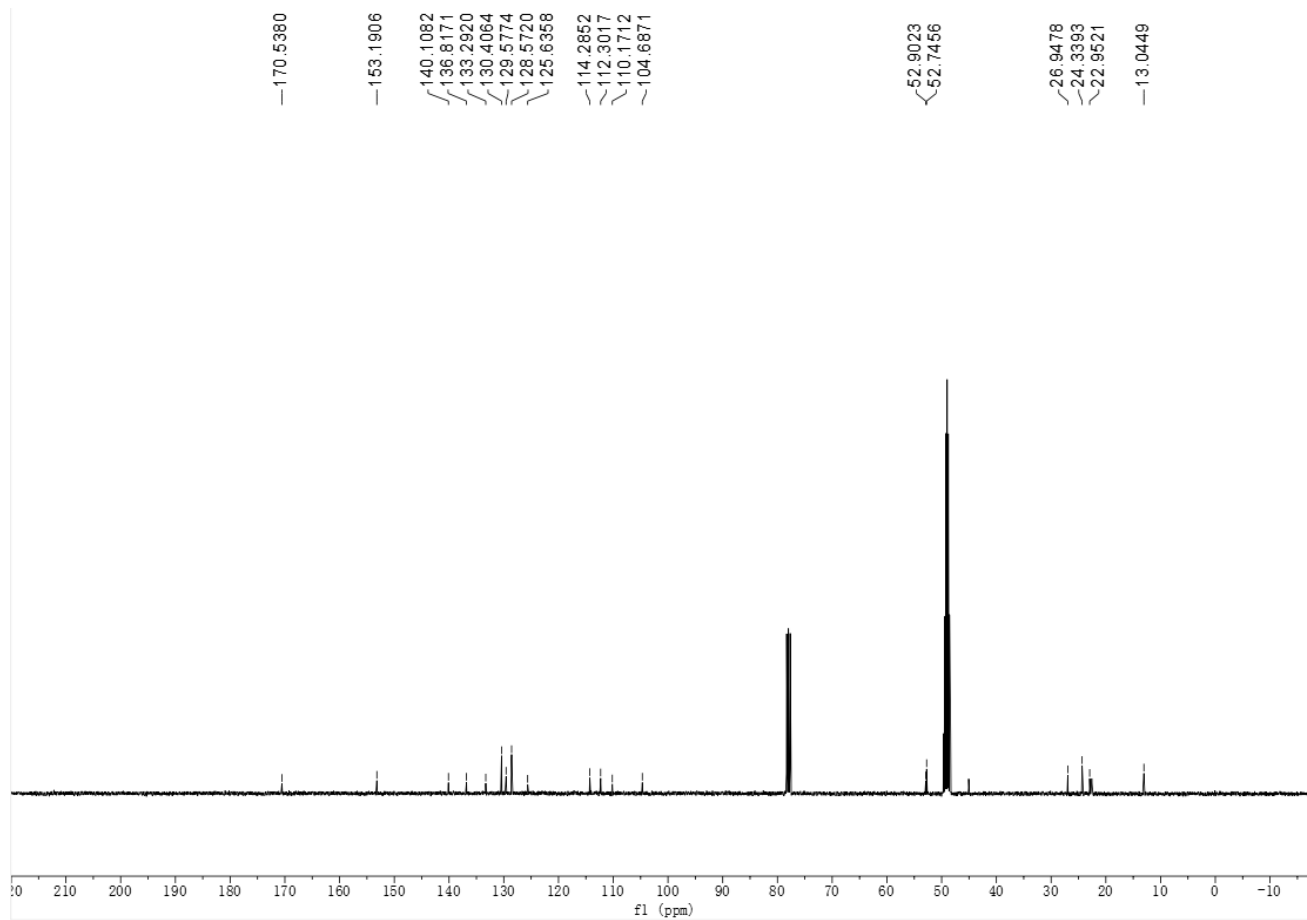

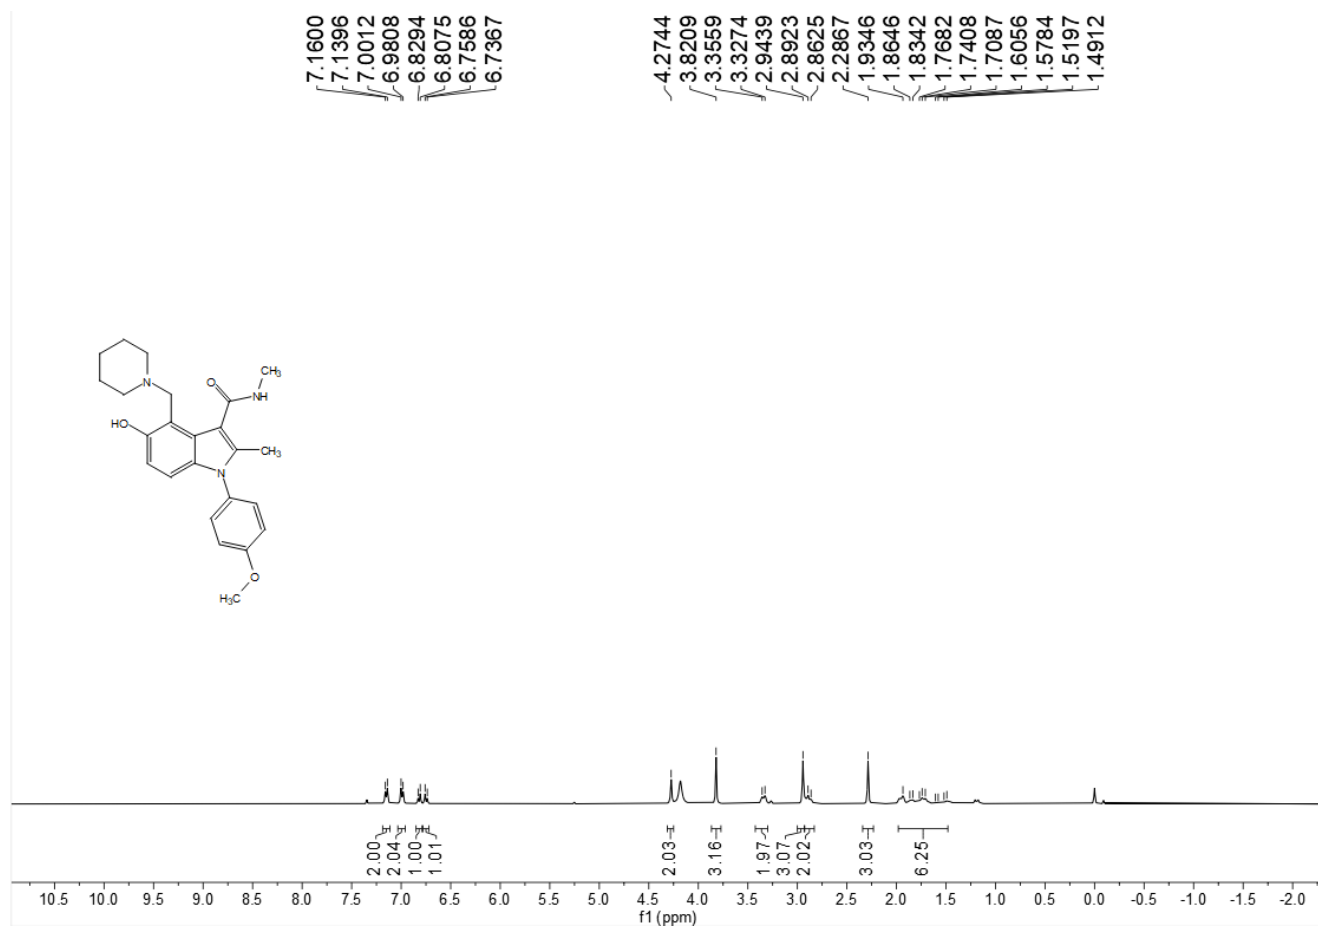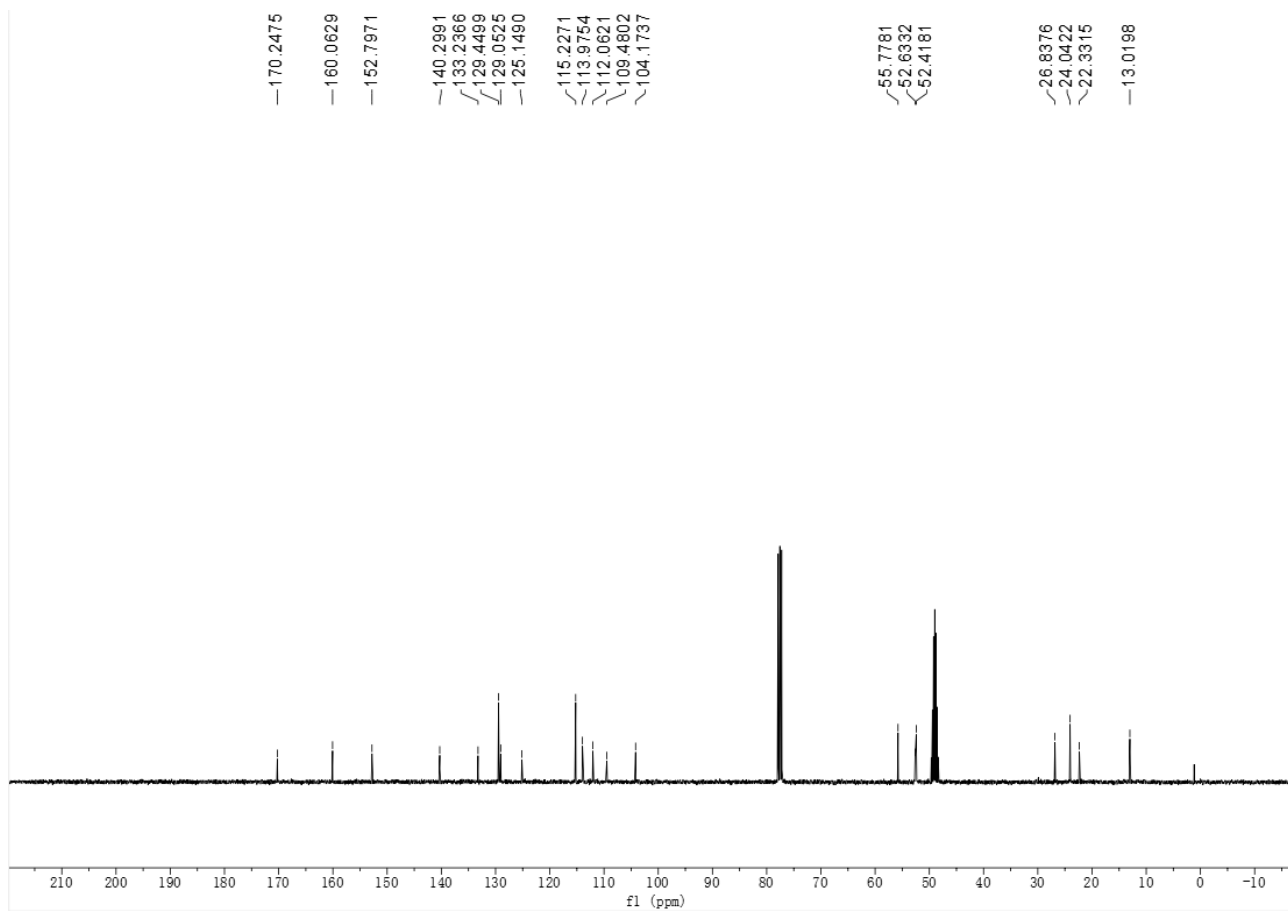



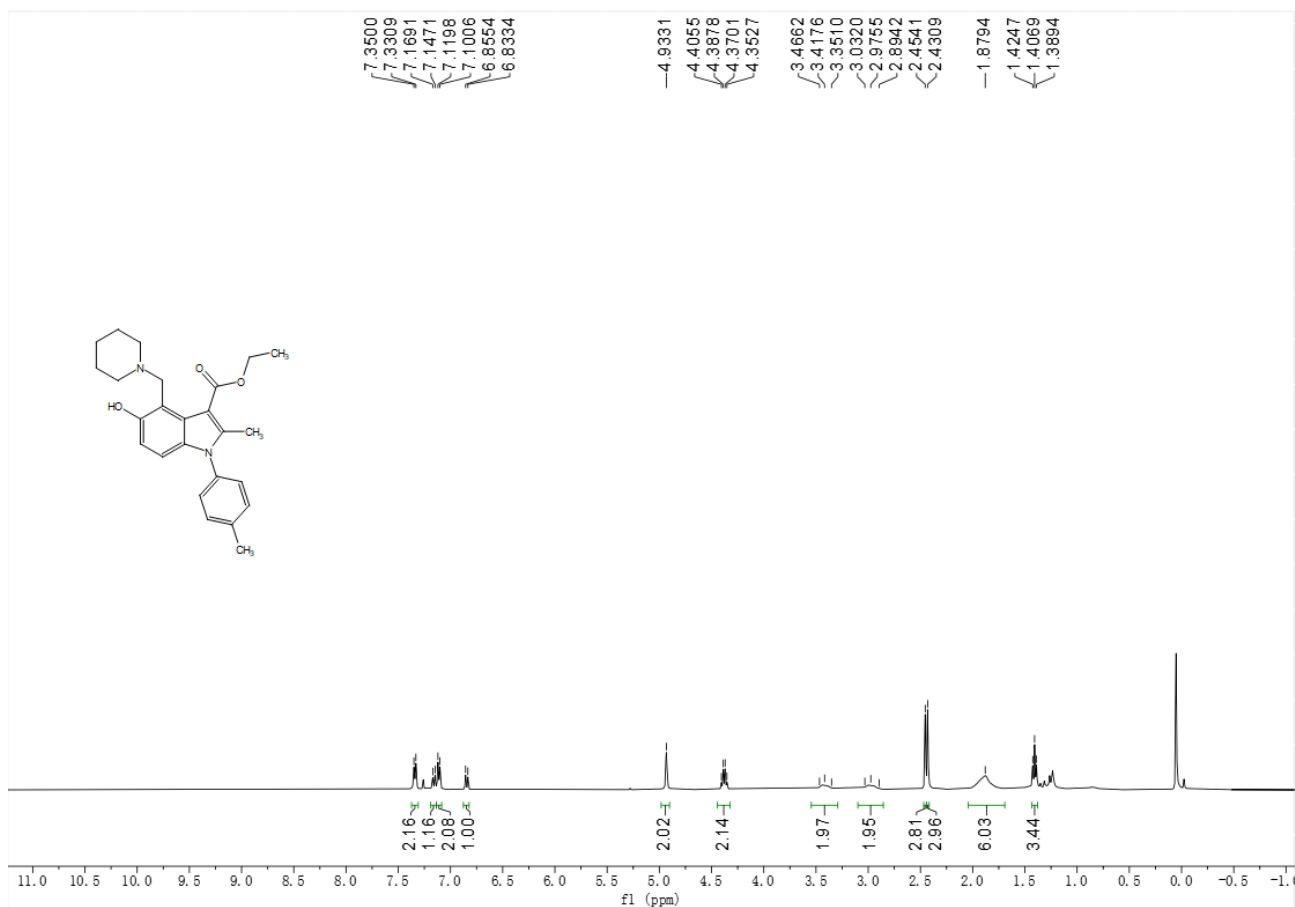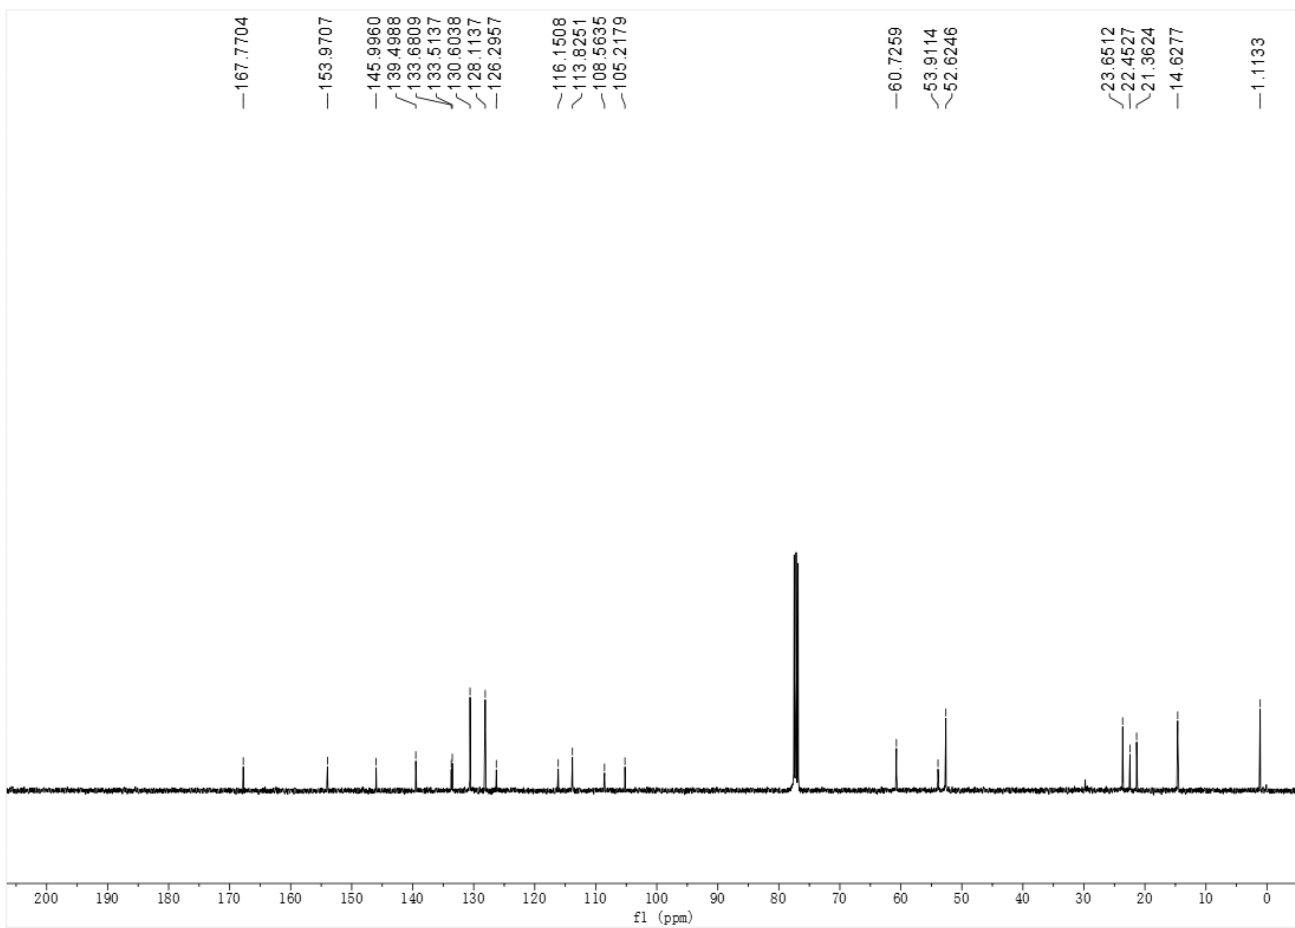

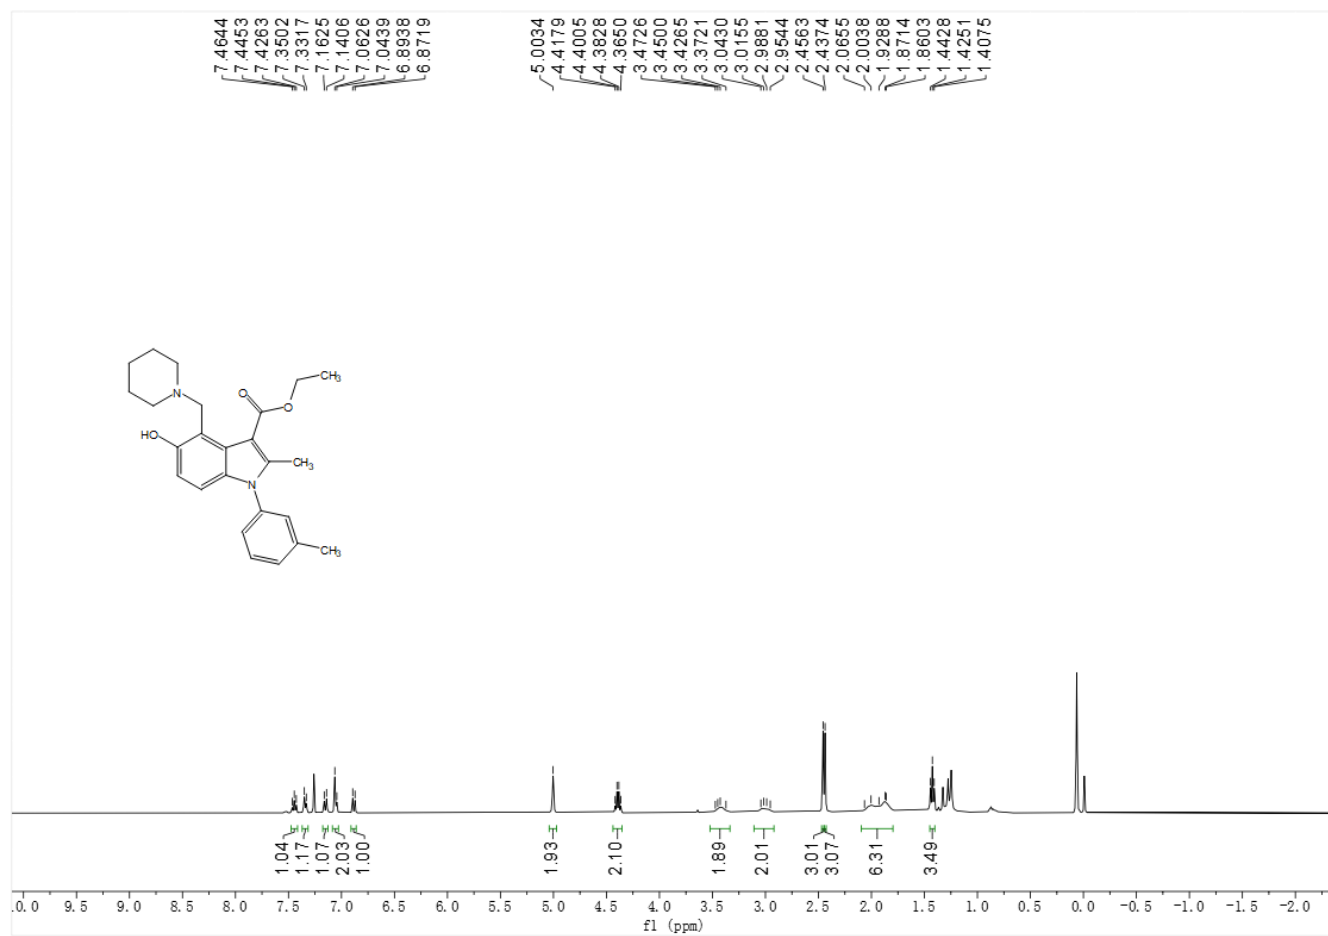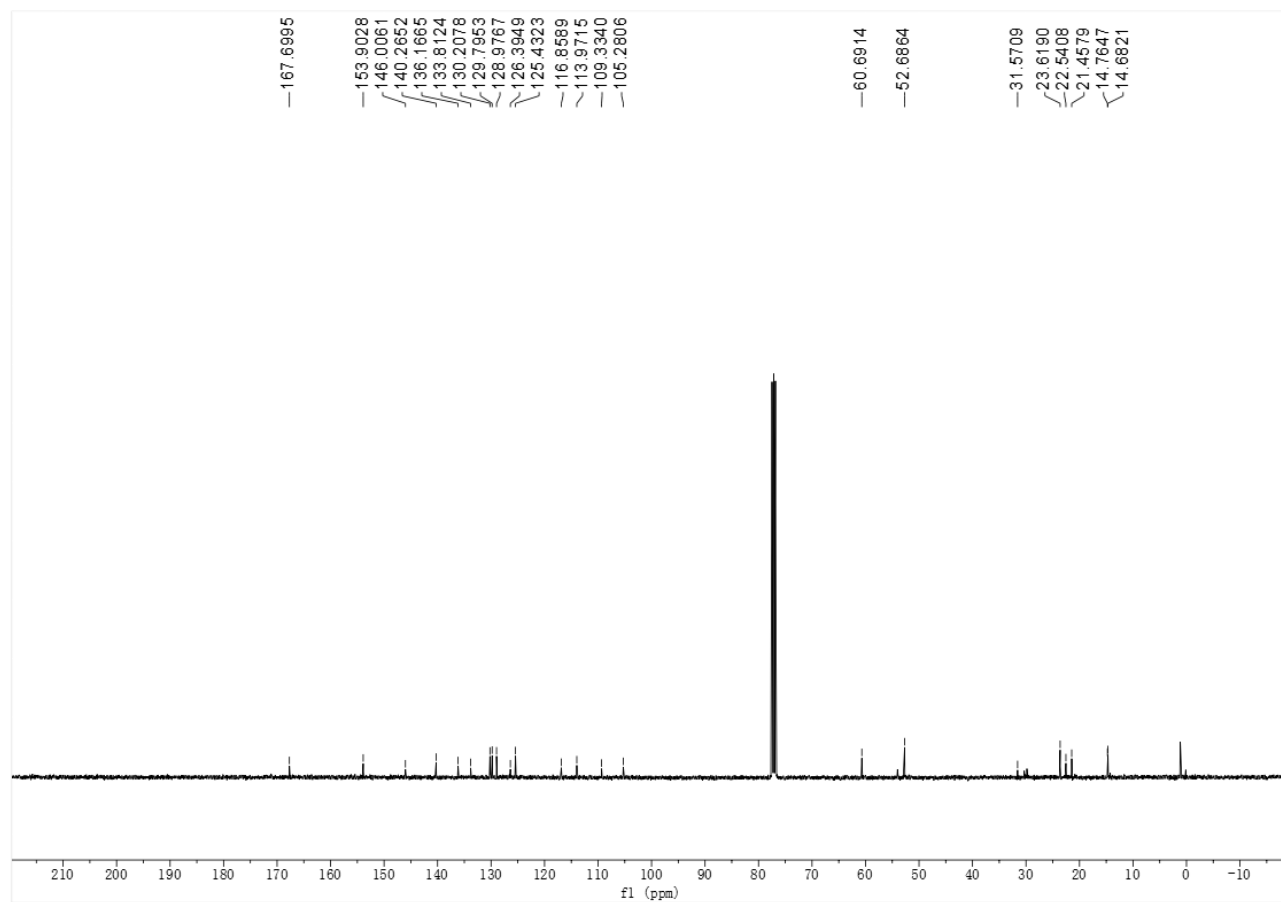

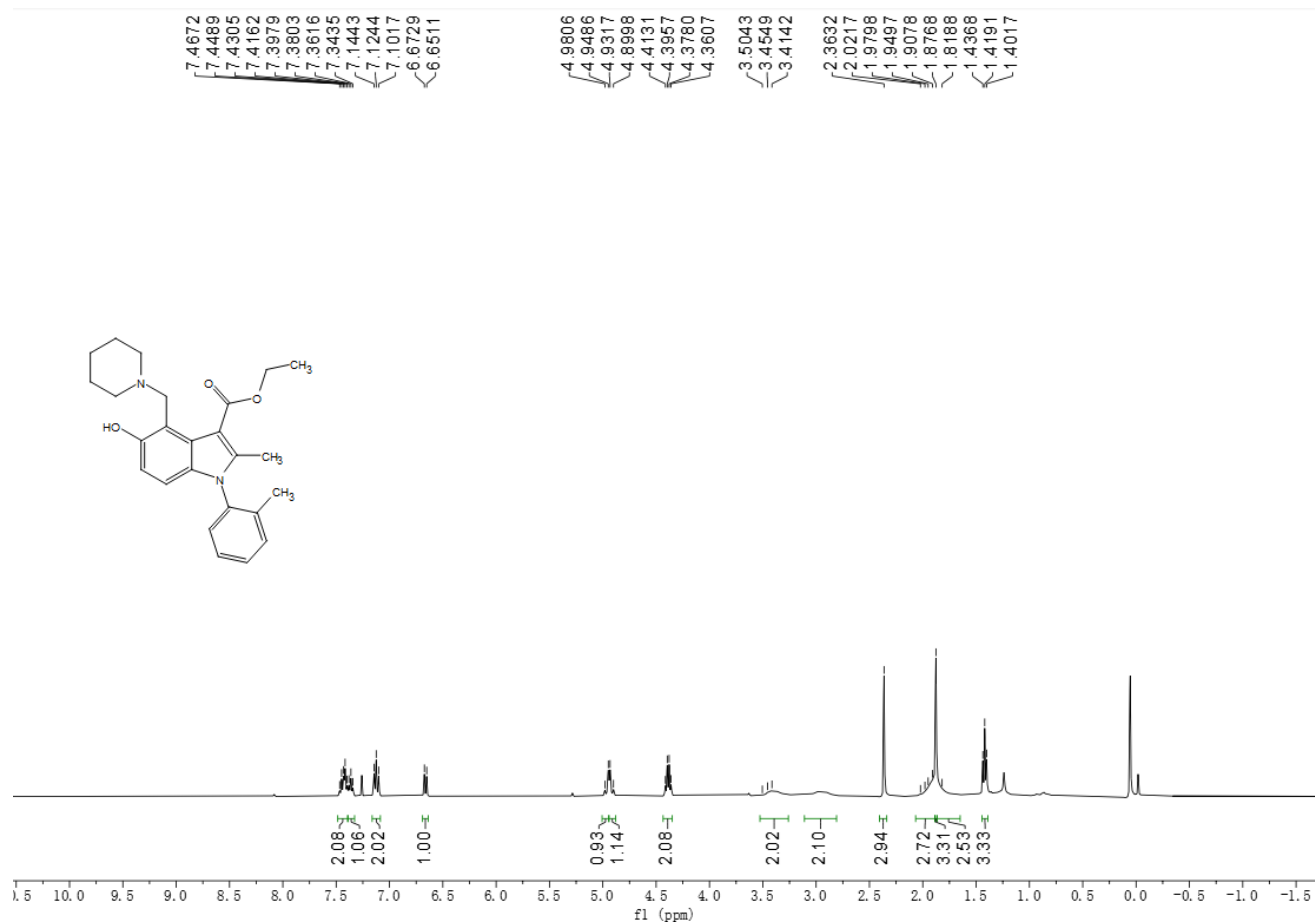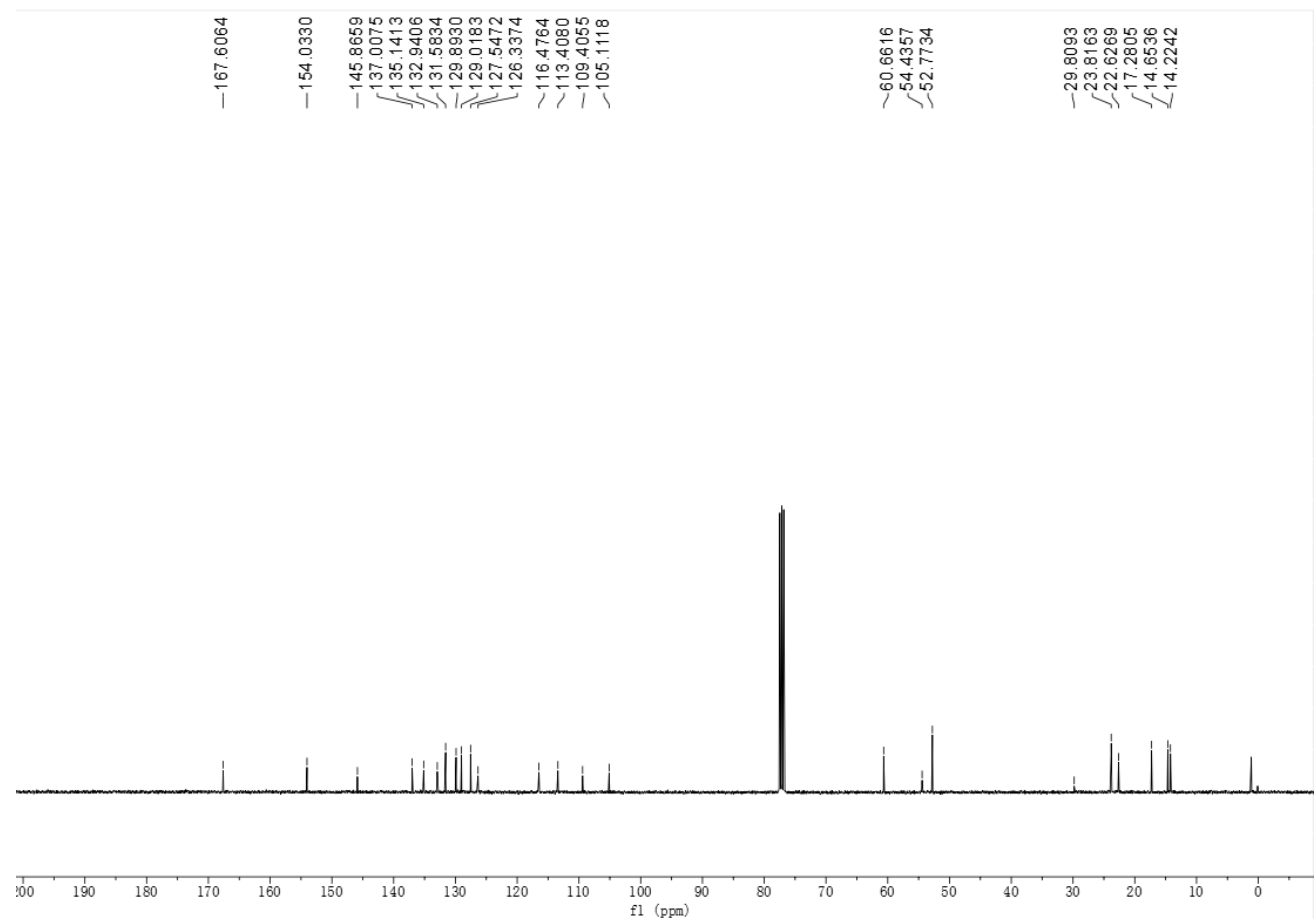

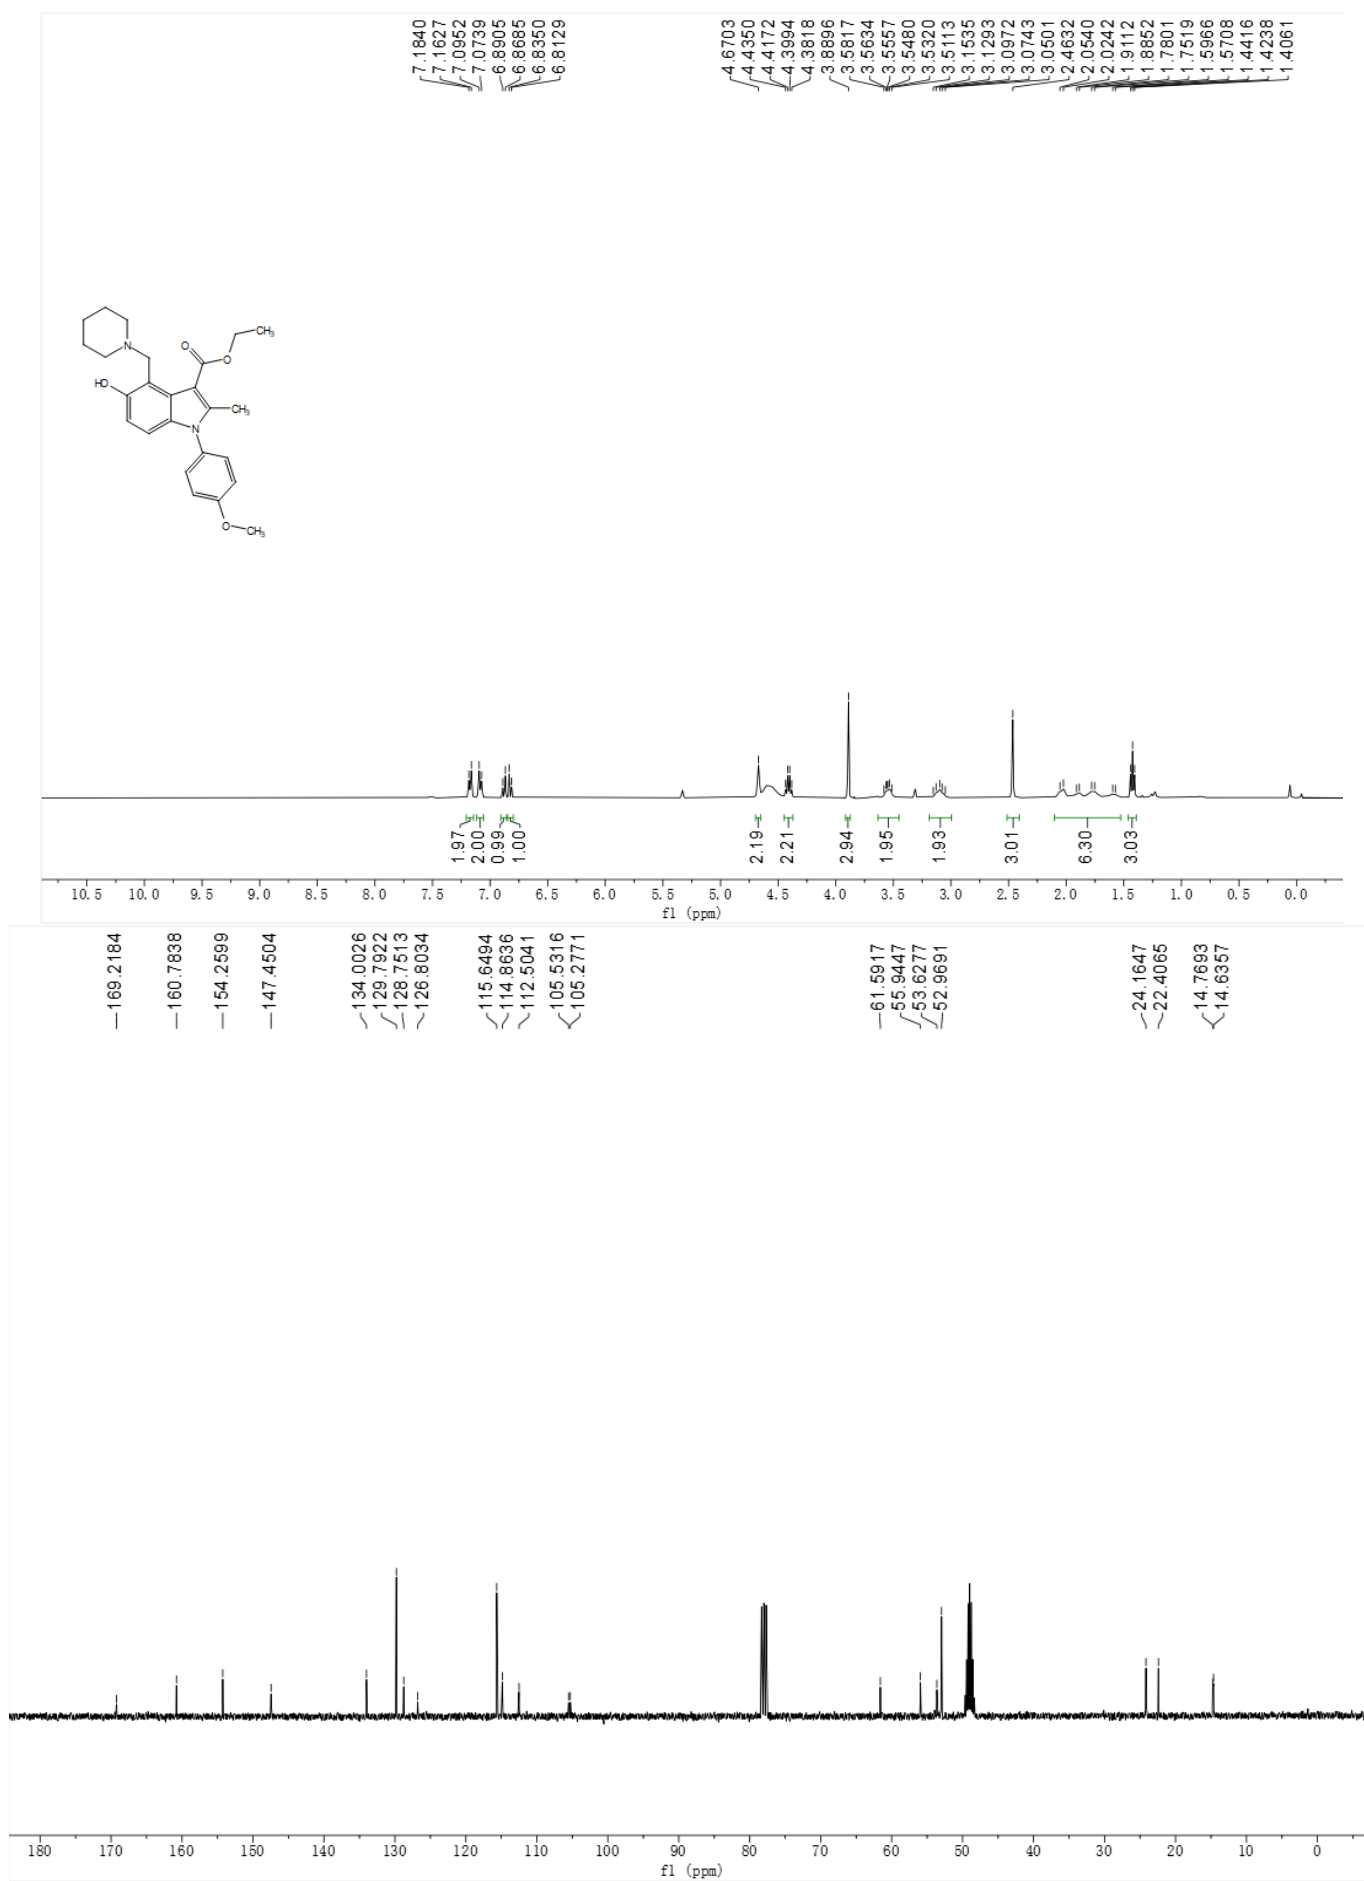

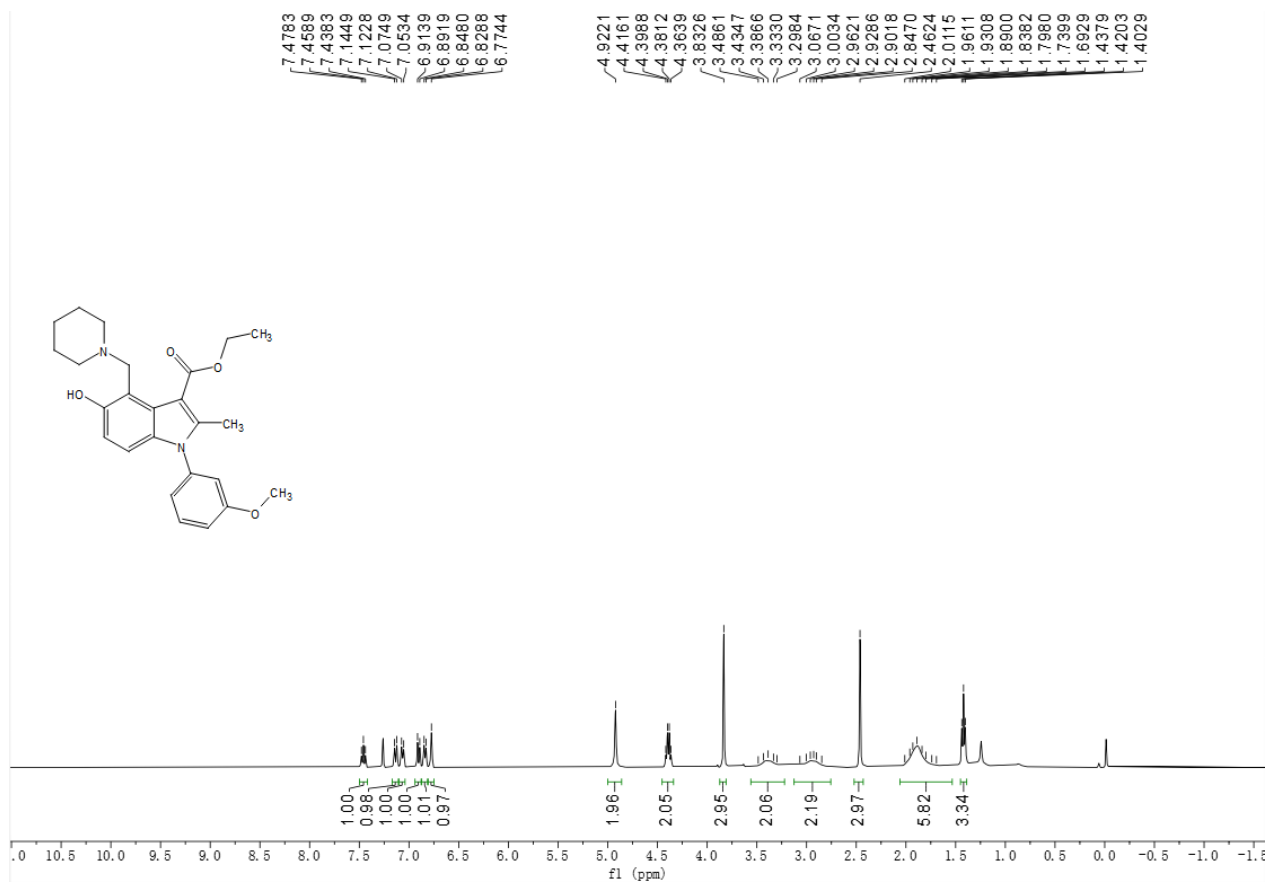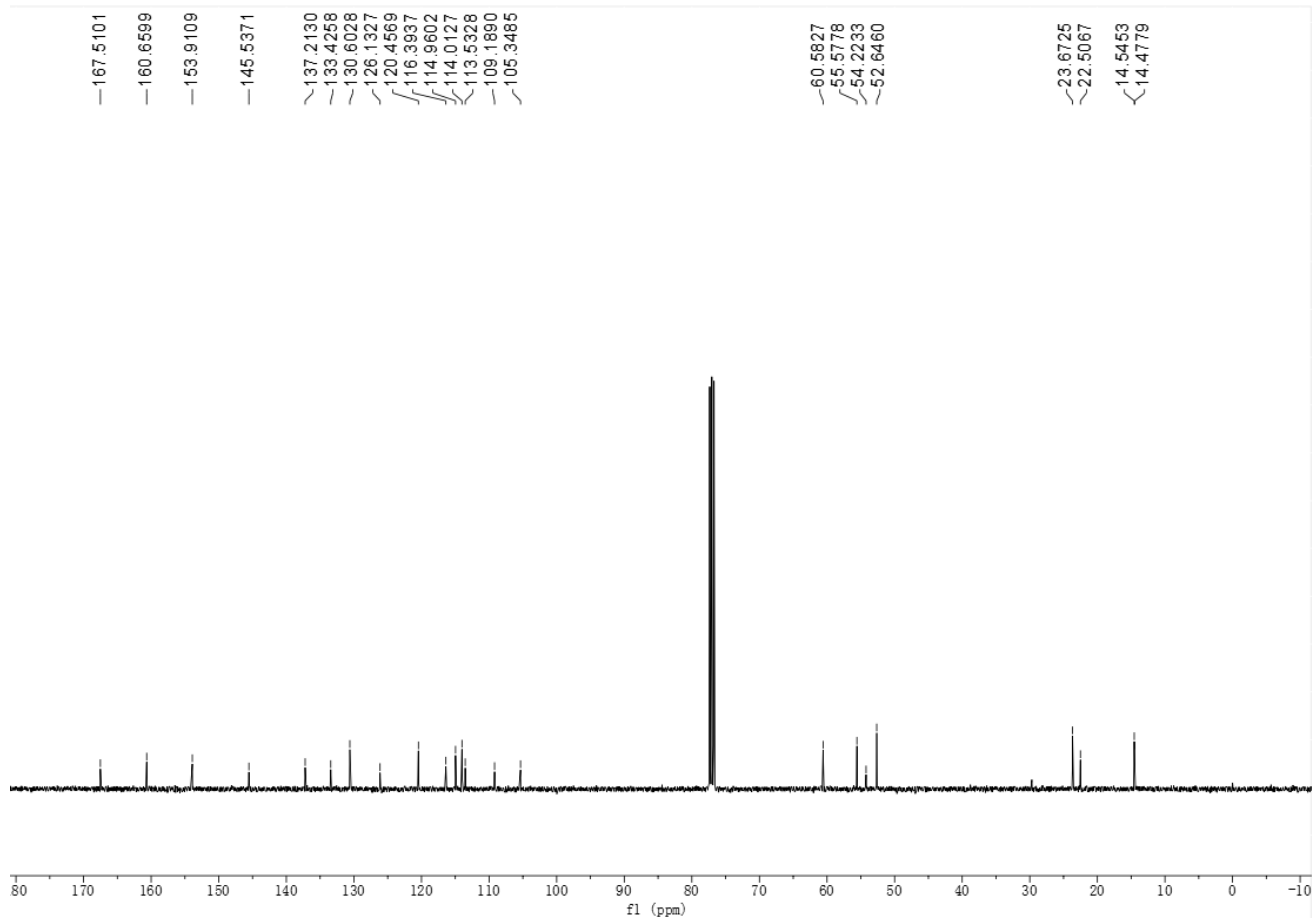

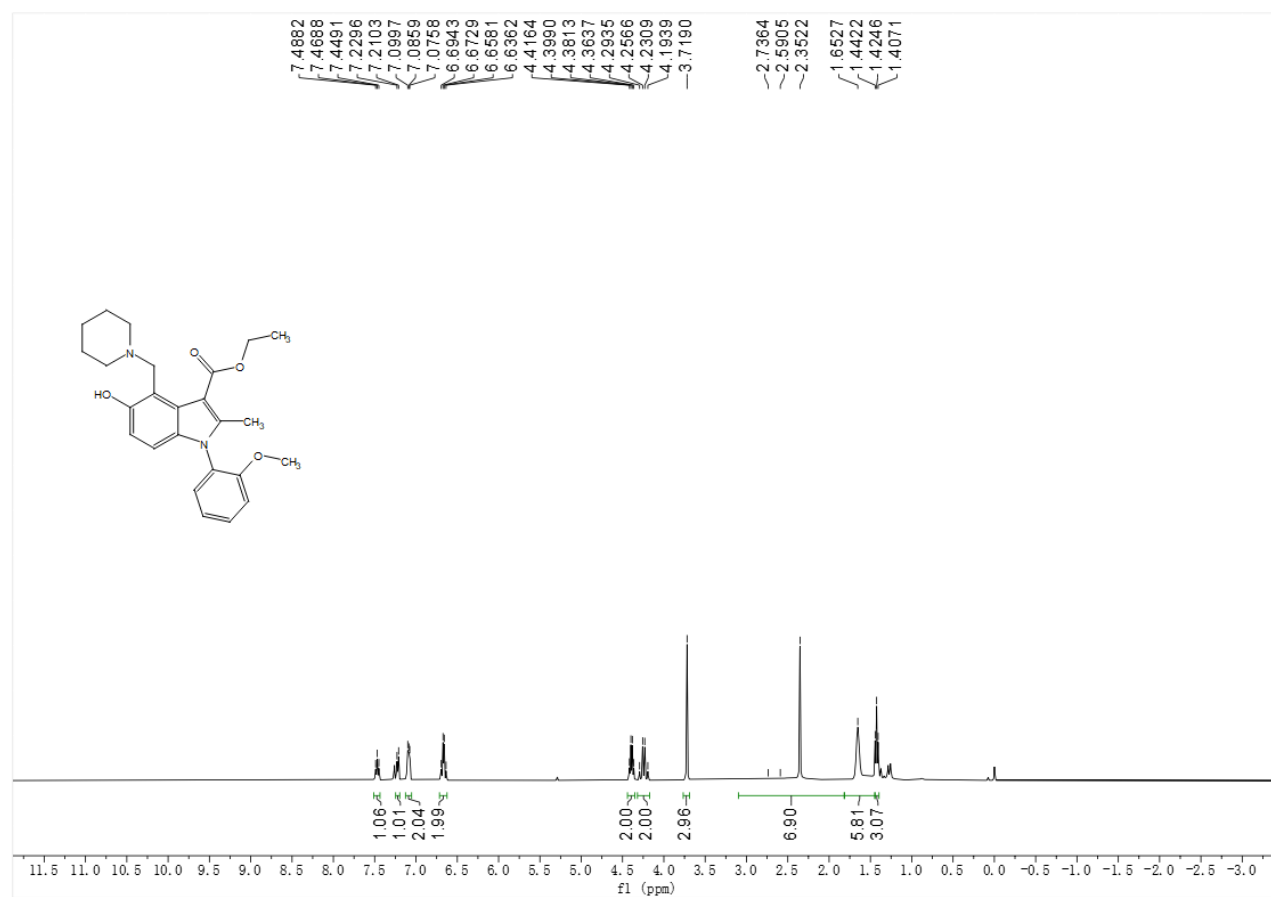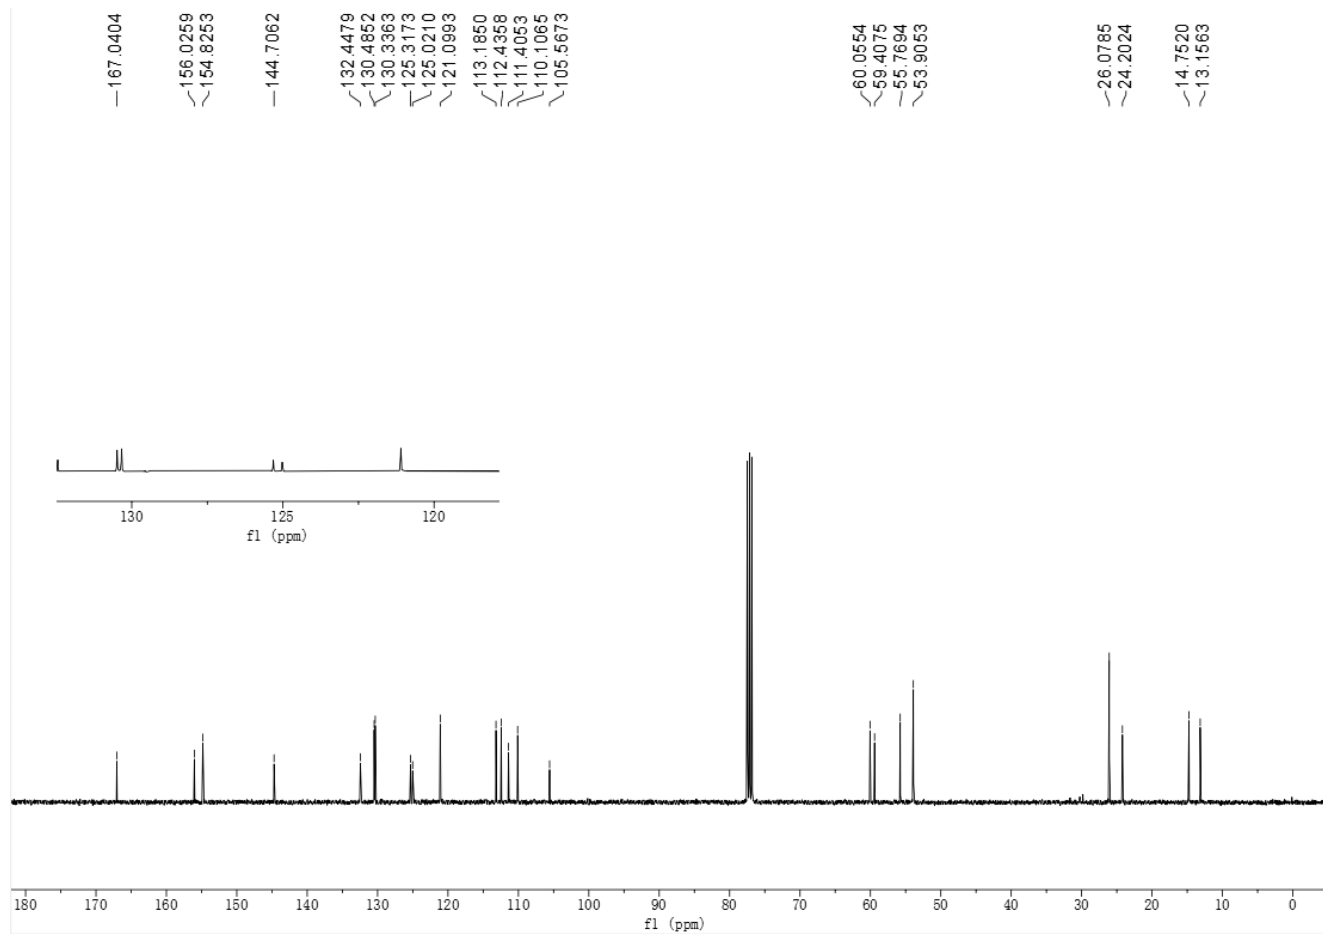

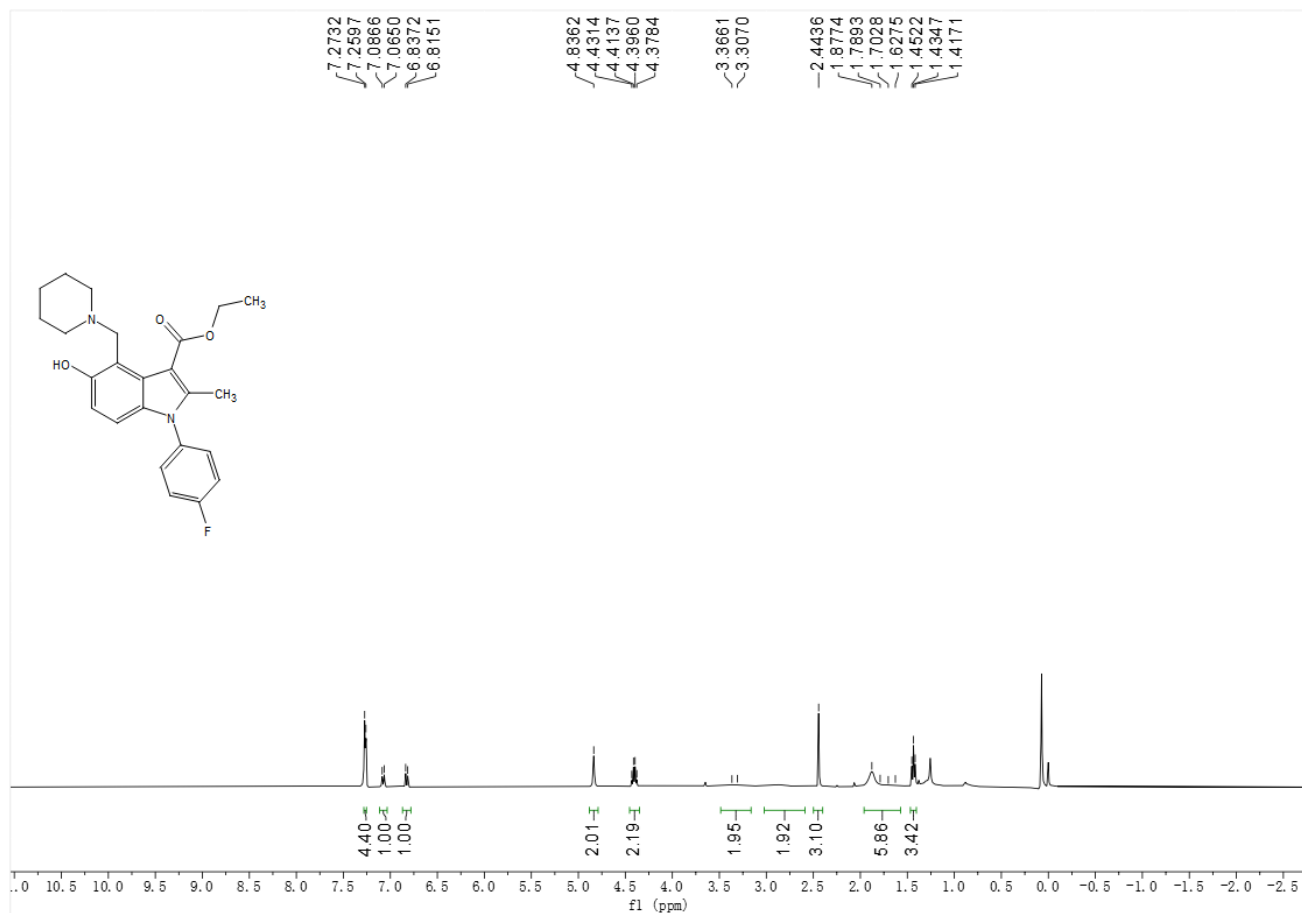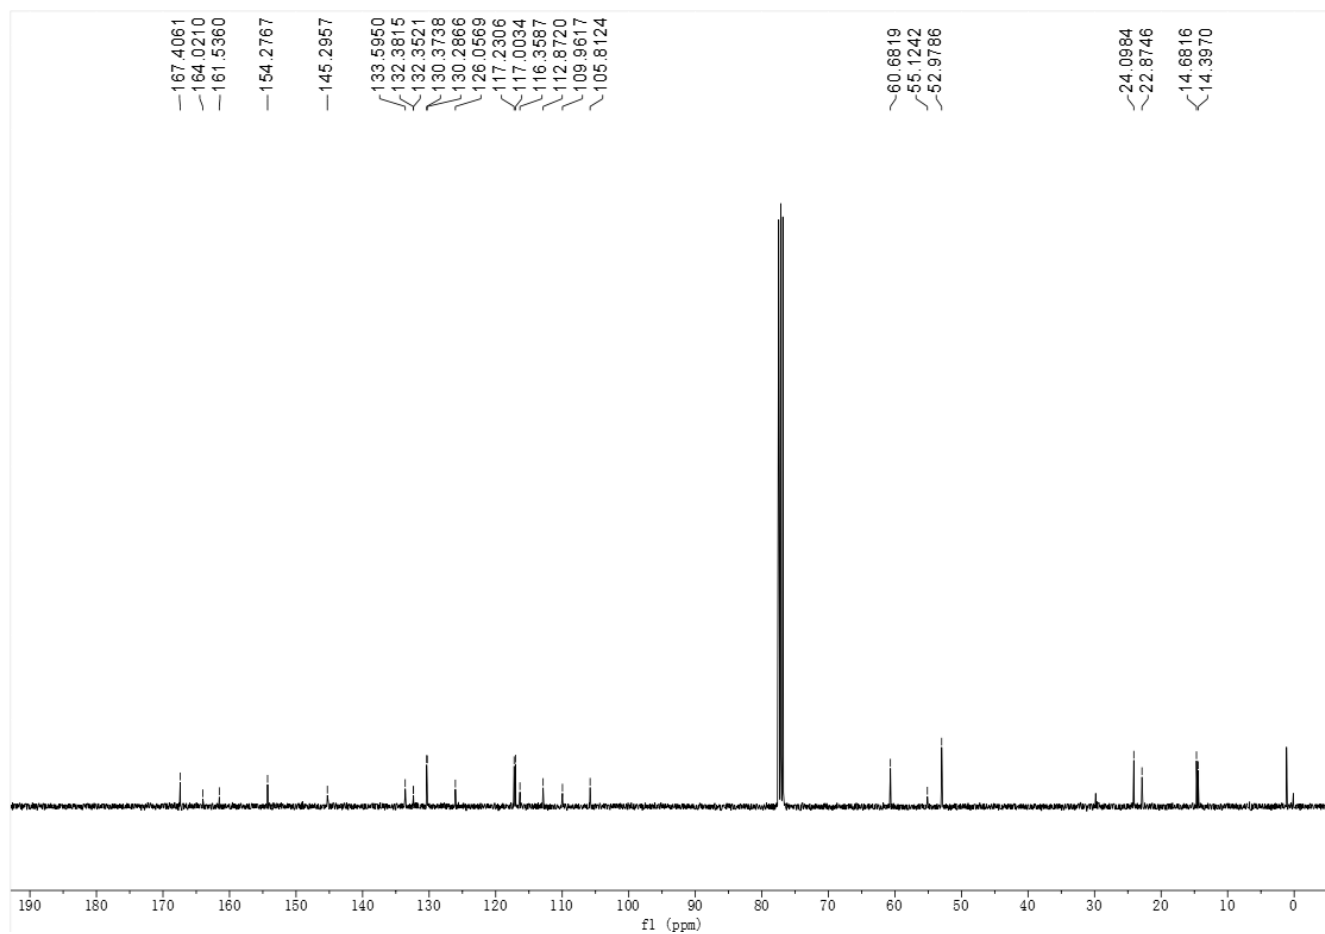

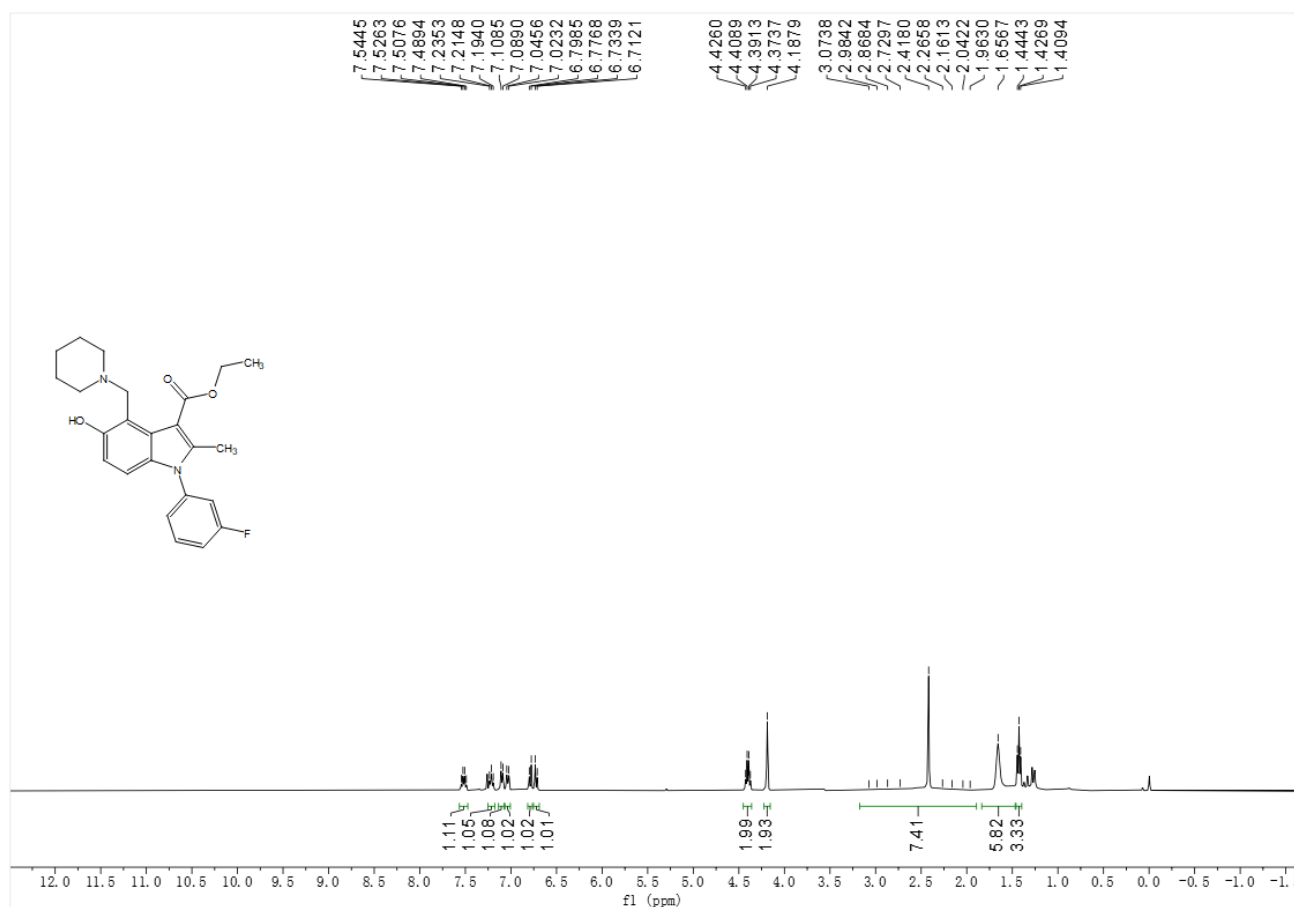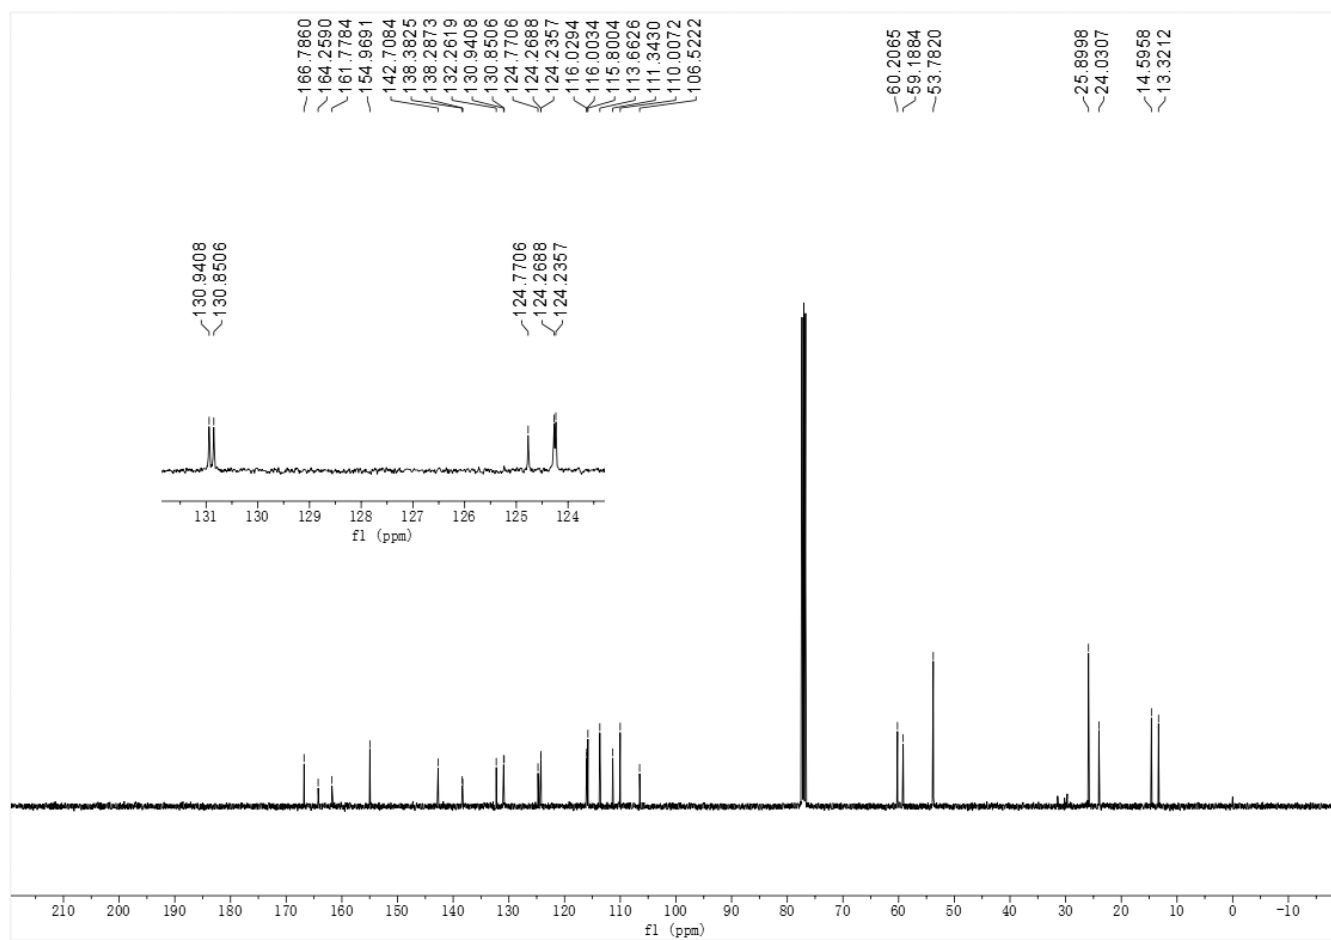



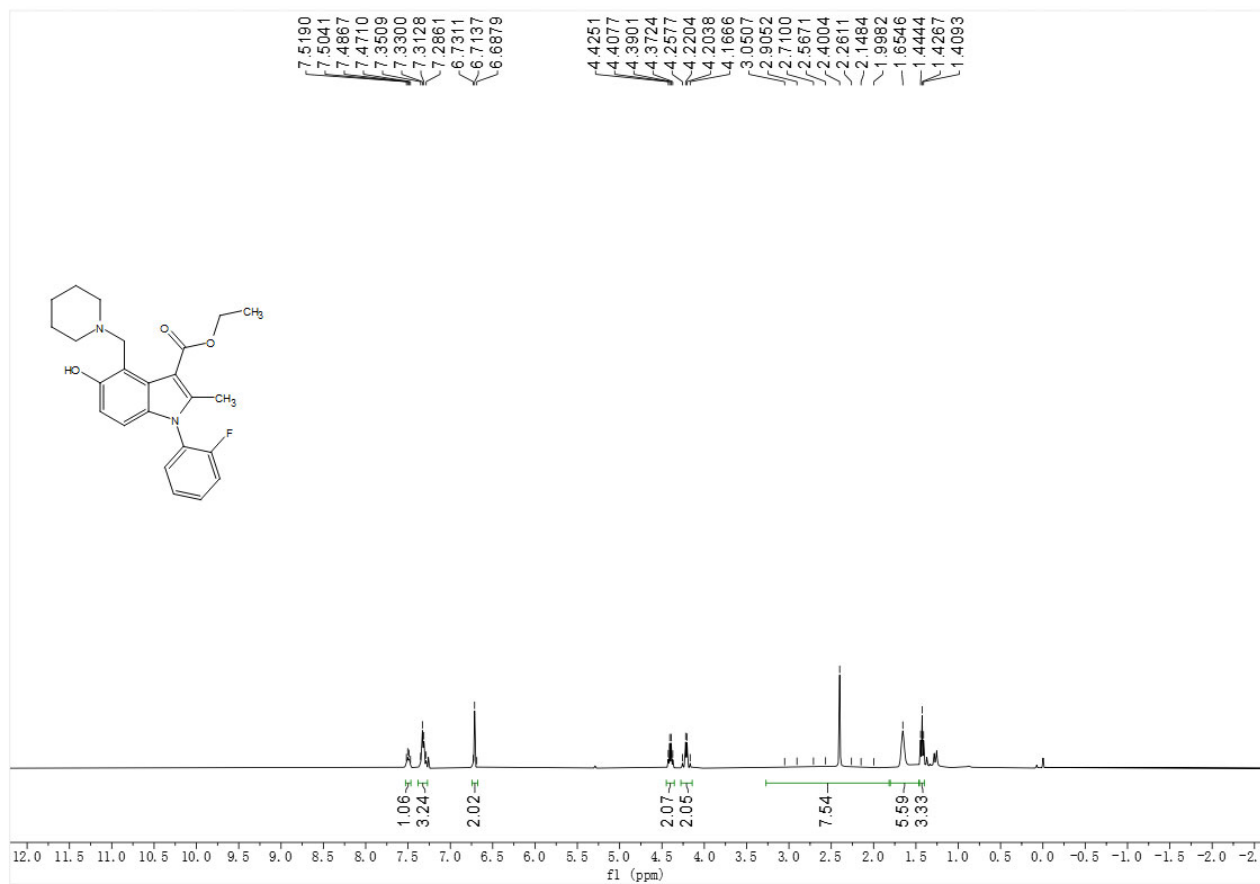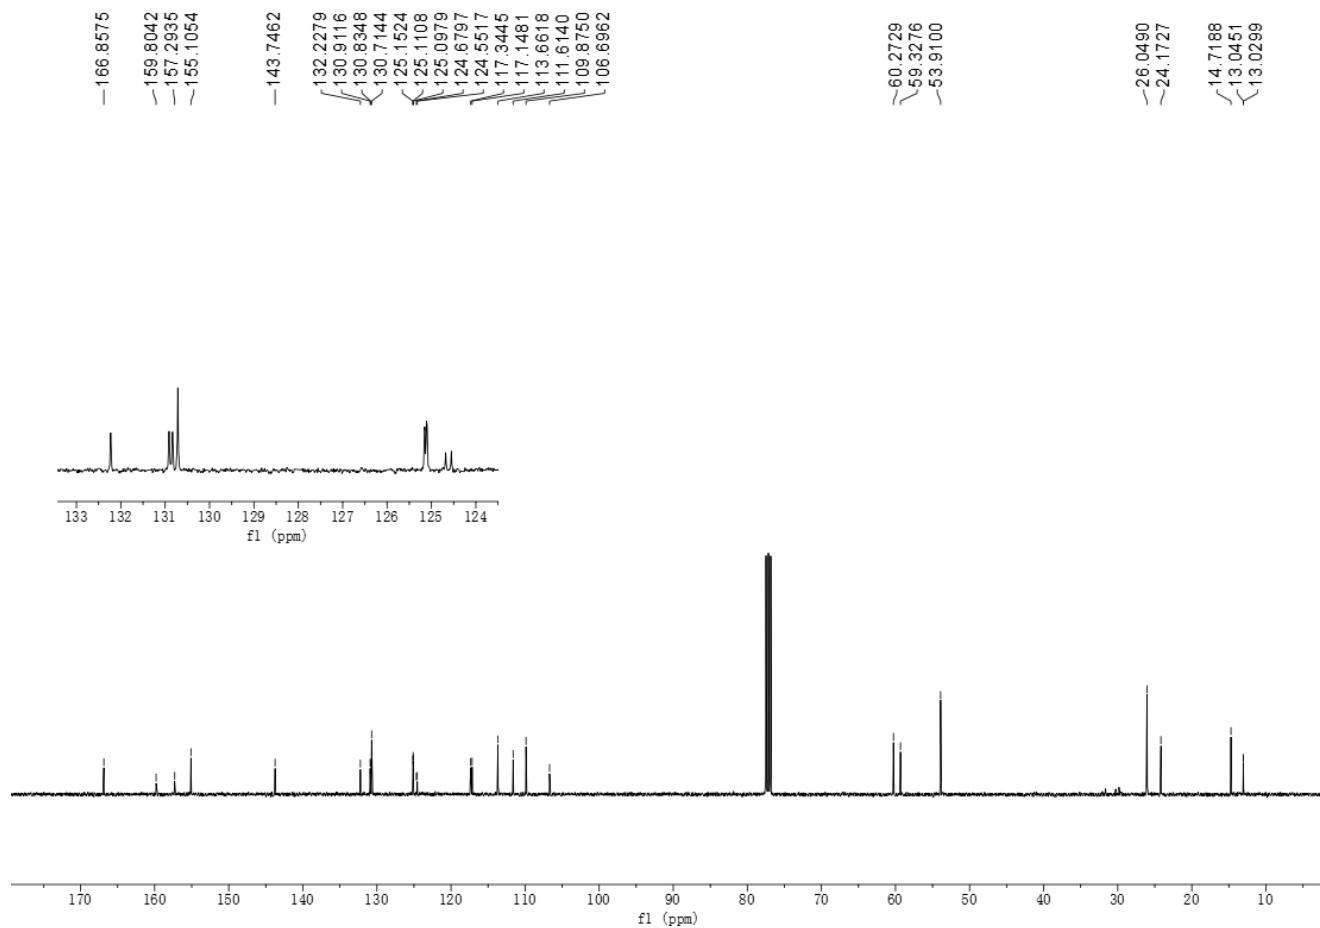

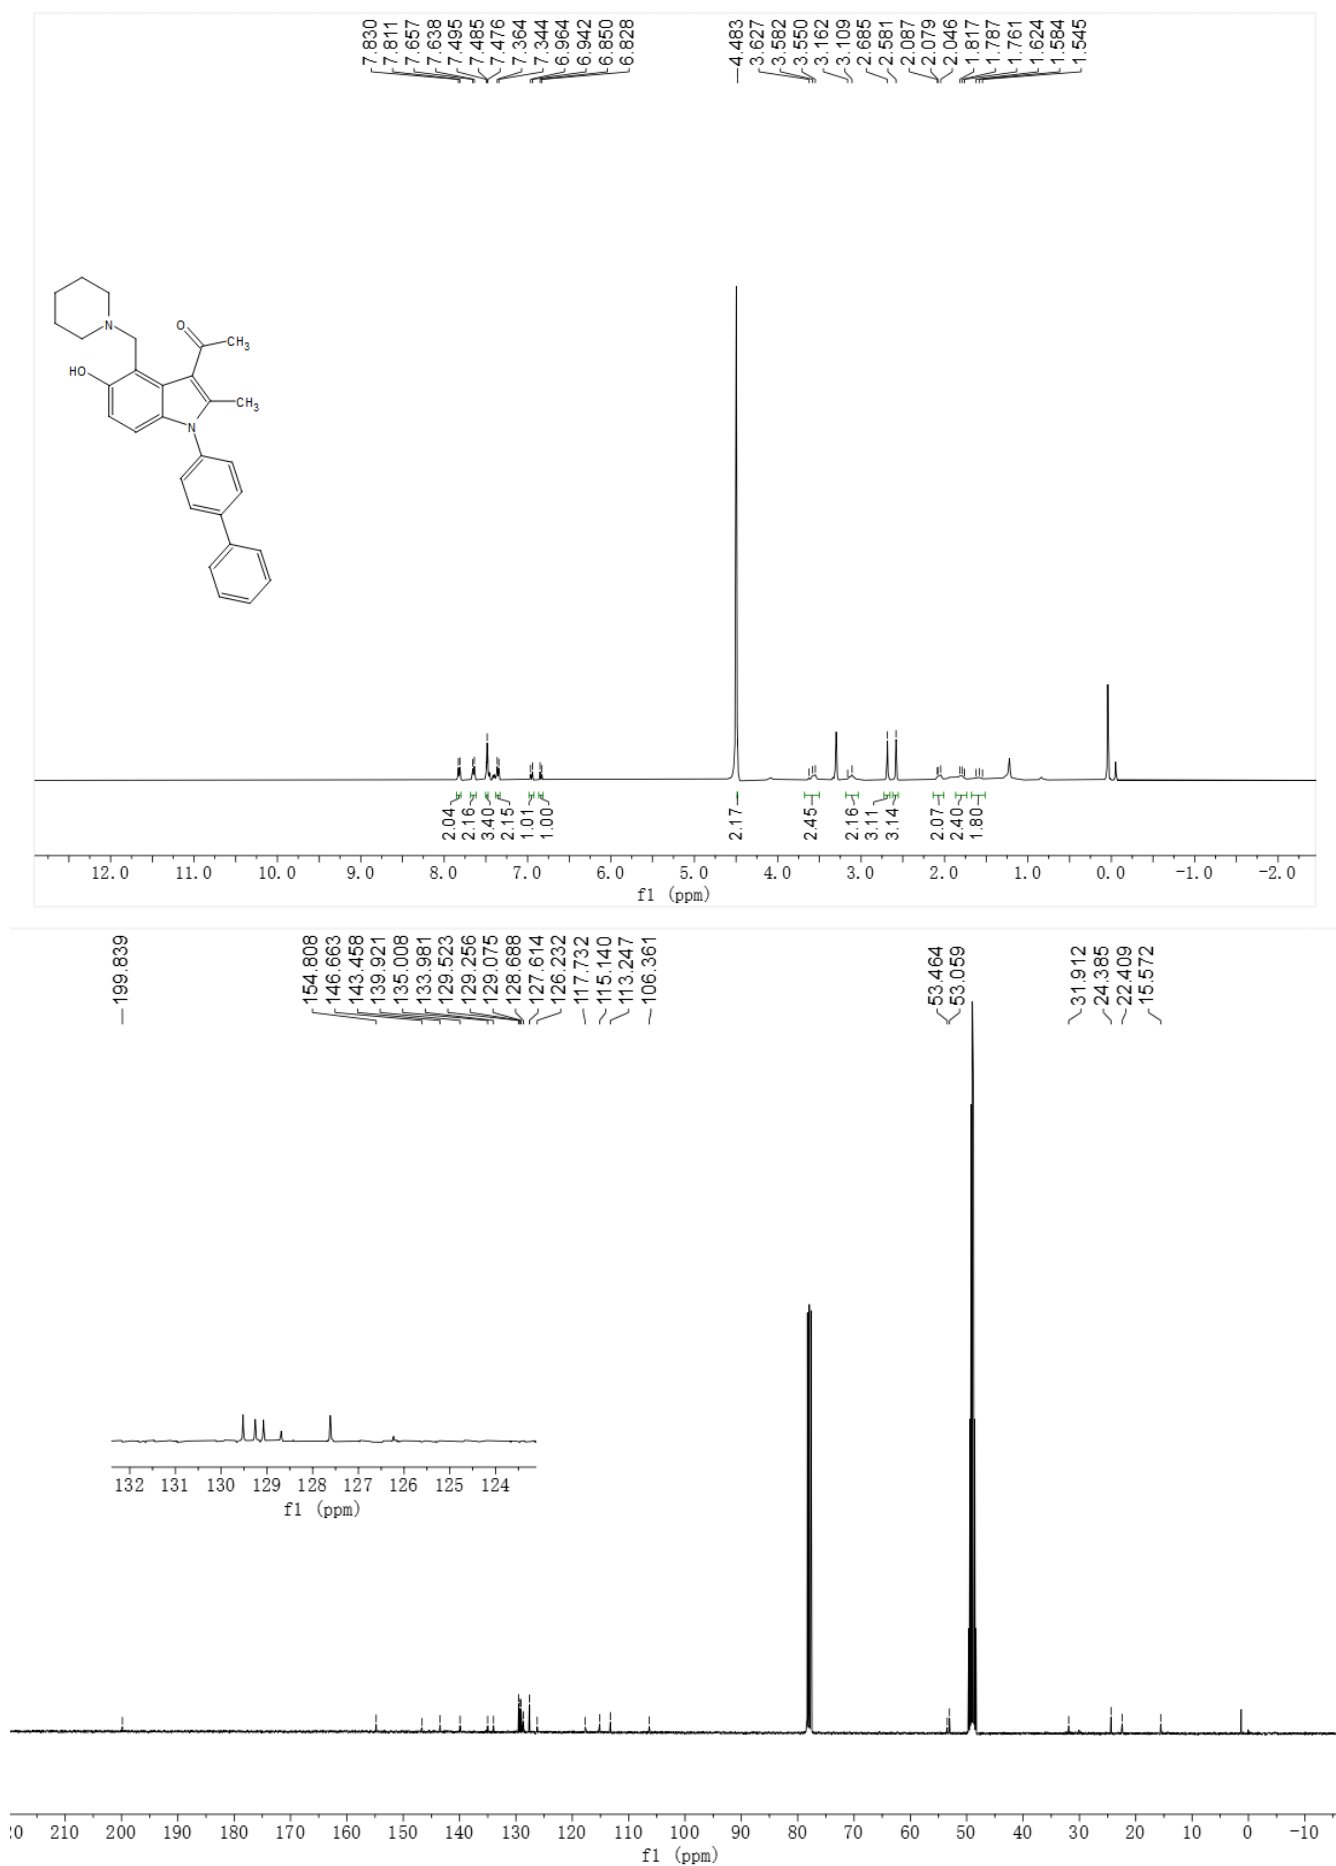

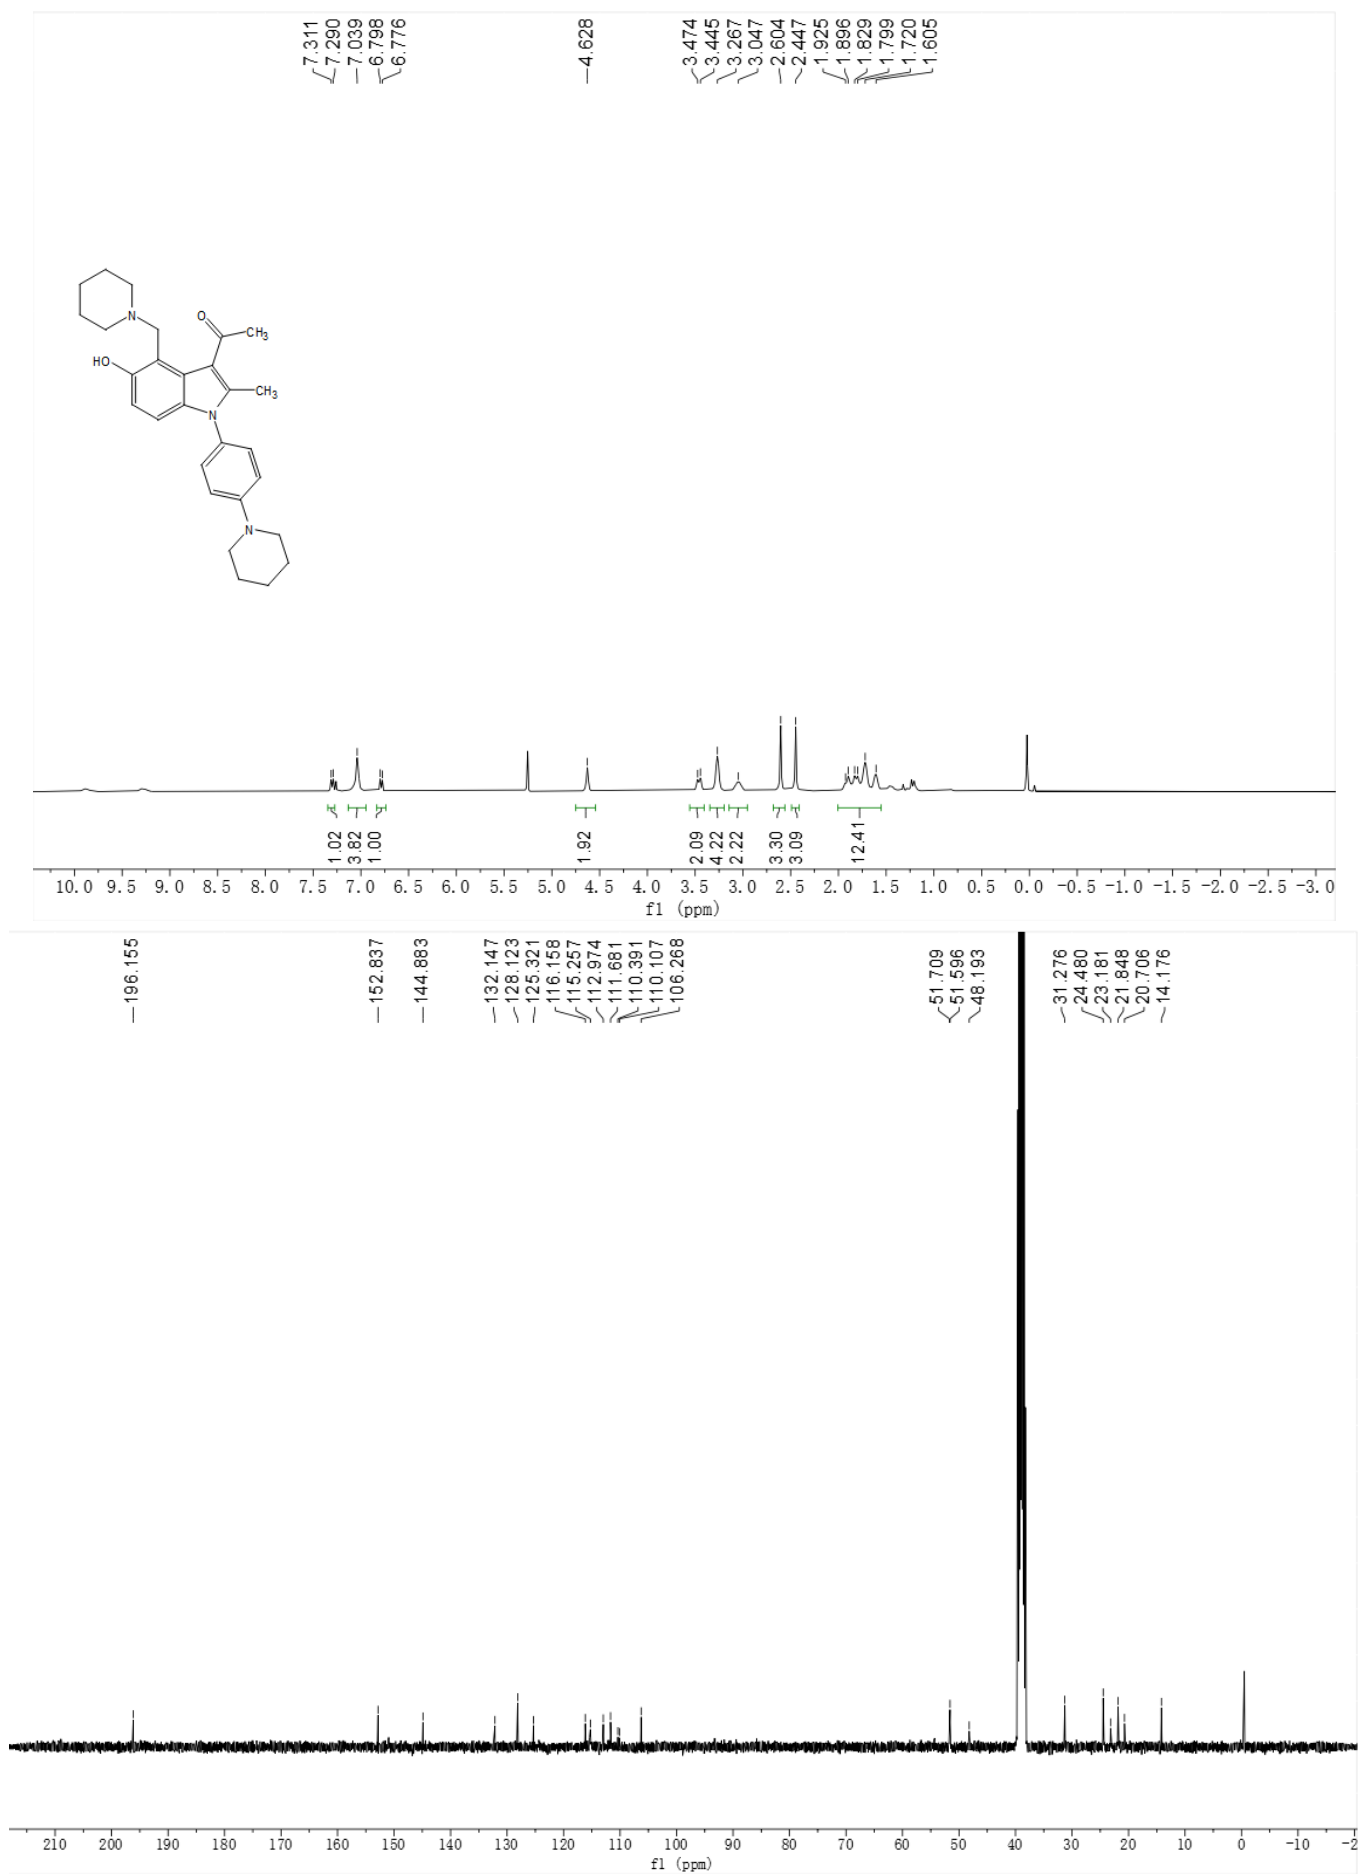

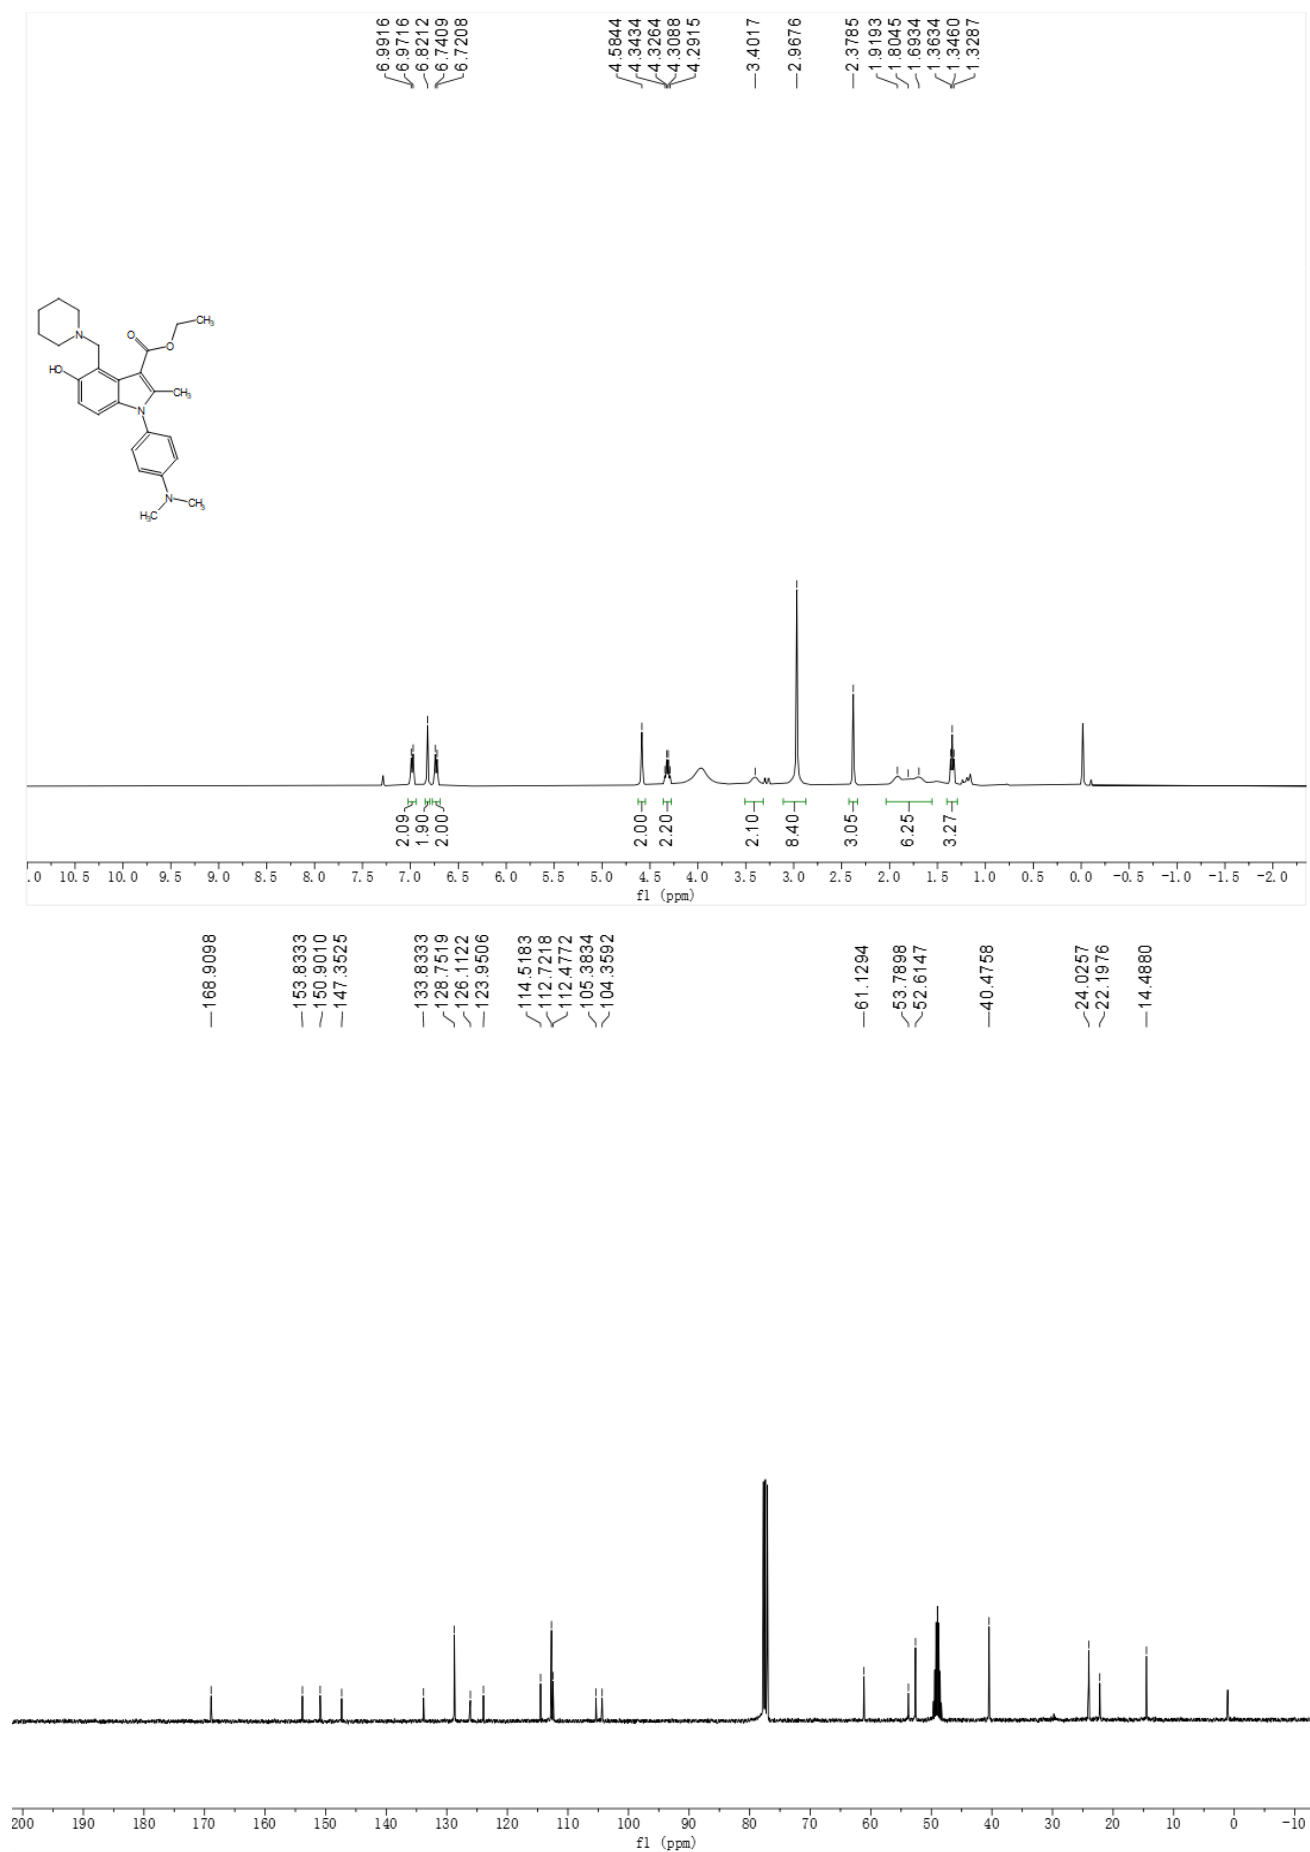

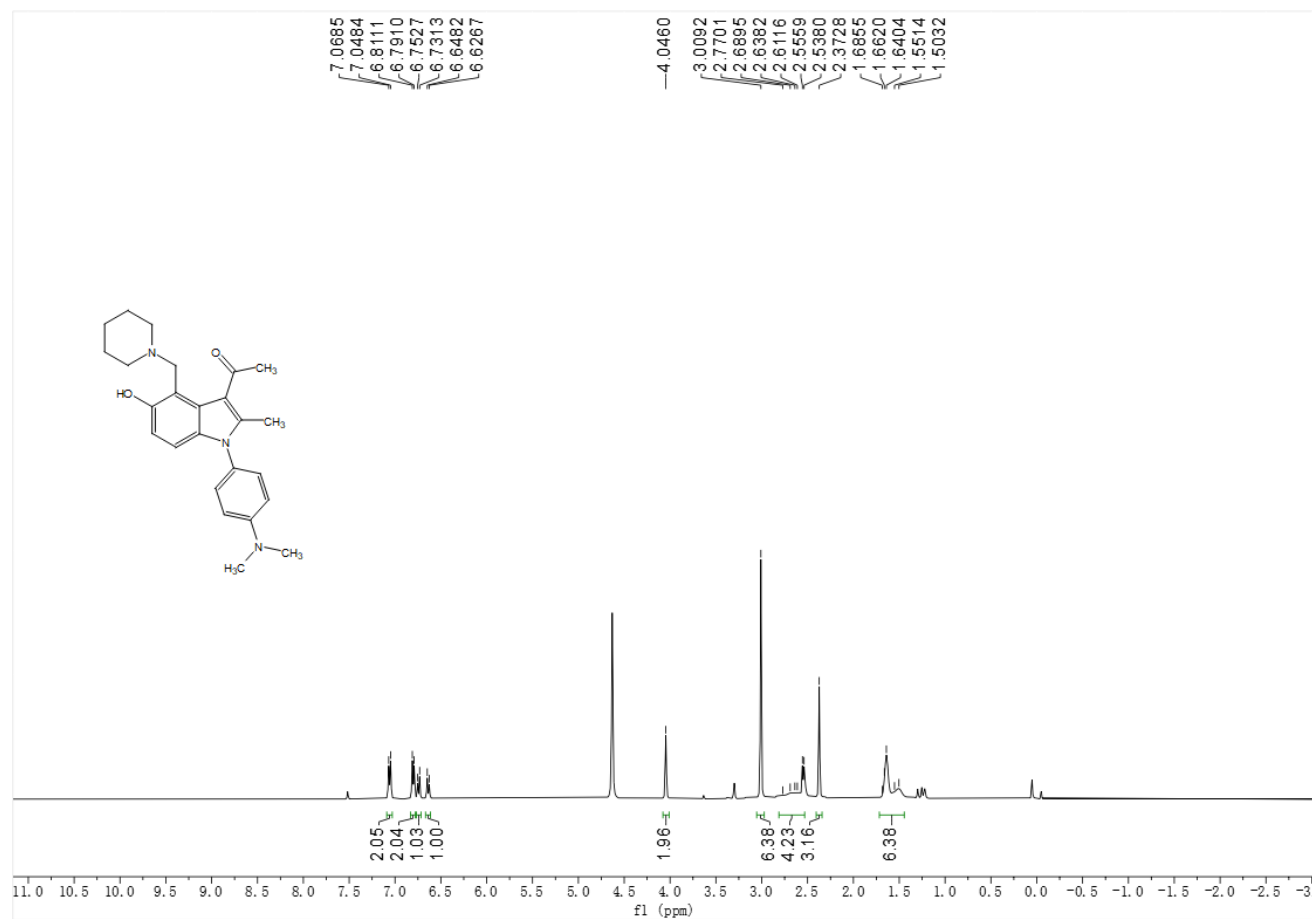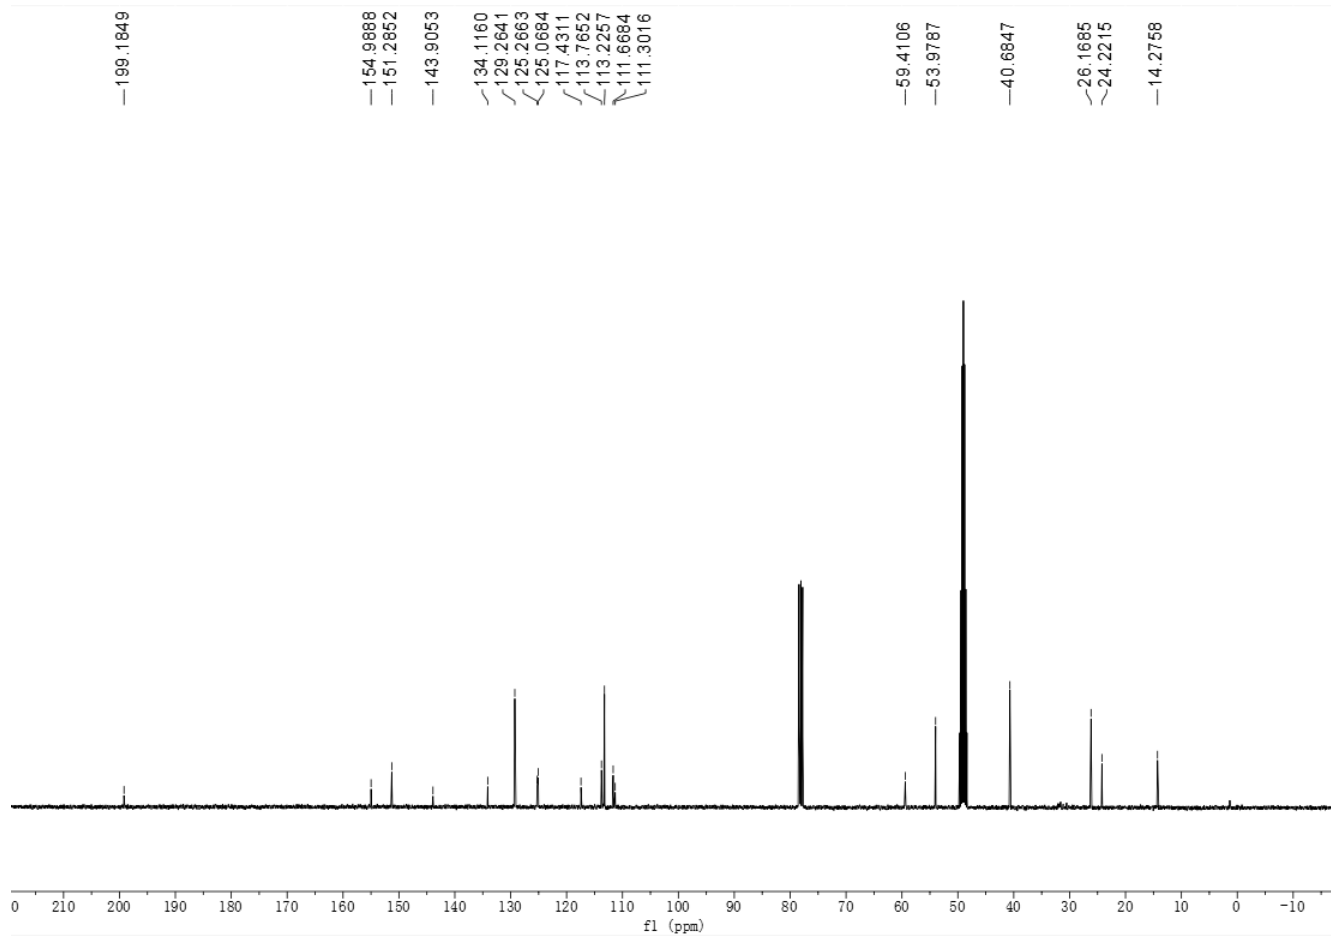

51

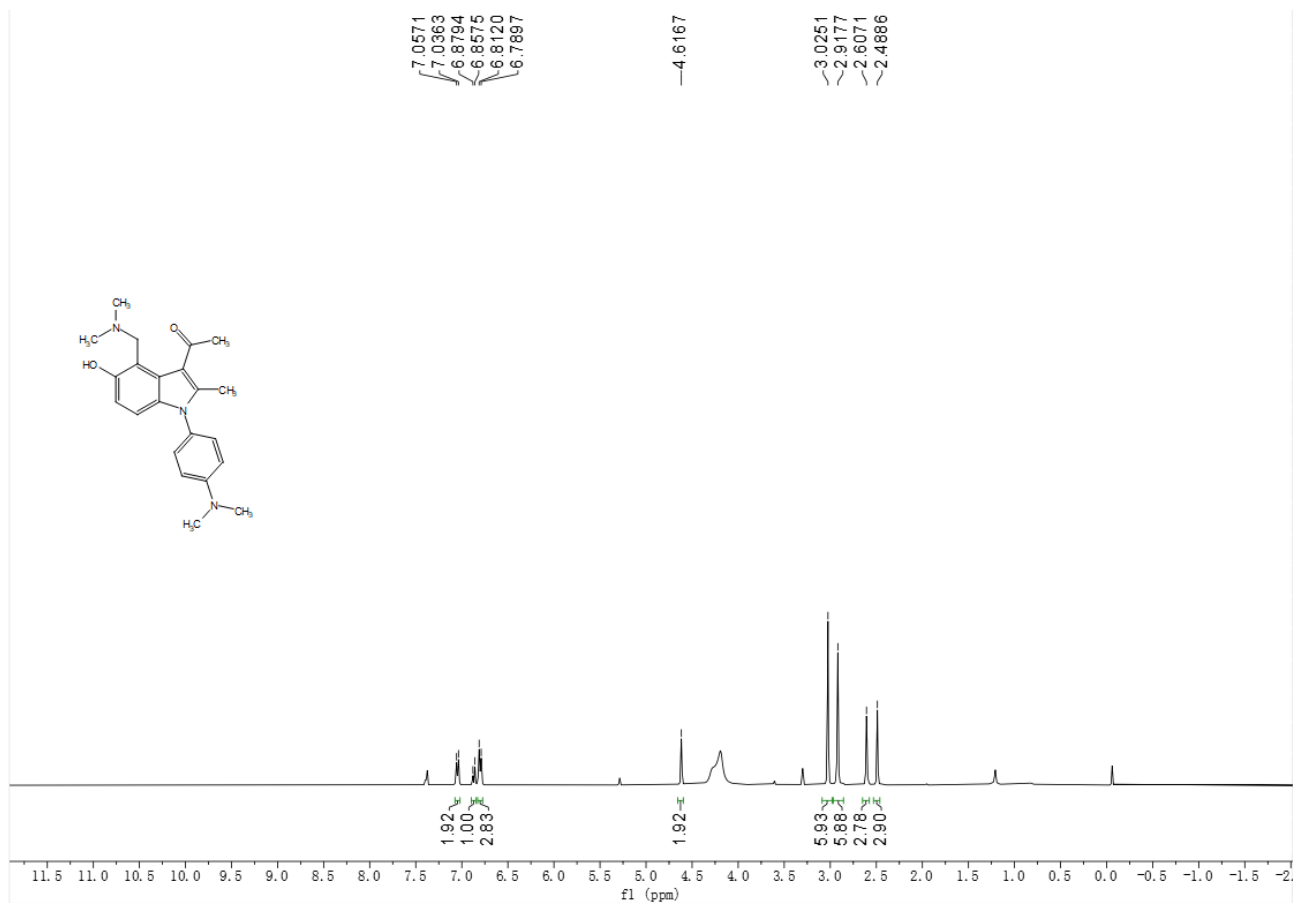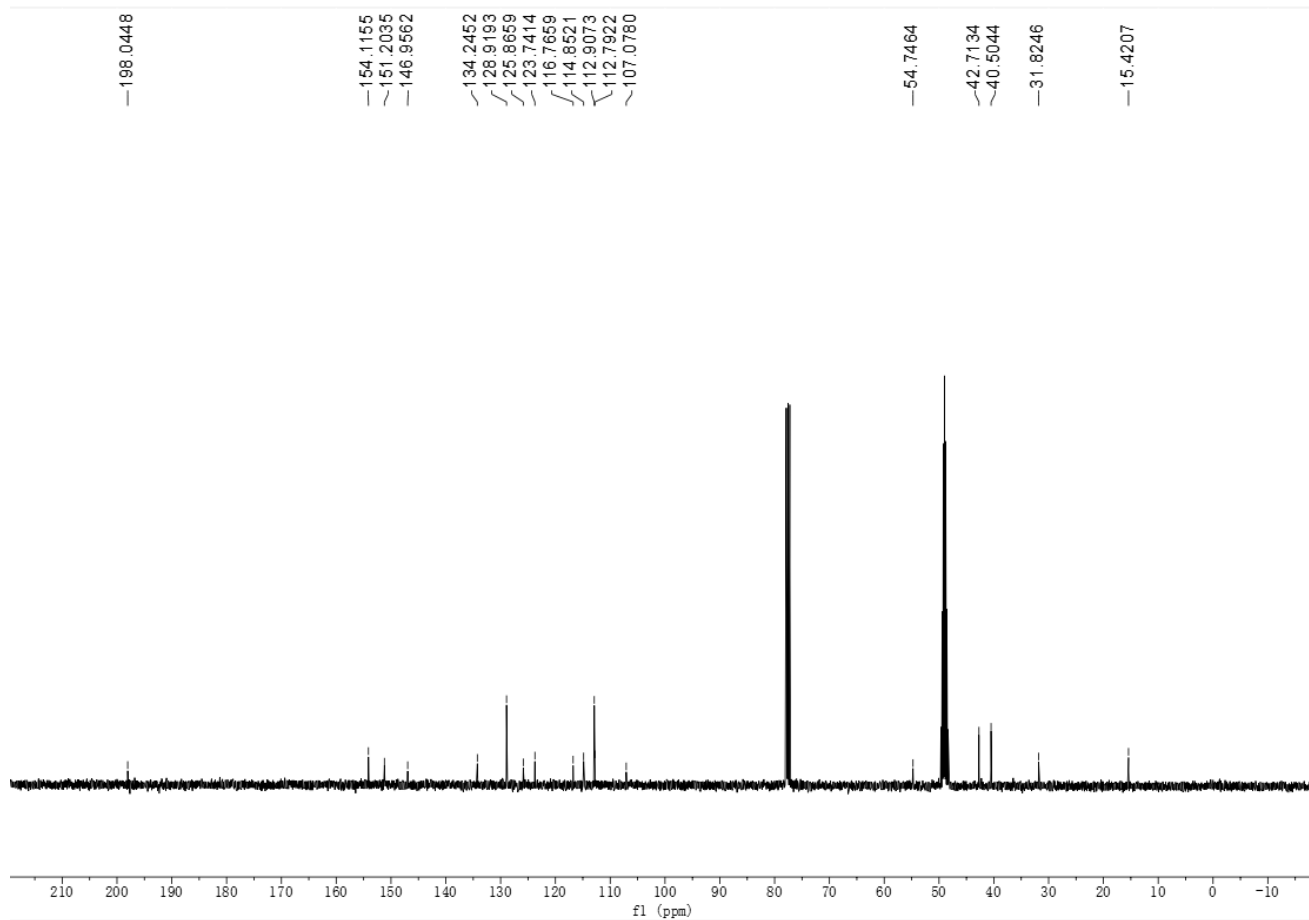

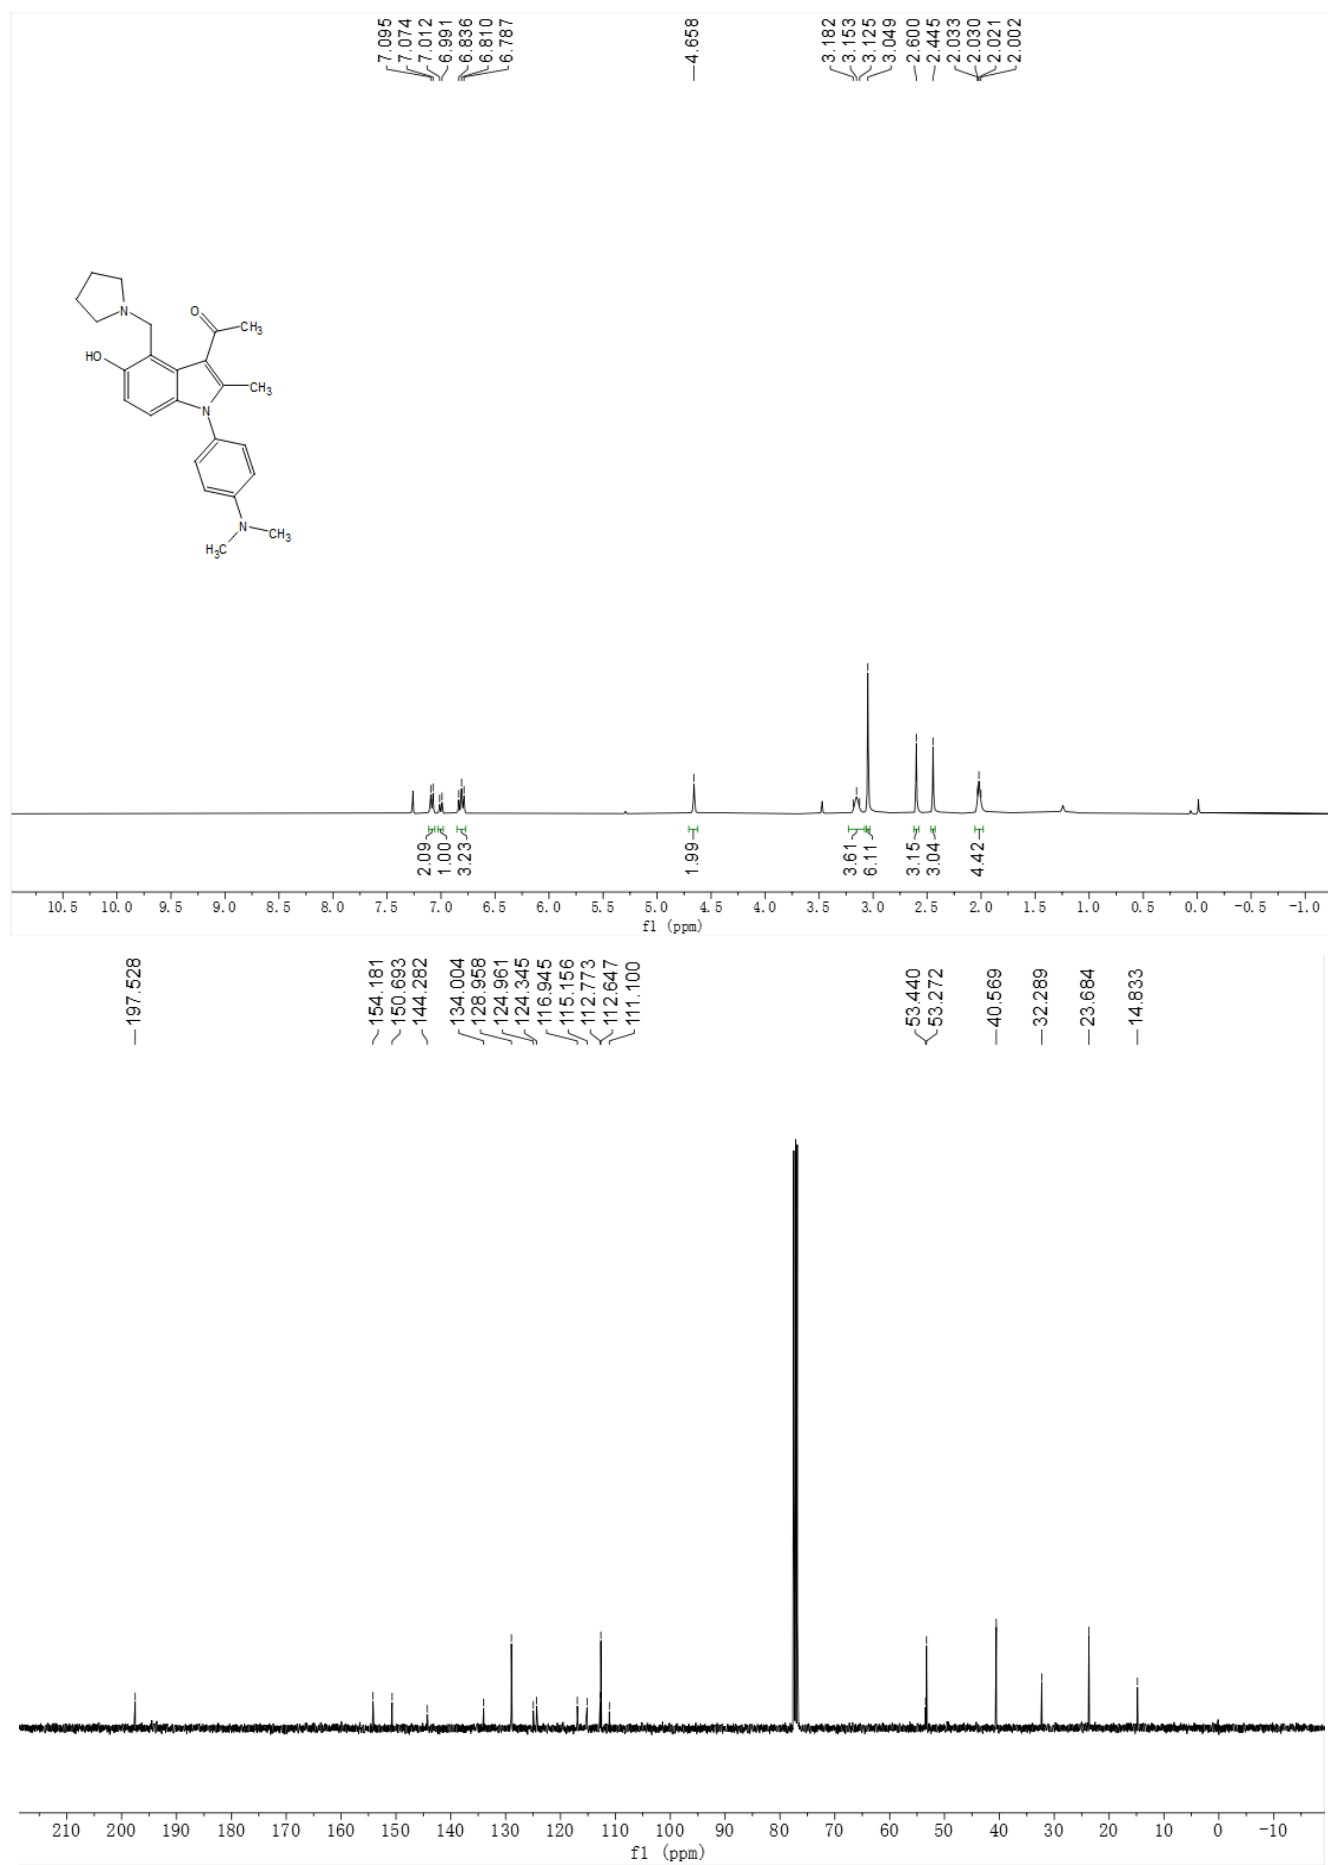

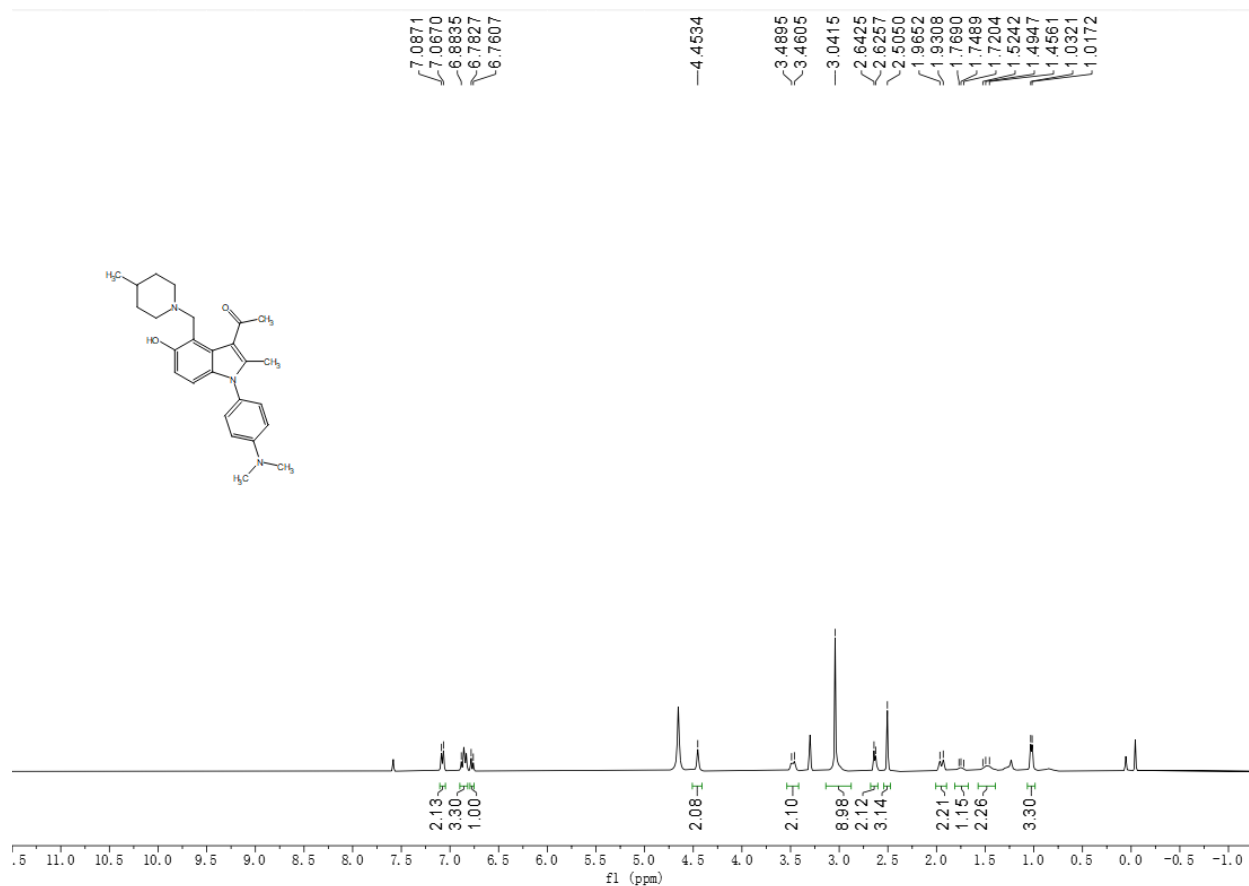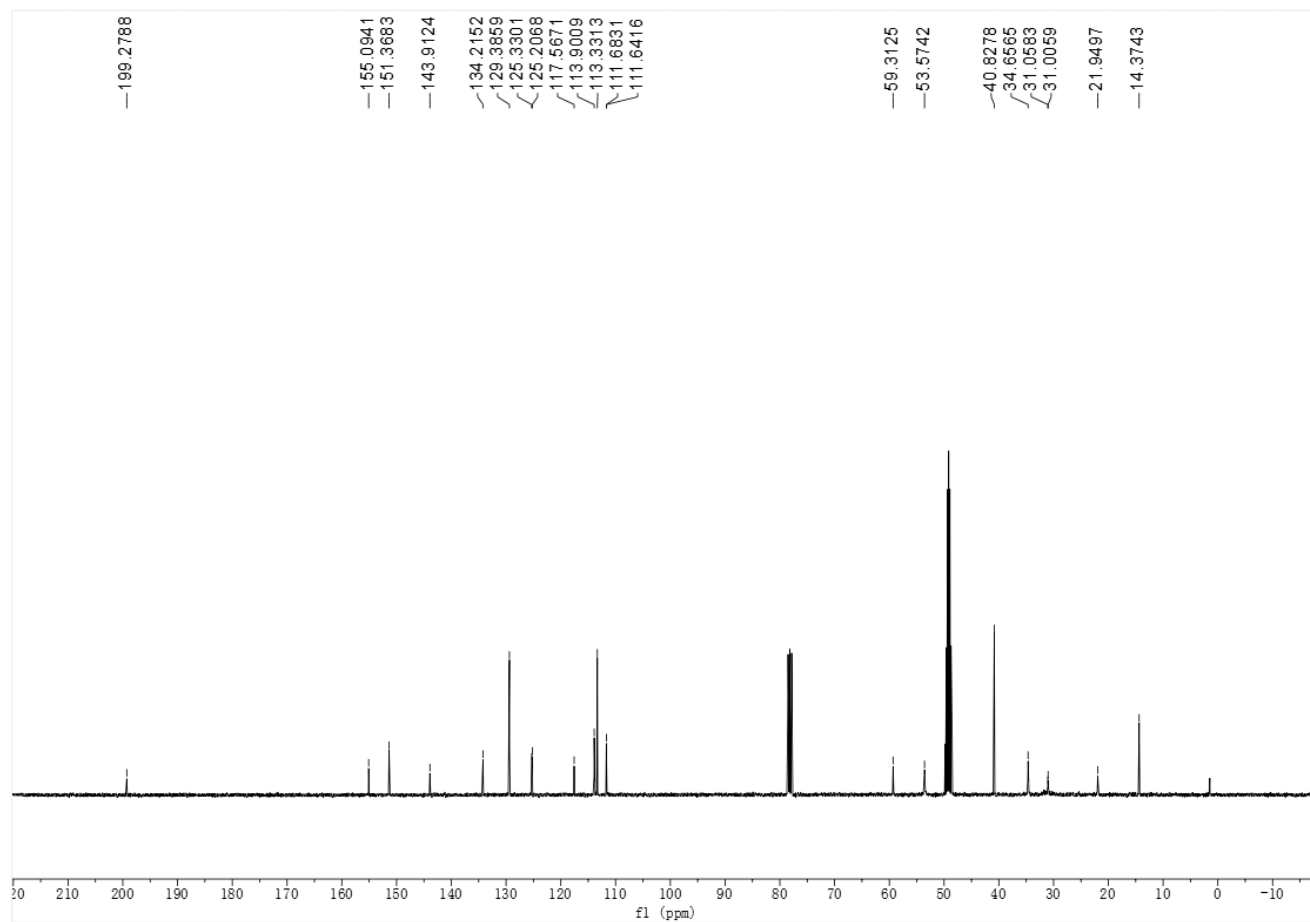



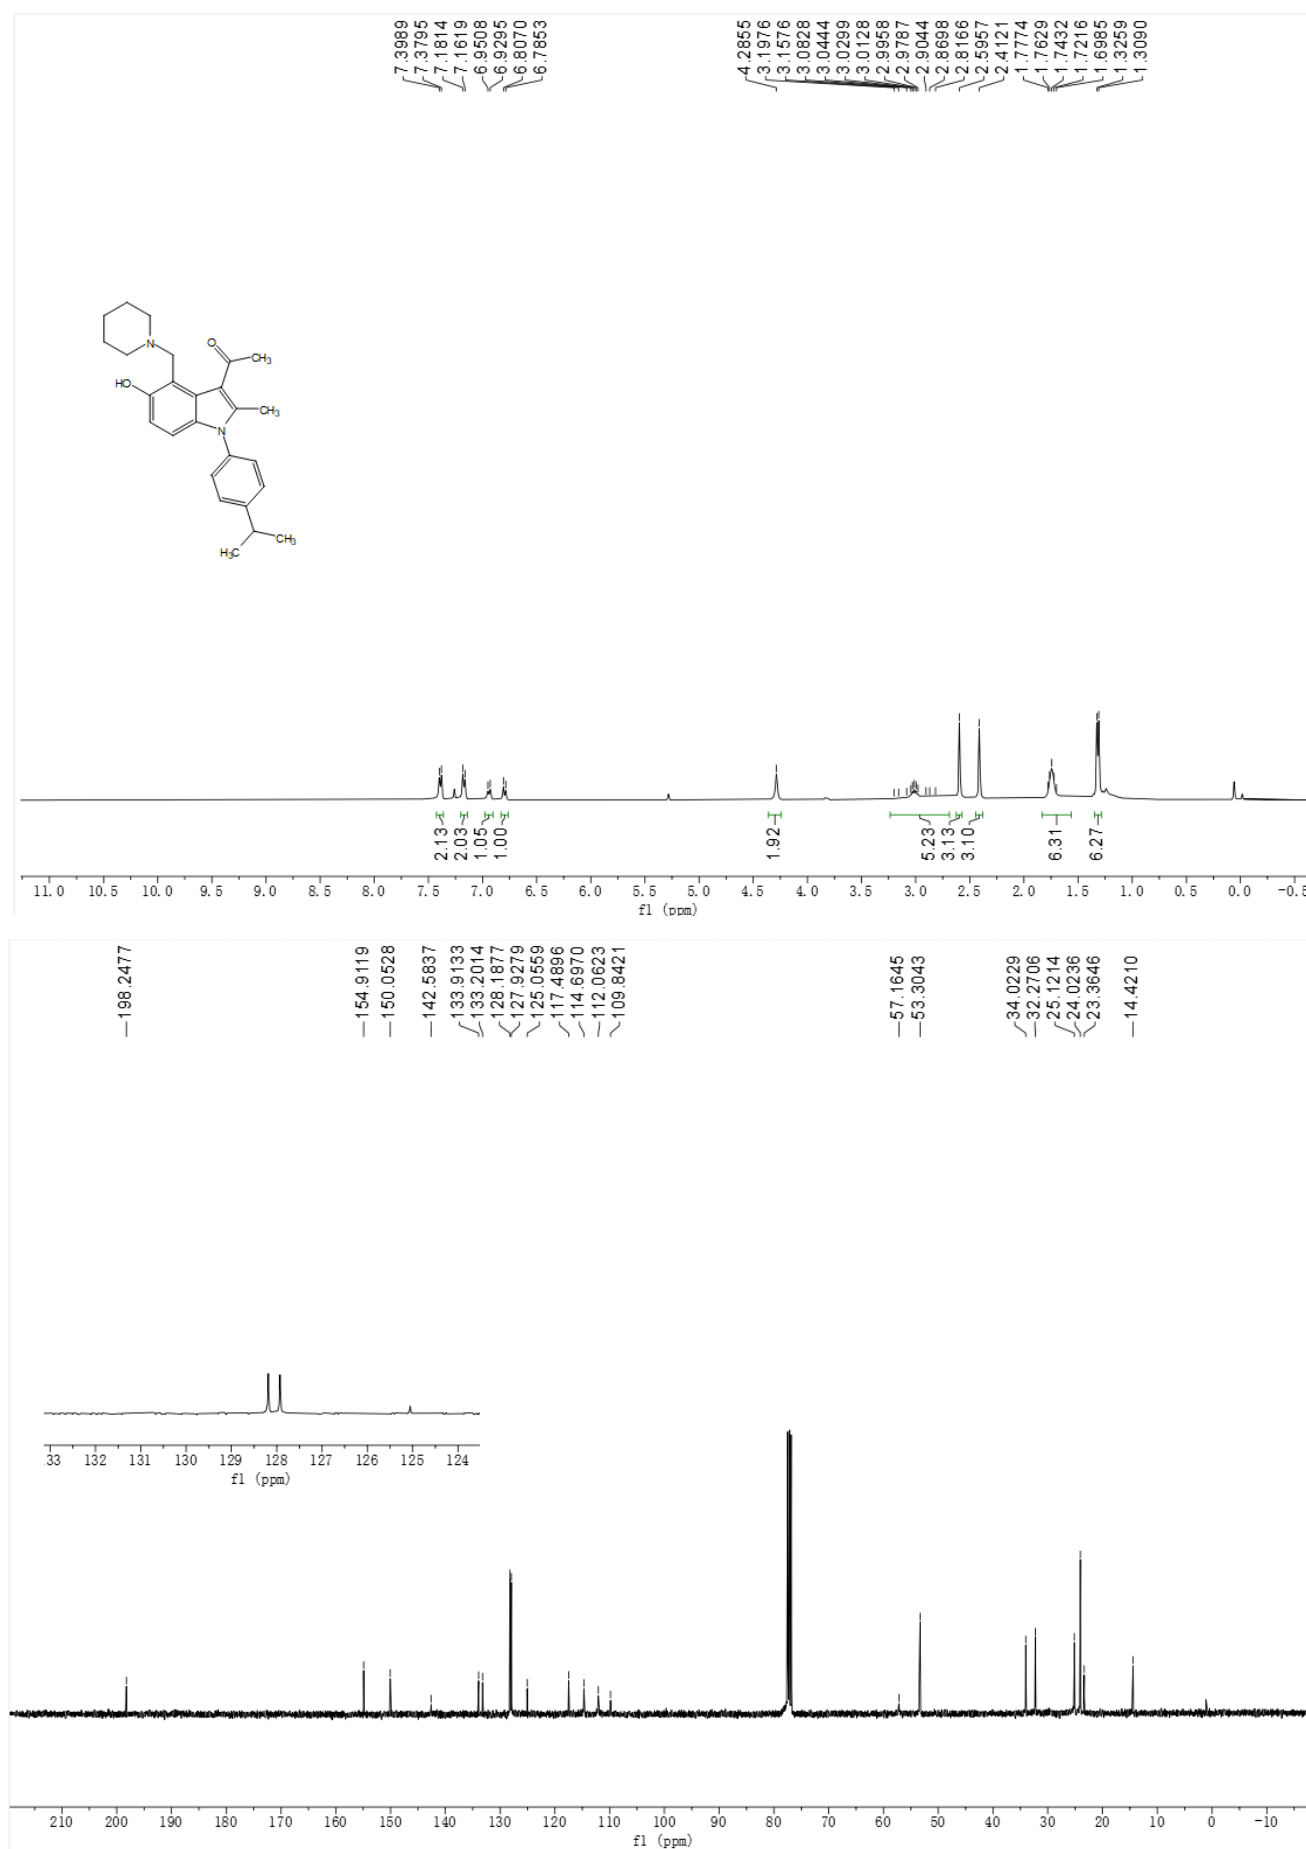

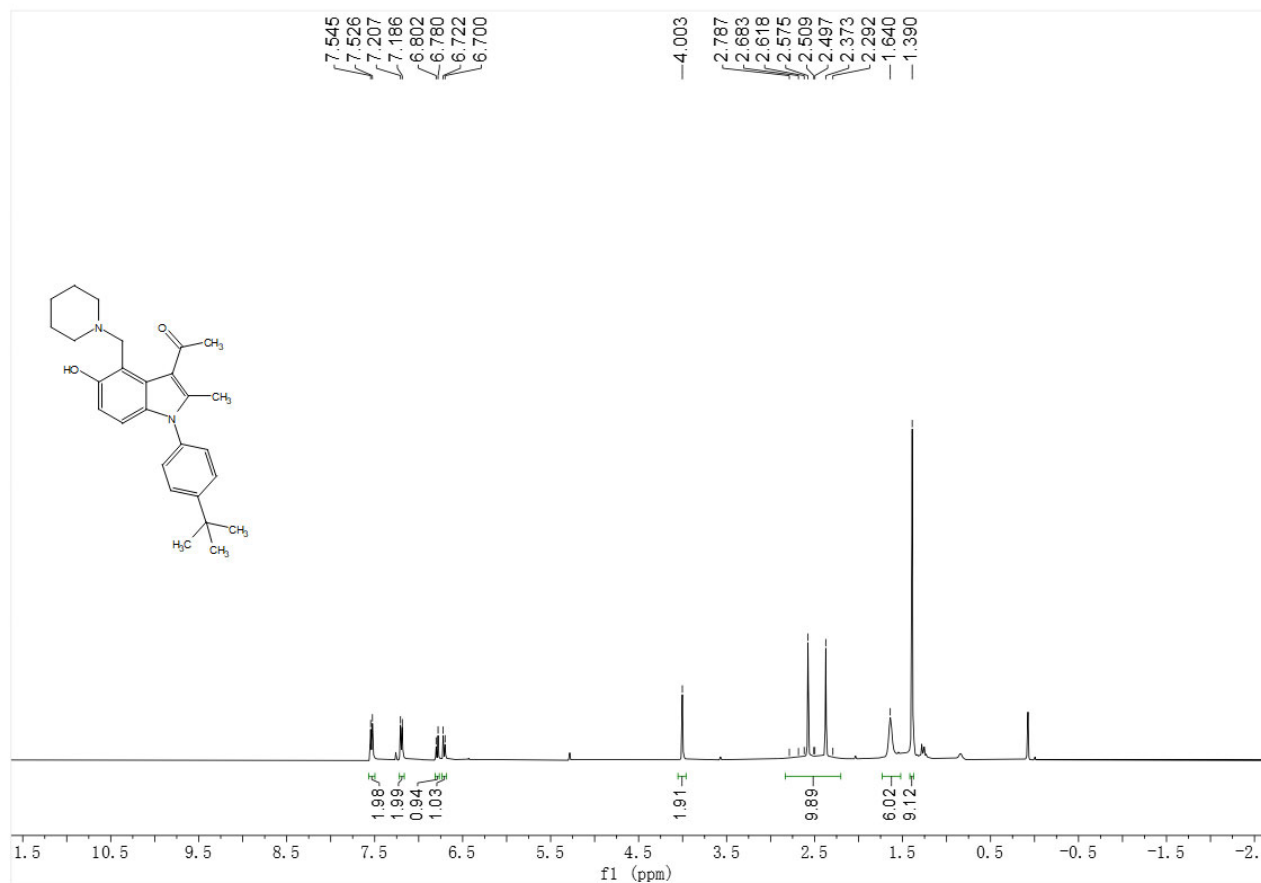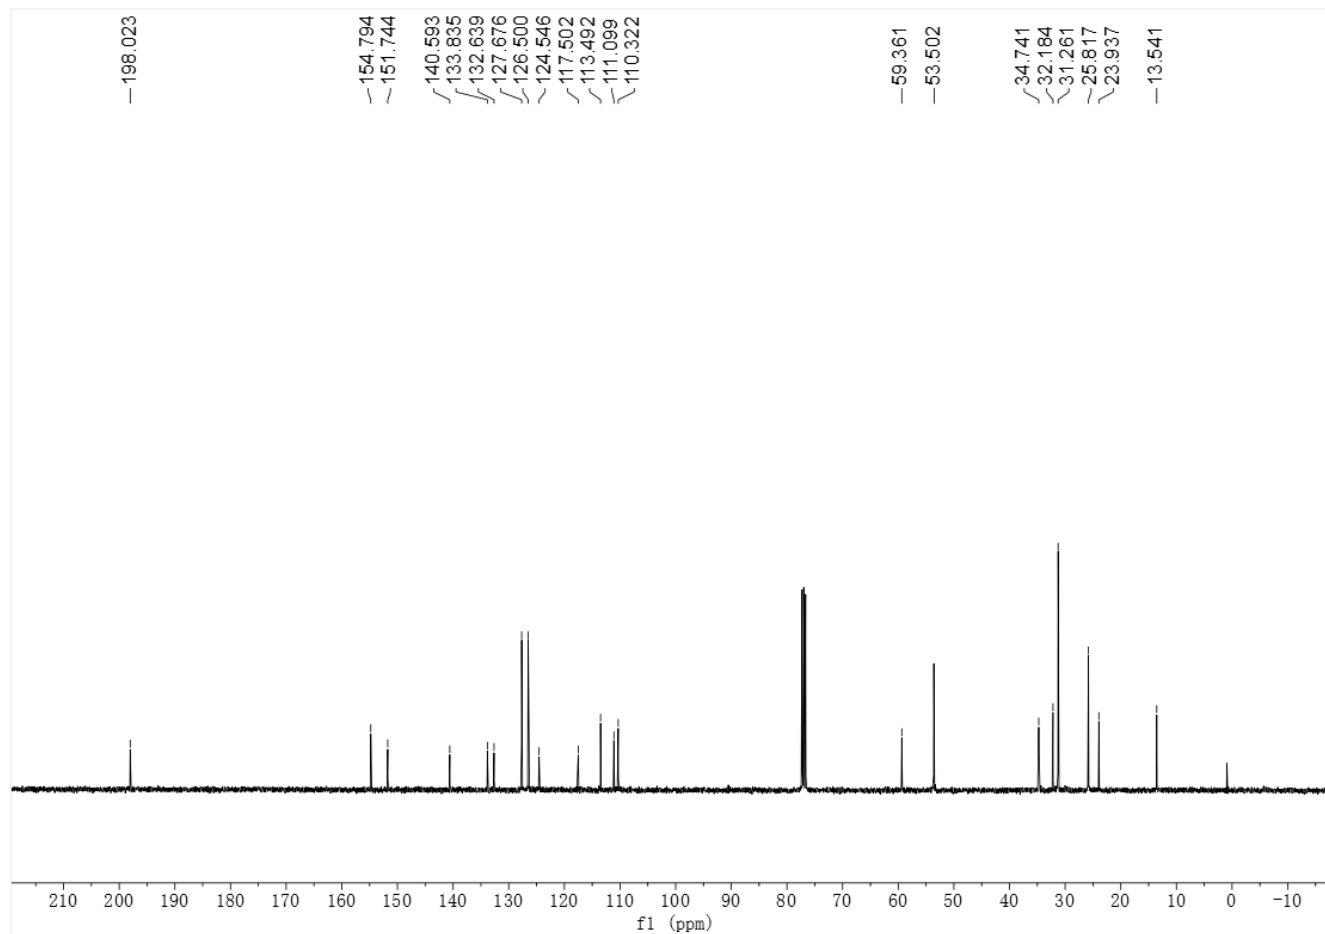

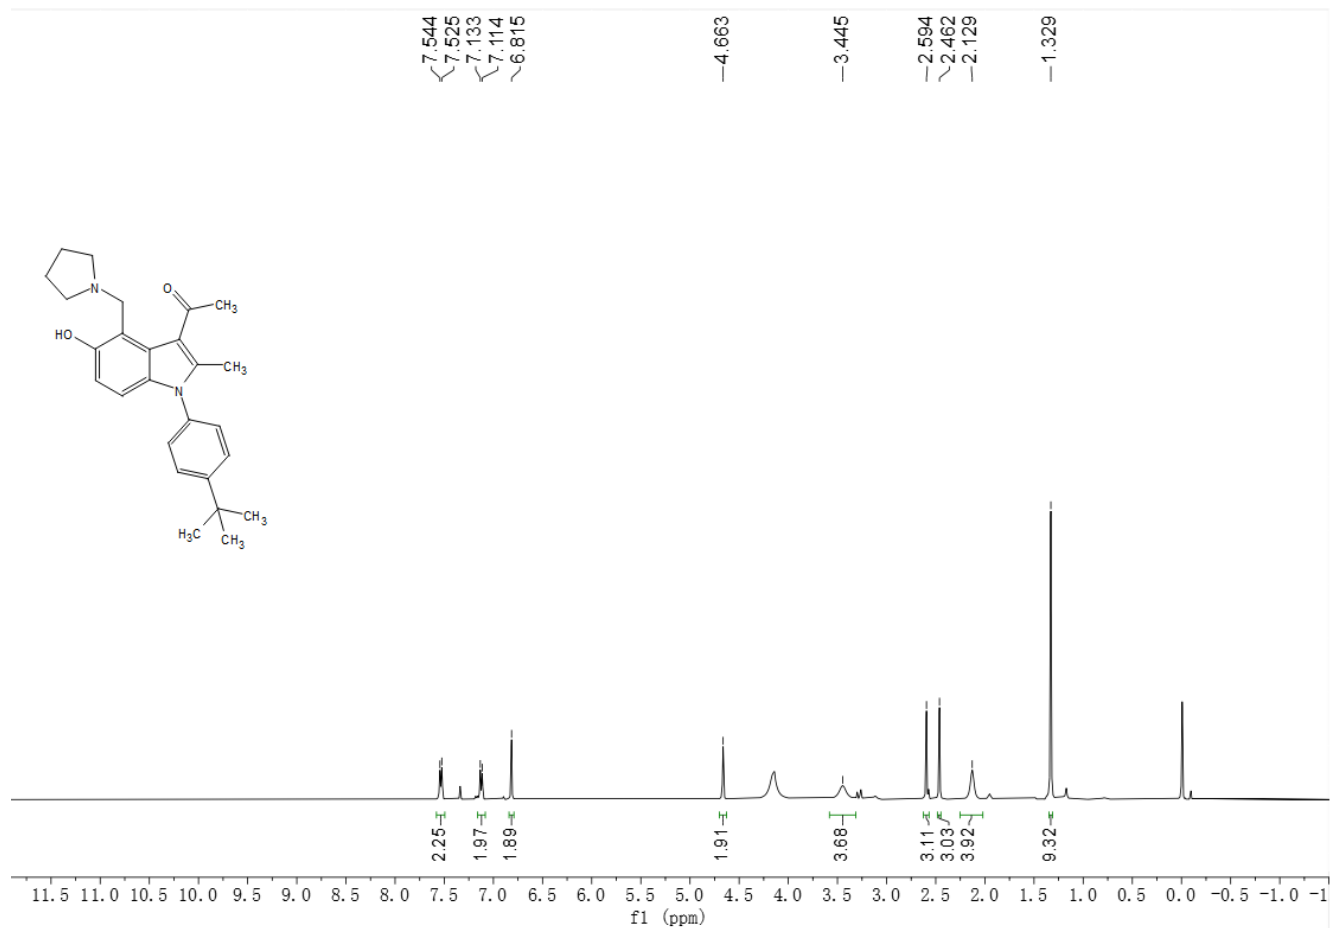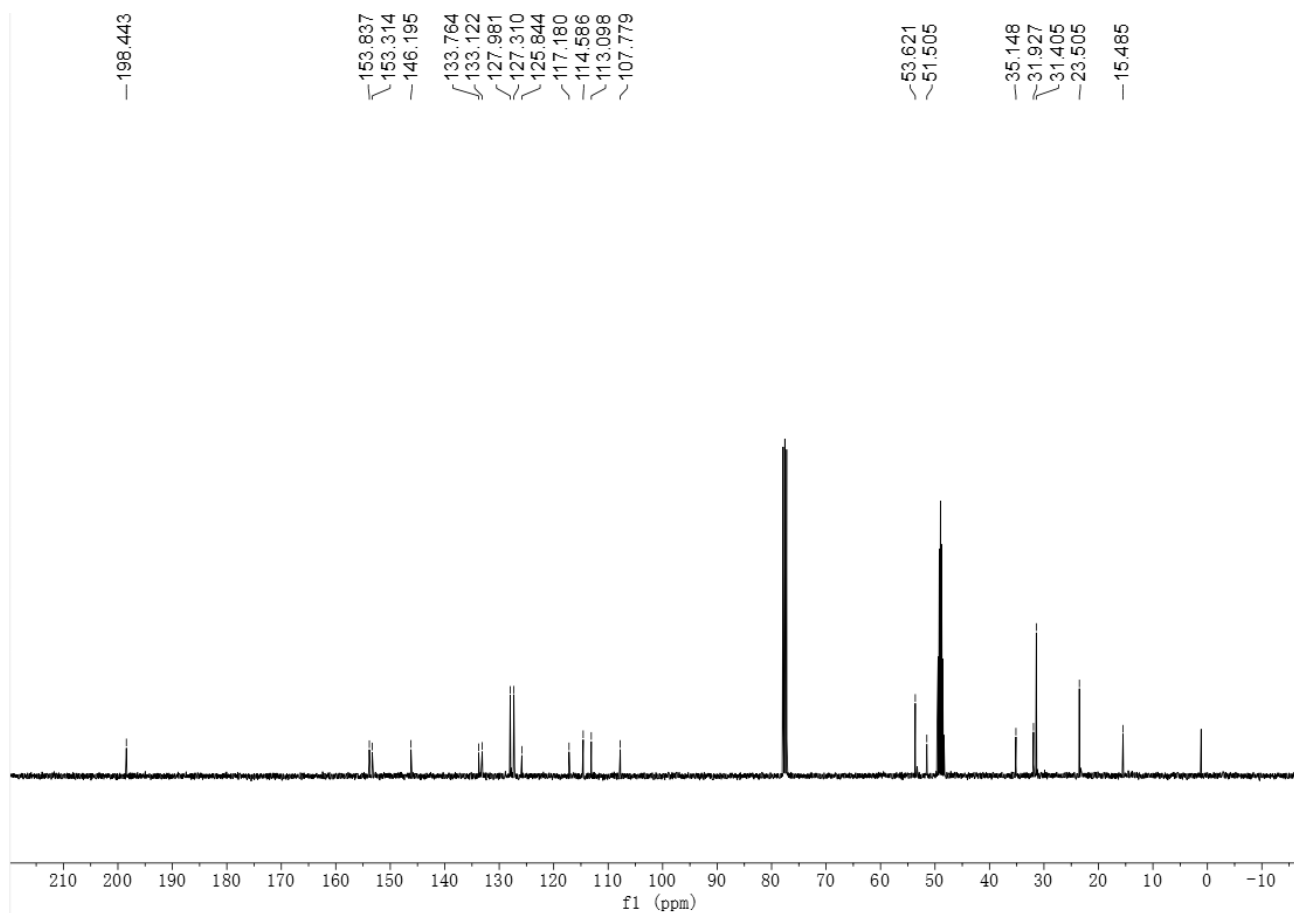

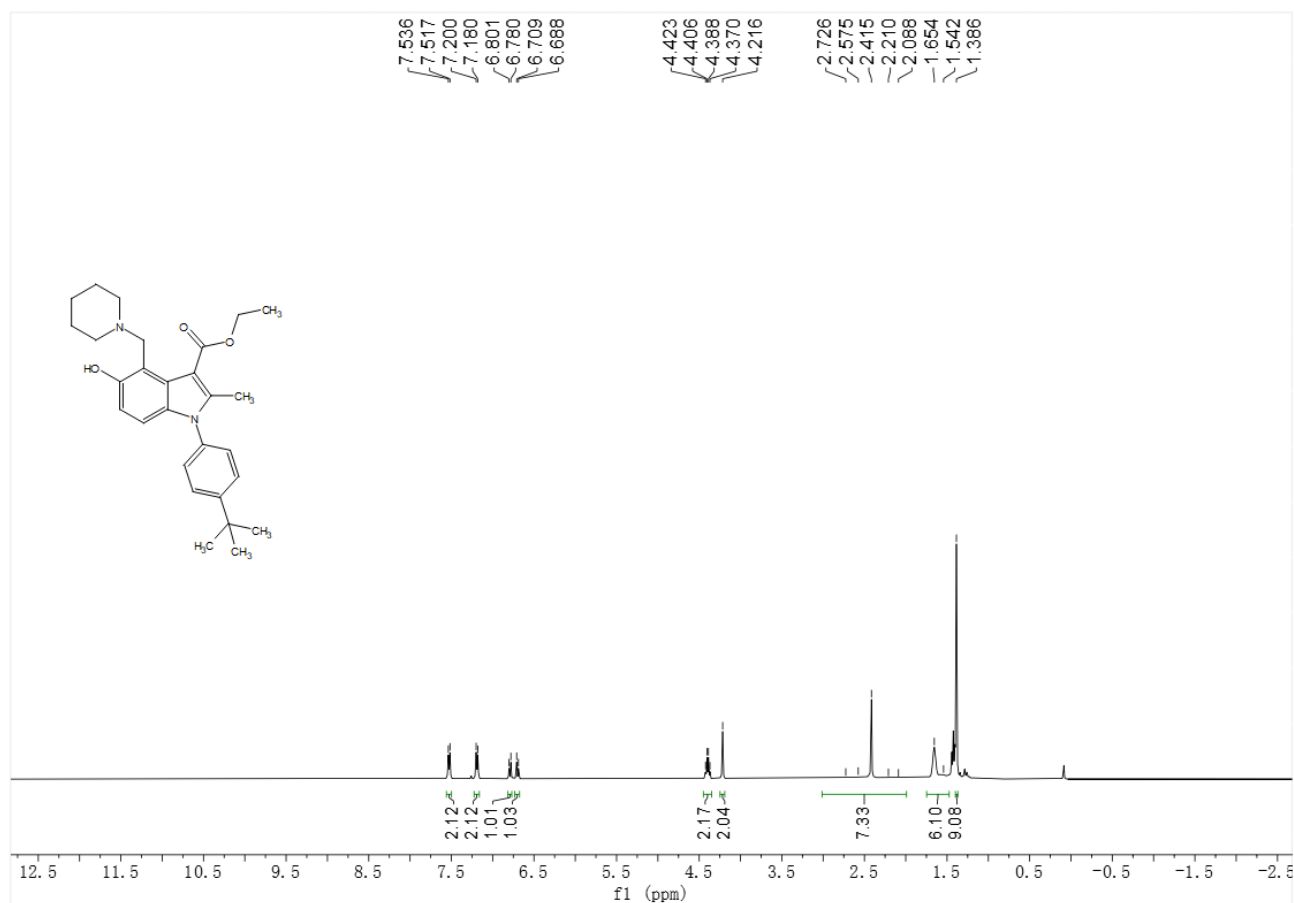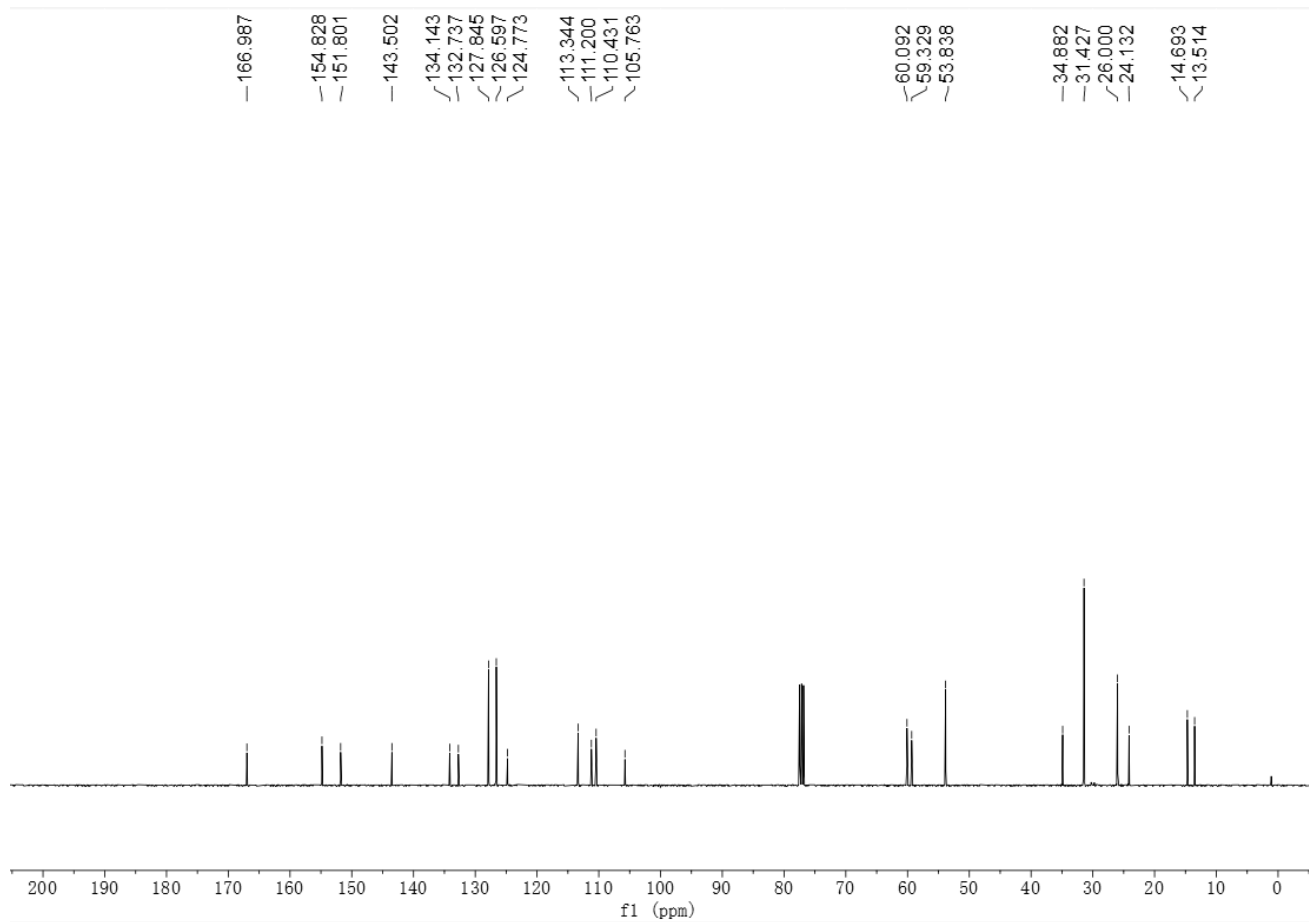

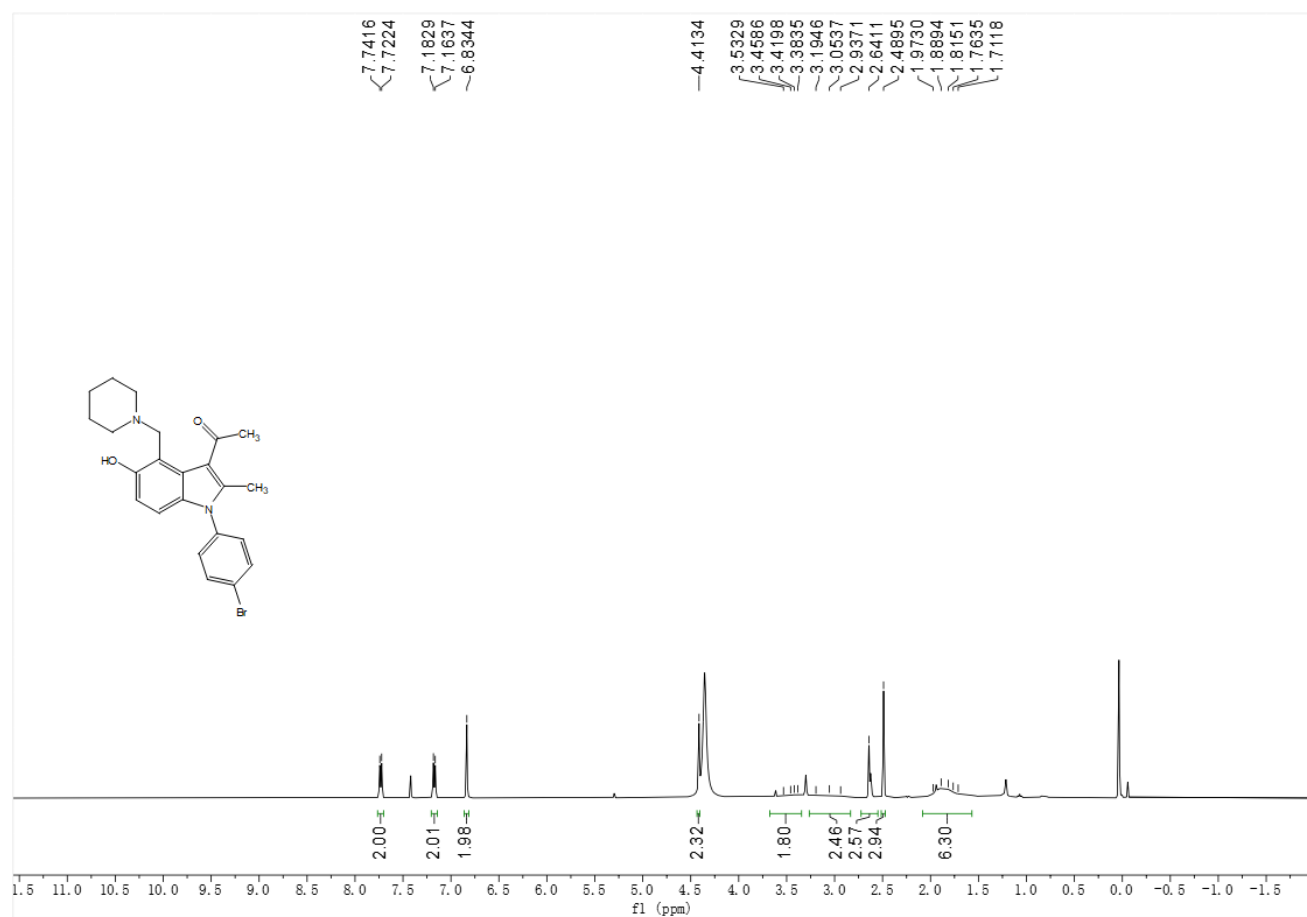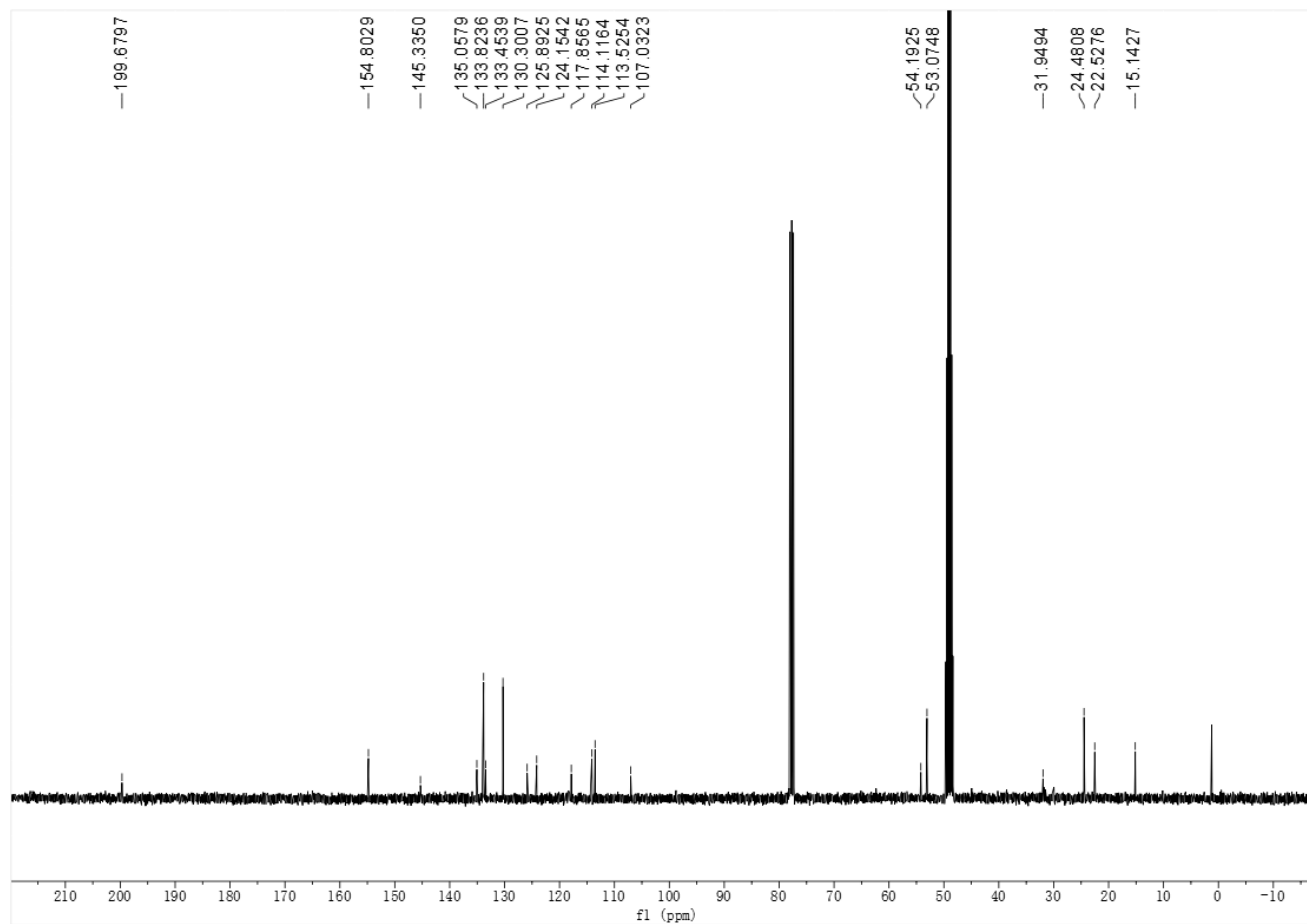

**Table S1.** Analytical HPLC purities of all final compounds.

| Compd | HPLC                    |            |         | Compd | HPLC                    |            |         |
|-------|-------------------------|------------|---------|-------|-------------------------|------------|---------|
|       | t <sub>R</sub><br>(min) | Purity (%) |         |       | t <sub>R</sub><br>(min) | Purity (%) |         |
|       |                         | 254(nm)    | 280(nm) |       |                         | 254(nm)    | 280(nm) |
| 13    | 13.348                  | 96.91      | 96.67   | 34    | 14.132                  | 96.77      | 95.40   |
| 14    | 12.186                  | 97.67      | 95.75   | 35    | 13.815                  | 96.58      | 95.75   |
| 15    | 12.770                  | 98.63      | 97.99   | 36    | 14.042                  | 97.28      | 95.081  |
| 16    | 13.245                  | 99.72      | 97.20   | 37    | 13.955                  | 95.75      | 95.11   |
| 17    | 13.491                  | 95.95      | 95.00   | 38    | 13.755                  | 97.10      | 96.13   |
| 18    | 13.569                  | 96.03      | 95.18   | 39    | 13.090                  | 99.29      | 96.92   |
| 19    | 14.350                  | 97.72      | 96.62   | 45    | 14.322                  | 99.31      | 98.40   |
| 20    | 13.476                  | 96.91      | 97.12   | 48    | 12.877                  | 97.20      | 95.81   |
| 22    | 14.535                  | 96.57      | 95.73   | 49    | 14.355                  | 97.01      | 95.87   |
| 23    | 13.946                  | 96.28      | 95.36   | 50    | 13.253                  | 95.38      | 95.01   |
| 24    | 12.590                  | 99.30      | 97.46   | 51    | 12.306                  | 97.35      | 96.93   |
| 25    | 13.035                  | 98.26      | 95.60   | 52    | 13.004                  | 95.01      | 95.01   |
| 28    | 14.049                  | 98.29      | 96.17   | 53    | 13.829                  | 97.11      | 96.82   |
| 29    | 12.981                  | 98.71      | 95.06   | 54    | 14.206                  | 95.66      | 95.86   |
| 30    | 13.090                  | 99.29      | 96.92   | 55    | 14.447                  | 98.82      | 95.27   |
| 31    | 14.411                  | 97.64      | 96.59   | 56    | 14.721                  | 99.23      | 97.33   |
| 32    | 14.057                  | 97.91      | 96.55   | 57    | 15.108                  | 99.64      | 99.64   |
| 33    | 13.989                  | 99.26      | 98.21   | 58    | 13.557                  | 99.50      | 98.44   |

**HPLC purity determination for the target compounds**

**Method.** Flow rate = 1.0 mL/min; gradient elution over 18 minutes, from 10% ACN-H<sub>2</sub>O to 95% ACN-H<sub>2</sub>O with 0.5%

HCOOH, 280 nm, 254 nm; InertSustain-C18 column (5 µm 4.6×250 mm).

HPLC Traces for **45** (UV=254 nm)

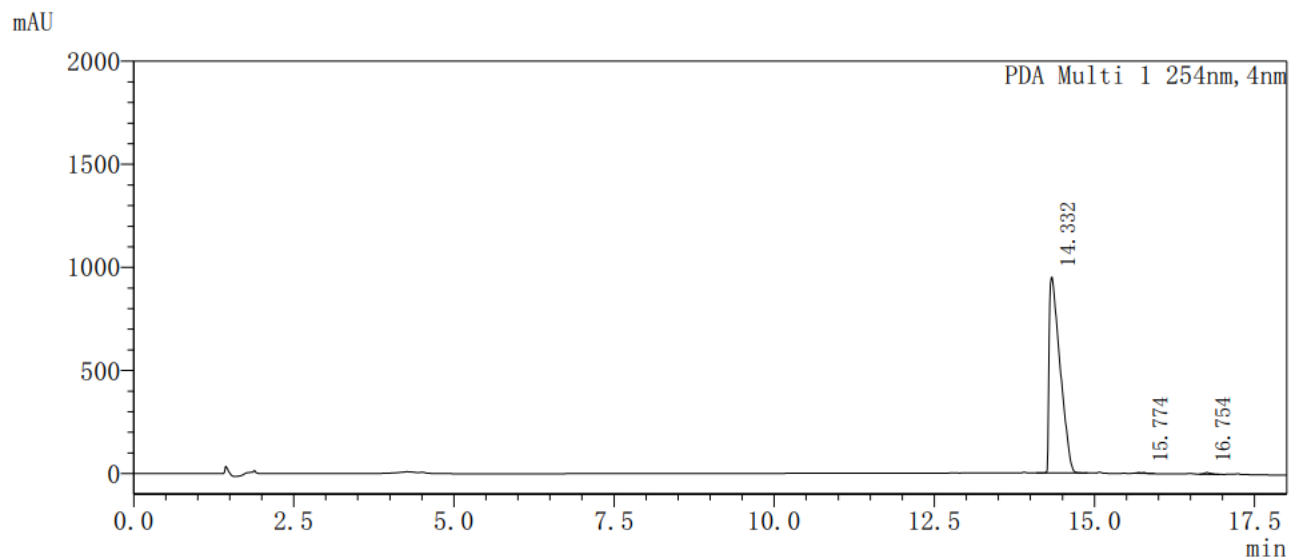

Peak Table

| Peak | Ret. time (min) | Area     | Area (%) |
|------|-----------------|----------|----------|
| 1    | 14.332          | 11279122 | 99.310   |
| 2    | 15.774          | 26585    | 0.234    |
| 3    | 16.754          | 51781    | 0.456    |

HPLC Traces for **45** (UV=280 nm),

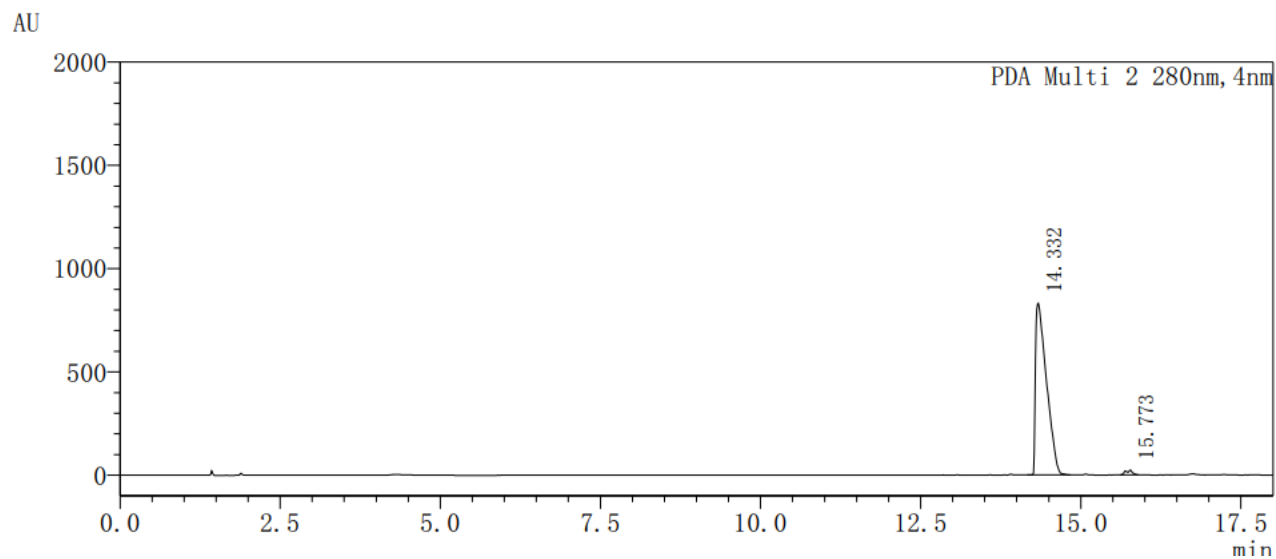

Peak Table

| Peak | Ret. time (min) | Area    | Area (%) |
|------|-----------------|---------|----------|
| 1    | 14.332          | 9946552 | 98.397   |
| 2    | 15.774          | 162088  | 1.603    |

**Method.** Flow rate = 1.0 mL/min; gradient elution over 18 minutes, from 10% ACN-H<sub>2</sub>O to 95% ACN-H<sub>2</sub>O with 0.5% HCOOH, 280 nm, 254 nm;

InertSustain-C18 column (5  $\mu$ m 4.6×250 mm).

HPLC Traces for **58** (UV=254 nm)

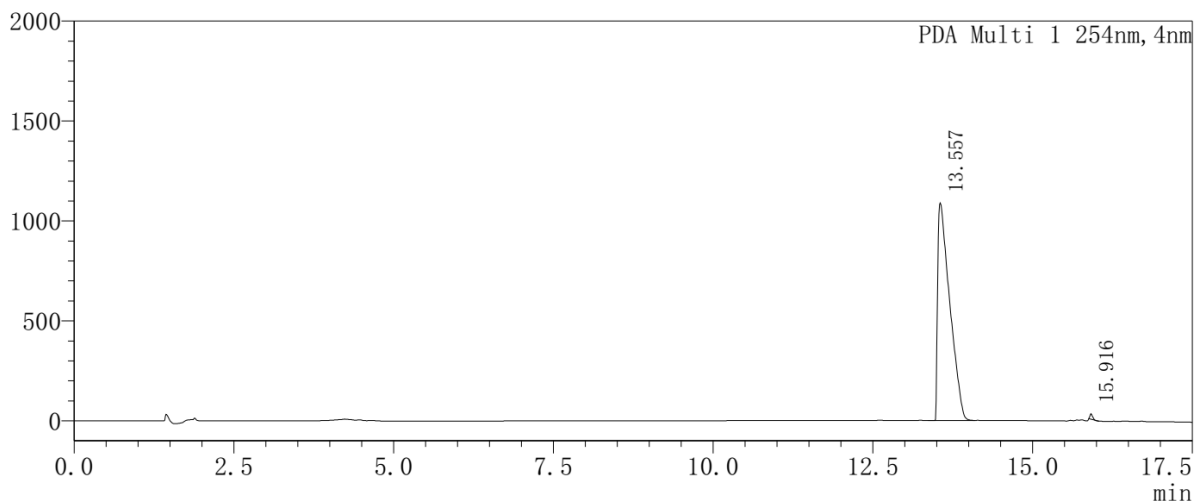

Peak Table

| Peak | Ret. time (min) | Area     | Area (%) |
|------|-----------------|----------|----------|
| 1    | 13.557          | 14408687 | 99.502   |
| 2    | 15.916          | 72043    | 0.498    |

HPLC Traces for **58** (UV=280 nm),

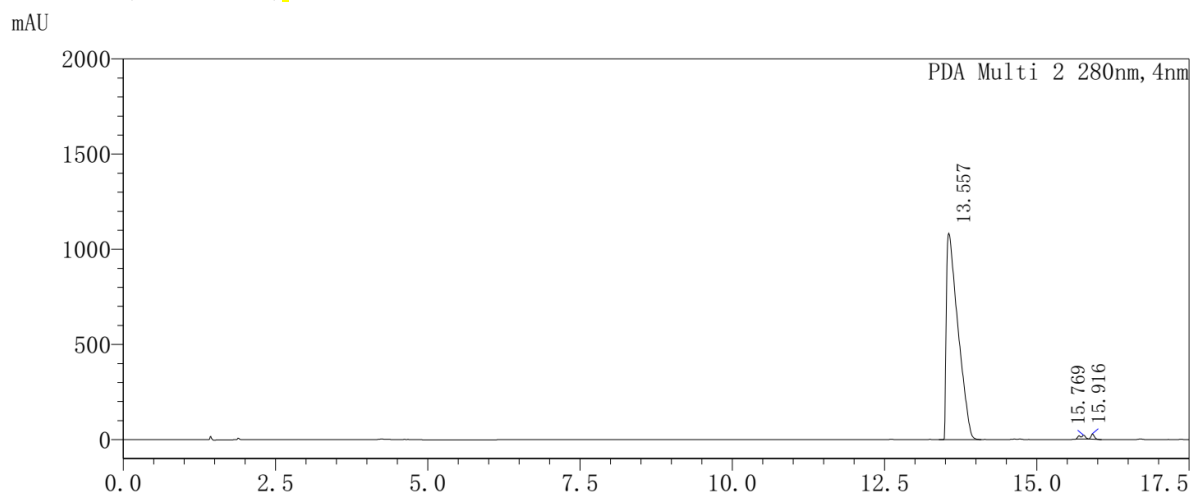

Peak Table

| Peak | Ret. time (min) | Area     | Area (%) |
|------|-----------------|----------|----------|
| 1    | 13.557          | 14464985 | 98.438   |
| 2    | 15.769          | 131683   | 0.896    |
| 3    | 15.916          | 97870    | 0.666    |

**Method.** Flow rate = 1.0 mL/min; gradient elution over 18 minutes, from 10% ACN-H<sub>2</sub>O to 95% ACN-H<sub>2</sub>O with 0.5% HCOOH, 280 nm, 254 nm;

InertSustain-C18 column (5  $\mu$ m 4.6×250 mm).

HRMS for **45**.



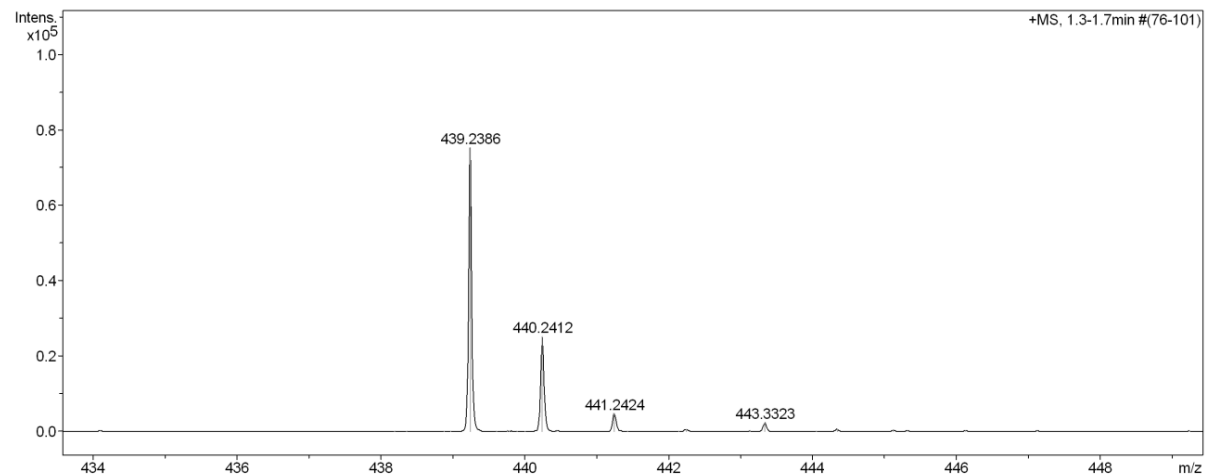

| Meas. m/z | # | Formula                                                       | m/z      | err [ppm] | Mean err [ppm] | rdB  | N-Rule | e <sup>-</sup> Conf | mSigma | Std I  | Std Mean m/z | Std I VarNorm | Std m/z Diff | Std Comb Dev |
|-----------|---|---------------------------------------------------------------|----------|-----------|----------------|------|--------|---------------------|--------|--------|--------------|---------------|--------------|--------------|
| 439.2386  | 1 | C <sub>29</sub> H <sub>31</sub> N <sub>2</sub> O <sub>2</sub> | 439.2380 | -1.3      | -0.5           | 15.5 | ok     | even                | 6.53   | 0.0121 | 0.0008       | 0.0042        | 0.0017       | 0.4160       |

HRMS for 58.

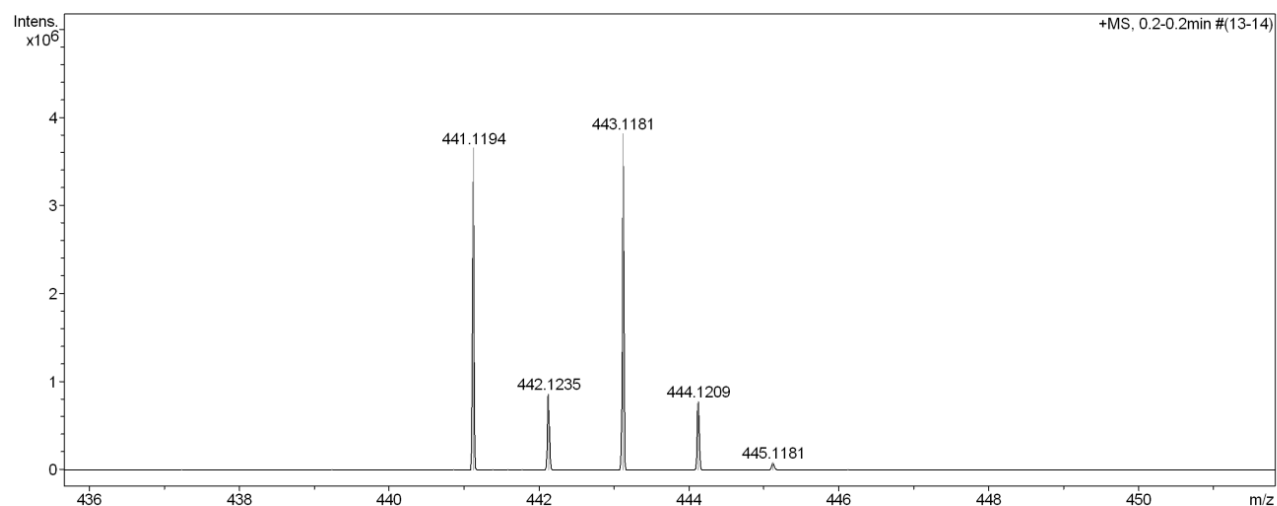

| Meas. m/z | # | Formula                                                         | m/z      | err [ppm] | Mean err [ppm] | rdB  | N-Rule | e <sup>-</sup> Conf | mSigma | Std I  | Std Mean m/z | Std I VarNorm | Std m/z Diff | Std Comb Dev |
|-----------|---|-----------------------------------------------------------------|----------|-----------|----------------|------|--------|---------------------|--------|--------|--------------|---------------|--------------|--------------|
| 441.1194  | 1 | C <sub>23</sub> H <sub>26</sub> BrN <sub>2</sub> O <sub>2</sub> | 441.1172 | -5.0      | -5.6           | 11.5 | ok     | even                | 28.99  | 0.0262 | 0.0026       | 0.0095        | 0.0005       | 0.7810       |
